# Supplementary material
Source: MDPI journal article supplement (https://www.mdpi.com/2073-4344/12/10/1087)
Supplement: s1 [file s1 › catalysts-1916729-supplementary.pdf]

## SUPPORTING INFORMATION

# Self-supported polymeric ruthenium complexes as olefin metathesis catalysts in synthesis of heterocyclic compounds

Adam A. Rajkiewicz, Anna Kajetanowicz,\* and Karol Grela\*

Biological and Chemical Research Centre, Faculty of Chemistry, University of Warsaw, Żwirki i Wigury 101, 02-089 Warsaw, Poland

\*E-mail: kl.grela@uw.edu.pl, a.kajetanowicz@uw.edu.pl

### Table of Contents

|                                                                                                                                                                                        |    |
|----------------------------------------------------------------------------------------------------------------------------------------------------------------------------------------|----|
| 1. General Information .....                                                                                                                                                           | 3  |
| 2. Preparation of NHC precursors and complexes .....                                                                                                                                   | 4  |
| 2.1. 6-[2-(Prop-1-en-1-yl)phenoxy]hexan-1-ol ( <b>2a</b> ) .....                                                                                                                       | 4  |
| 2.2. 8-[2-(Prop-1-en-1-yl)phenoxy]octan-1-ol ( <b>2b</b> ) .....                                                                                                                       | 4  |
| 2.3. 6-[2-(Prop-1-en-1-yl)phenoxy]hexyl 4-methylbenzenesulfonate ( <b>3a</b> ) .....                                                                                                   | 6  |
| 2.4. 8-[2-(Prop-1-en-1-yl)phenoxy]octyl 4-methylbenzenesulfonate ( <b>3b</b> ) .....                                                                                                   | 7  |
| 2.5. 2-({6-[2-(Prop-1-en-1-yl)phenoxy]hexyl}oxy)benzaldehyde ( <b>4a</b> ) .....                                                                                                       | 8  |
| 2.7. 2,4,6-Trimethyl-N-{2-[(2-[(6-{2-(prop-1-en-1-yl)phenoxy}hexyl)oxy]phenyl)methyl]-amino}ethyl}aniline ( <b>5a</b> ) .....                                                          | 10 |
| 2.8. 2,4,6-Trimethyl-N-{2-[(2-[(8-{2-(prop-1-en-1-yl)phenoxy}octyl)oxy]phenyl)methyl]-amino}ethyl}aniline ( <b>5b</b> ) .....                                                          | 11 |
| 2.9. 3-({2-[(6-{2-[Prop-1-en-1-yl]phenoxy}hexyl)oxy]phenyl)methyl}-1-(2,4,6-trimethylphenyl)-4,5-dihydro-1λ5-imidazol-1-ylum tetrafluoroborate ( <b>6a</b> ) .....                     | 12 |
| 2.10. 3-({2-[(8-{2-[Prop-1-en-1-yl]phenoxy}octyl)oxy]phenyl)methyl}-1-(2,4,6-trimethylphenyl)-4,5-dihydro-1λ5-imidazol-1-ylum tetrafluoroborate ( <b>6b</b> ) .....                    | 13 |
| 2.11. Benzylidene(dichloro)(1-({2-({6-[2-(prop-1-en-1-yl)phenoxy]hexyl}oxy)phenyl)methyl}-3-[2,4,6-trimethylphenyl]imidazolidin-2-ylidene)ruthenium ( <b>Ru-2<sup>C6</sup></b> ) ..... | 14 |

|       |                                                                                                                                                                                  |    |
|-------|----------------------------------------------------------------------------------------------------------------------------------------------------------------------------------|----|
| 2.12. | Benzylidene(dichloro)(1-{{2-({8-[2-(prop-1-en-1-yl)phenoxy]octyl}oxy)phenyl}methyl}-3-[2,4,6-trimethylphenyl]imidazolidin-2-ylidene)ruthenium ( <b>Ru-2<sup>C8</sup></b> ) ..... | 15 |
| 2.13. | Polymeric complex <b>Ru-3<sup>C6</sup></b> .....                                                                                                                                 | 17 |
| 2.14. | Polymeric complex <b>Ru-3<sup>C8</sup></b> .....                                                                                                                                 | 17 |
| 3.    | Catalytic activity studies.....                                                                                                                                                  | 19 |
| 3.1.  | Reaction course plots .....                                                                                                                                                      | 19 |
| 3.2.  | Recycling of polymeric ruthenium complexes .....                                                                                                                                 | 20 |
| 4.    | RCM experiments and products analysis .....                                                                                                                                      | 21 |
| 4.1.  | General procedure of RCM reactions .....                                                                                                                                         | 21 |
| 4.2.  | 1-Tosyl-2,5-dihydro-1 <i>H</i> -pyrrole ( <b>8b</b> ).....                                                                                                                       | 21 |
| 4.3.  | (2,5-Dihydro-1 <i>H</i> -pyrrol-1-yl)(3-fluorophenyl)methanone ( <b>8c</b> ).....                                                                                                | 21 |
| 4.4.  | (2,5-Dihydro-1 <i>H</i> -pyrrol-1-yl)(4-bromophenyl)methanone ( <b>8d</b> ) .....                                                                                                | 22 |
| 4.5.  | (2,5-Dihydro-1 <i>H</i> -pyrrol-1-yl)[4-(dimethylamino)phenyl]methanone ( <b>8e</b> ).....                                                                                       | 22 |
| 4.6.  | Benzyl 2-methyl-2,3,4,7-tetrahydro-1 <i>H</i> -azepine-1-carboxylate ( <b>8f</b> ).....                                                                                          | 23 |
| 4.7.  | 5-(5-((2,5-Dihydro-1 <i>H</i> -pyrrol-1-yl)sulfonyl)-2-ethoxyphenyl)-1-methyl-3-propyl-1,6-dihydro-7 <i>H</i> -pyrazolo[4,3- <i>d</i> ]pyrimidin-7-one ( <b>8g</b> ) .....       | 24 |
| 5.    | NMR spectra of compounds .....                                                                                                                                                   | 25 |
| 6.    | References.....                                                                                                                                                                  | 49 |

## 1. General Information

All reactions requiring the exclusion of oxygen and moisture were performed in dry glassware with dry solvents (SPS MBraun), under a dry and oxygen-free argon atmosphere using standard Schlenk technique. The addition of dry solvents or reagents was carried out using argon flushed stainless steel cannulas and plastic syringes. Analytical thin layer chromatography (TLC) was performed on Merck Silica gel 60 F254 precoated aluminum sheets. Components were visualized by observation under UV light (254 or 365 nm) or dyed by aqueous  $\text{KMnO}_4$  reagent. Flash column chromatography was carried out using silica gel 60 (230 – 400 mesh), purchased from Merck.  $^1\text{H}$ ,  $^{13}\text{C}$ ,  $^{19}\text{F}$ , and  $^{31}\text{P}$  NMR spectroscopic data were collected on Varian 400 MHz spectrometer at ambient temperature. The chemical shifts are reported in ppm relative to solvent peaks. GC chromatograms were recorded using PerkinElmer Clarus 580 with IntertCap 5MS-Sil column. GC conversions were determined based on the ratio of an internal standard (1,2,4,5-tetramethylbenzene) and the starting material. High resolution mass spectra were recorded on Thermo QExactive and AutoSpec Premier mass spectrometer. MALDI-TOF analysis were recorded on Waters SYNAPT G2-Si (qToF type) spectrometer. IR spectra were recorded on JASCO FT/IR-6200 spectrometer with ATR attachment. Elemental analyses were carried out at the Polish Academy of Sciences, Institute of Organic Chemistry.

**Ru-4** was synthesized in accordance to literature.<sup>1</sup> RCM substrates was synthesized according to literature: **7a**<sup>2</sup>, **7b**<sup>3</sup>, **7c**<sup>4</sup>, **7d**<sup>5</sup>, **7e**<sup>6</sup>, **7f**<sup>7</sup>, **7g**<sup>8</sup>. Unless otherwise noted, all materials were purchased from commercial suppliers and used as received.

## 2. Preparation of NHC precursors and complexes

### 2.1. 6-[2-(Prop-1-en-1-yl)phenoxy]hexan-1-ol (2a)

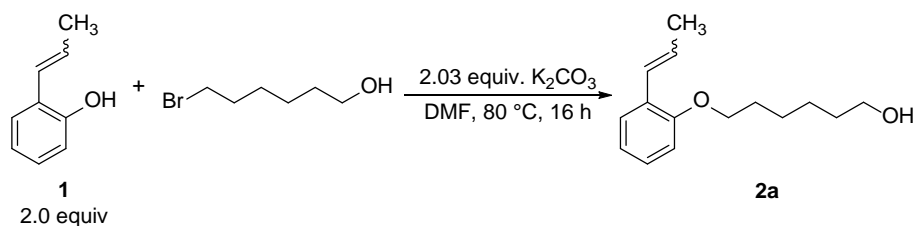

250 mL round-bottomed flask was evacuated and refilled with argon (3 times), then under the argon atmosphere, 2-(prop-1-en-1-yl)phenol (**1**) (6.56 mL, 50.0 mmol) and 6-bromo-1-hexanol (3.37 mL, 25.0 mmol) were dissolved in anhydrous DMF (70 mL), followed by addition of  $K_2CO_3$  (7.09 g, 50.7 mmol). The resulting mixture was stirred at 80 °C for 16 h, under argon atmosphere. After cooling to room temperature AcOEt (140 mL) was added and the resulting mixture was washed with water (3 x 100 mL) and brine (100 mL), then organic phase was dried over anhydrous  $Na_2SO_4$ , filtered, and volatiles were evaporated *in vacuo*. The resulting crude product was purified by column chromatography (*n*-hex/AcOEt 9:1 to 3:1), providing product as a yellowish, dense liquid (4.35 g, 74% yield, *E/Z* = 56:44).

Major isomer (*E*):

$R_f$  = 0.13 (*n*-hex/AcOEt 4:1)

$^1H$  NMR (400 MHz,  $CDCl_3$ )  $\delta$  7.40 (dd,  $J$  = 7.6, 1.7 Hz, 1H), 7.15 (ddd,  $J$  = 8.2, 7.5, 1.7 Hz, 1H), 6.92 (tdd,  $J$  = 7.1, 1.5, 0.8 Hz, 1H), 6.83 (dd,  $J$  = 8.2, 1.0 Hz, 1H), 6.72 (dq,  $J$  = 15.9, 1.7 Hz, 1H), 6.24 (dq,  $J$  = 15.9, 6.6 Hz, 1H), 3.98 (t,  $J$  = 6.5 Hz, 2H), 3.67 (dd,  $J$  = 10.8, 5.4 Hz, 2H), 1.90 (dd,  $J$  = 6.6, 1.8 Hz, 3H), 1.83 – 1.78 (m, 1H), 1.61 (td,  $J$  = 13.0, 6.4 Hz, 2H), 1.56 – 1.40 (m, 6H).

$^{13}C$  NMR (101 MHz,  $CDCl_3$ )  $\delta$  155.7, 130.2, 127.8, 127.2, 126.5, 125.8, 120.6, 112.0, 68.3, 63.0, 32.8, 29.4, 26.1, 25.7, 19.1.

HRMS (ESI):  $m/z$  257.1514 ( $[M+Na]^+$ ,  $C_{15}H_{22}O_2Na^+$  calcd. 257.1517).

EA: Anal. calcd. for  $C_{15}H_{22}O_2$ : C, 76.88; H, 9.46. Found: C, 76.63; H, 9.60.

FT-IR-ATR: 3334, 3030, 2933, 2859, 1596, 1448, 1239, 1110, 1048, 746  $cm^{-1}$ .

## 2.2. 8-[2-(Prop-1-en-1-yl)phenoxy]octan-1-ol (2b)

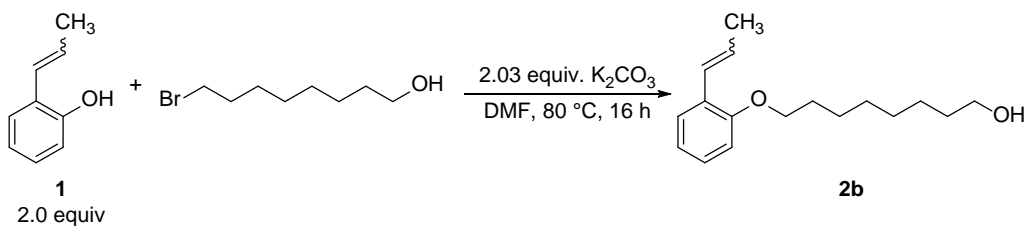

250 mL round-bottomed flask was evacuated and refilled with argon (3 times), then under the argon atmosphere, 2-(prop-1-en-1-yl)phenol (**1**) (9.58 mL, 73.0 mmol) and 8-bromo-1-octanol (6.52 mL, 36.5 mmol) were dissolved in anhydrous DMF (100 mL), followed by addition of  $\text{K}_2\text{CO}_3$  (10.4 g, 74.1 mmol). The resulting mixture was stirred at 80 °C for 16 h, under argon atmosphere. After cooling to the room temperature AcOEt (250 mL) was added, and the resulting mixture was washed with water (3 x 250 mL) and brine (100 mL), then organic phase was dried over anhydrous  $\text{Na}_2\text{SO}_4$ , filtered, and volatiles were evaporated *in vacuo*. The resulting crude product was purified by column chromatography (*n*-hex/AcOEt 9:1 to 3:1), and then distilled under reduced pressure using Kugelrohr apparatus ( $p = 0.08$  mbar,  $T = 200$  °C) providing product as a colorless, dense liquid (3.20 g, 33% yield, *E/Z* = 4:1). The product contained small amounts of impurities which were unable to remove thus elemental analysis was not performed, however the purity was fair enough to perform next step.

Major isomer (*E*):

$R_f = 0.17$  (*n*-hex/AcOEt 4:1)

**$^1\text{H}$  NMR** (400 MHz,  $\text{CDCl}_3$ )  $\delta$  7.39 (dd,  $J = 7.6, 1.7$  Hz, 1H), 7.15 (ddd,  $J = 8.2, 7.5, 1.7$  Hz, 1H), 6.91 – 6.86 (m, 1H), 6.83 (dd,  $J = 8.2, 1.0$  Hz, 1H), 6.72 (dq,  $J = 15.9, 1.7$  Hz, 1H), 6.24 (dq,  $J = 15.9, 6.6$  Hz, 1H), 3.97 (t,  $J = 6.5$  Hz, 2H), 3.65 (t,  $J = 6.6$  Hz, 2H), 1.92 – 1.88 (m, 3H), 1.82 – 1.69 (m, 2H), 1.62 – 1.53 (m, 2H), 1.53 – 1.43 (m, 2H), 1.42 – 1.28 (m, 7H).

**$^{13}\text{C}$  NMR** (101 MHz,  $\text{CDCl}_3$ )  $\delta$  155.7, 127.6, 127.1, 126.3, 126.2, 125.7, 120.5, 111.9, 68.3, 63.0, 32.8, 29.34, 29.32, 29.26, 26.1, 25.7, 19.0.

**HRMS** (ESI):  $m/z$  285.1832 ( $[\text{M}+\text{Na}]^+$ ,  $\text{C}_{17}\text{H}_{26}\text{O}_2\text{Na}^+$  calcd. 285.1830).

**FT-IR-ATR**: 3345, 3033, 2927, 2854, 1597, 1385, 1236, 1114, 963, 800, 747  $\text{cm}^{-1}$ .

### 2.3. 6-[2-(Prop-1-en-1-yl)phenoxy]hexyl 4-methylbenzenesulfonate (3a)

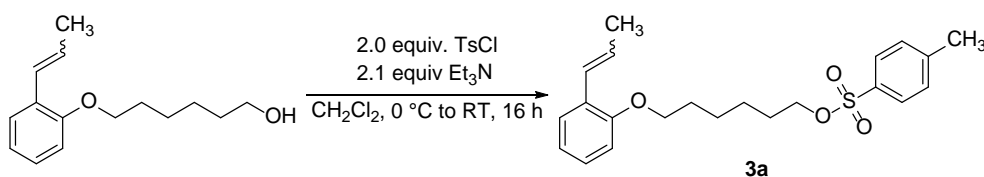

250 mL round-bottomed flask was evacuated and refilled with argon (3 times), then under the argon atmosphere 6-[2-(prop-1-en-1-yl)phenoxy]hexan-1-ol (4.00 g, 17.1 mmol) was dissolved in CH<sub>2</sub>Cl<sub>2</sub> (60 mL). Then, resulting mixture was cooled down to 0 °C and *p*-toluenesulfonyl chloride (6.65 g, 34.2 mmol) and Et<sub>3</sub>N (5.00 mL, 35.9 mmol) were added. The resulting mixture was warmed to room temperature and stirred under argon atmosphere for 16 h. After, resulting mixture was transferred to separatory funnel, diluted with CH<sub>2</sub>Cl<sub>2</sub> (60 mL), and washed successively with 1M HCl (100 mL), sat. aq. NaHCO<sub>3</sub> (100 mL), and brine (100 mL). Organic phase was collected, dried over anhydrous MgSO<sub>4</sub>, filtered, and concentrated *in vacuo*. Crude mixture was purified by column chromatography (*n*-hex/AcOEt, 9:1 to 4:1), providing product as a colorless sticky solid (4.85 g, 73% yield, E/Z = 58:42).

Major isomer (*E*):

**R<sub>f</sub>** = 0.31 (*n*-hex/AcOEt 4:1)

**<sup>1</sup>H NMR** (400 MHz, CDCl<sub>3</sub>) δ 7.79 (d, *J* = 8.2 Hz, 2H), 7.39 (dd, *J* = 7.6, 1.7 Hz, 1H), 7.34 (ddd, *J* = 2.5, 1.2, 0.6 Hz, 2H), 7.15 (ddd, *J* = 8.2, 7.5, 1.7 Hz, 1H), 6.93 – 6.85 (m, 1H), 6.81 (dd, *J* = 8.2, 1.0 Hz, 1H), 6.69 (dq, *J* = 15.9, 1.6 Hz, 1H), 6.22 (dq, *J* = 15.9, 6.6 Hz, 1H), 4.04 (t, *J* = 6.4 Hz, 2H), 3.93 (t, *J* = 6.4 Hz, 2H), 2.44 (s, 3H), 1.89 (dd, *J* = 6.6, 1.8 Hz, 3H), 1.81 – 1.63 (m, 4H), 1.50 – 1.34 (m, 4H).

**<sup>13</sup>C NMR** (101 MHz, CDCl<sub>3</sub>) δ 155.7, 144.8, 130.2, 130.0, 128.0, 127.8, 127.2, 126.6, 126.5, 125.7, 120.7, 111.9, 70.6, 68.1, 29.2, 28.9, 25.7, 25.3, 21.8, 19.1.

**HRMS** (ESI): *m/z* 411.1593 ([M+Na]<sup>+</sup>, C<sub>22</sub>H<sub>28</sub>O<sub>4</sub>SN<sup>+</sup> calcd. 411.1606).

**EA:** Anal. calcd. for C<sub>22</sub>H<sub>28</sub>O<sub>4</sub>S: C, 68.01; H, 7.26; S, 8.25. Found: C, 67.84; H, 7.27; S, 8.38.

**FT-IR-ATR:** 3058, 3035, 2943, 2863, 1597, 1476, 1355, 1241, 1170, 951, 750 cm<sup>-1</sup>.

## 2.4. 8-[2-(Prop-1-en-1-yl)phenoxy]octyl 4-methylbenzenesulfonate (3b)

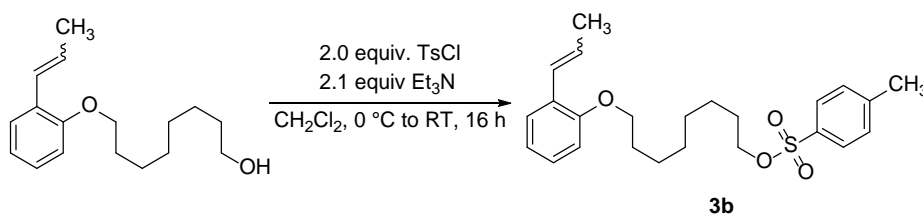

100 mL round-bottomed flask was evacuated and refilled with argon (3 times), then under the argon atmosphere 8-[2-(prop-1-en-1-yl)phenoxy]octan-1-ol (3.26 g, 12.4 mmol) was dissolved in CH<sub>2</sub>Cl<sub>2</sub> (42 mL). Then, resulting mixture was cooled down to 0 °C and *p*-toluenesulfonyl chloride (4.84 g, 24.9 mmol) and Et<sub>3</sub>N (3.63 mL, 26.1 mmol) were added. The resulting mixture was warmed to room temperature and stirred under argon atmosphere for 16 h. After, resulting mixture was transferred to separatory funnel, diluted with CH<sub>2</sub>Cl<sub>2</sub> (40 mL), and washed successively with 1M HCl (100 mL), sat. aq. NaHCO<sub>3</sub> (100 mL), and brine (100 mL). Organic phase was collected, dried over anhydrous MgSO<sub>4</sub>, filtered, and concentrated. Crude mixture was purified by column chromatography (*n*-hex/AcOEt, 9:1 to 8:2), providing product as a colorless sticky solid (4.03 g, **78%** yield, E/Z = 84:16).

Major isomer (*E*):

**R<sub>f</sub>** = 0.45 (*n*-hex/AcOEt 8:2)

**<sup>1</sup>H NMR** (400 MHz, CDCl<sub>3</sub>) δ 7.84 – 7.78 (m, 2H), 7.41 (dd, *J* = 7.6, 1.6 Hz, 1H), 7.37 – 7.33 (m, 2H), 7.19 – 7.13 (m, 1H), 6.90 (t, *J* = 7.1 Hz, 1H), 6.84 (dd, *J* = 8.2, 0.9 Hz, 1H), 6.73 (dd, *J* = 15.9, 1.7 Hz, 1H), 6.25 (dq, *J* = 15.9, 6.6 Hz, 1H), 4.04 (t, *J* = 6.5 Hz, 2H), 3.97 (t, *J* = 6.5 Hz, 2H), 2.46 (s, 3H), 1.91 (dd, *J* = 6.6, 1.7 Hz, 3H), 1.84 – 1.75 (m, 2H), 1.71 – 1.61 (m, 2H), 1.46 (dt, *J* = 14.9, 6.8 Hz, 2H), 1.39 – 1.25 (m, 6H).

**<sup>13</sup>C NMR** (101 MHz, CDCl<sub>3</sub>) δ 155.8, 144.8, 133.4, 130.0, 128.0, 127.8, 127.2, 126.5, 126.3, 125.8, 120.7, 112.0, 70.8, 68.4, 29.4, 29.3, 29.0, 28.9, 26.1, 25.4, 21.8, 19.1.

**HRMS** (ESI): *m/z* 417.2094 ([M+H]<sup>+</sup>, C<sub>24</sub>H<sub>33</sub>O<sub>4</sub>S<sup>+</sup> calcd. 417.2094).

**EA**: Anal. calcd. for C<sub>24</sub>H<sub>32</sub>O<sub>4</sub>S: C, 69.20; H, 7.74; S, 7.70. Found: C, 69.06; H, 7.68; S, 7.57.

**FT-IR-ATR**: 3032, 2931, 2856, 1597, 1450, 1357, 1239, 1175, 948, 750 cm<sup>-1</sup>.

## 2.5. 2-({6-[2-(Prop-1-en-1-yl)phenoxy]hexyl}oxy)benzaldehyde (4a)

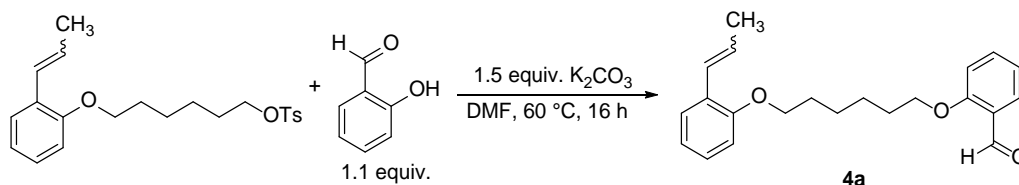

250 mL round-bottomed flask was evacuated and refilled with argon (3 times), then under the argon atmosphere, 6-[2-(prop-1-en-1-yl)phenoxy]hexyl 4-methylbenzenesulfonate (4.30 g, 11.1 mmol) and salicylaldehyde (1.28 mL, 12.2 mmol) were dissolved in anhydrous DMF (40 mL), followed by addition of  $K_2CO_3$  (2.32 g, 16.6 mmol). The resulting mixture was stirred at 60 °C for 16 h, under argon atmosphere. After cooling to RT,  $Et_2O$  (80 mL) was added, and the resulting mixture was washed with water (3 x 50 mL), then organic phase was dried over anhydrous  $MgSO_4$ , filtered, and volatiles were evaporated *in vacuo*. The crude product was purified by column chromatography (*n*-hex/AcOEt 9:1 to 8:2) and was isolated as a colorless liquid (3.93 g, 91% yield, *E/Z* = 58:42).

Major isomer (*E*):

$R_f$  = 0.30 (*n*-hex/AcOEt 8:2).

**$^1H$  NMR** (400 MHz,  $CDCl_3$ )  $\delta$  10.52 (s, 1H), 7.84 (dd,  $J$  = 7.7, 1.8 Hz, 1H), 7.53 (ddd,  $J$  = 8.4, 7.3, 1.9 Hz, 1H), 7.40 (dd,  $J$  = 7.6, 1.7 Hz, 1H), 7.16 (ddd,  $J$  = 8.2, 7.5, 1.7 Hz, 1H), 7.04 – 6.99 (m, 1H), 6.99 – 6.96 (m, 1H), 6.92 (td,  $J$  = 7.5, 0.8 Hz, 1H), 6.84 (dd,  $J$  = 8.2, 1.0 Hz, 1H), 6.72 (dq,  $J$  = 15.9, 1.6 Hz, 1H), 6.23 (dq,  $J$  = 15.9, 6.6 Hz, 1H), 4.10 (t,  $J$  = 6.4 Hz, 2H), 4.00 (t,  $J$  = 6.4 Hz, 2H), 1.89 (dd,  $J$  = 6.6, 1.7 Hz, 3H), 1.94 – 1.82 (m, 4H), 1.63 – 1.54 (m, 4H).

**$^{13}C$  NMR** (101 MHz,  $CDCl_3$ )  $\delta$  189.9, 161.6, 155.7, 136.0, 128.3, 127.8, 127.1, 126.4, 126.2, 125.7, 124.9, 120.6, 120.6, 112.5, 111.9, 68.4, 68.1, 29.3, 29.1, 26.0, 25.9, 19.1.

**HRMS** (ESI):  $m/z$  361.1778 ( $[M+Na]^+$ ,  $C_{22}H_{26}O_3Na^+$  calcd. 361.1780).

**EA**: Anal. calcd. for  $C_{22}H_{26}O_3$ : C, 78.07; H, 7.74. Found: C, 77.94; H, 7.99.

**FT-IR-ATR**: 3075, 3045, 2942, 2856, 1682, 1596, 1452, 1235, 977, 748  $cm^{-1}$ .

## 2.6. 2-({8-[2-(Prop-1-en-1-yl)phenoxy]octyl}oxy)benzaldehyde (4b)

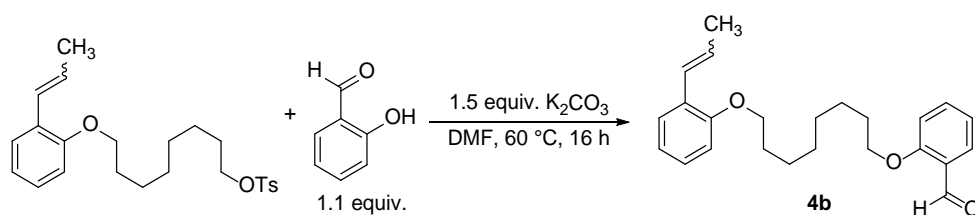

100 mL round-bottomed flask was evacuated and refilled with argon (3 times), then under the argon atmosphere, 8-[2-(prop-1-en-1-yl)phenoxy]octyl 4-methylbenzenesulfonate (4.00 g, 9.60 mmol) and salicylaldehyde (1.11 mL, 10.6 mmol) were dissolved in anhydrous DMF (35 mL), followed by addition of  $K_2CO_3$  (2.01 g, 14.4 mmol). The resulting mixture was stirred at 60 °C for 16 h, under argon atmosphere. After cooling to RT,  $Et_2O$  (70 mL) was added, and the resulting mixture was washed with water (3 x 35 mL), then organic phase was dried over anhydrous  $MgSO_4$ , filtered, and volatiles were evaporated *in vacuo*. The crude product was purified by column chromatography (*n*-hex/AcOEt 9:1 to 8:2) and isolated as a colorless solid (3.25 g, 92% yield, *E/Z* = 85:15).

Major isomer (*E*):

$R_f$  = 0.32 (*n*-hex/AcOEt 8:2)

**$^1H$  NMR** (400 MHz,  $CDCl_3$ )  $\delta$  10.52 (d,  $J$  = 0.8 Hz, 1H), 7.83 (dd,  $J$  = 7.7, 1.8 Hz, 1H), 7.53 (ddd,  $J$  = 8.4, 7.3, 1.9 Hz, 1H), 7.39 (dd,  $J$  = 7.6, 1.7 Hz, 1H), 7.15 (ddd,  $J$  = 8.1, 7.5, 1.7 Hz, 1H), 7.04 – 6.98 (m, 1H), 6.97 (d,  $J$  = 8.5 Hz, 1H), 6.88 (td,  $J$  = 7.4, 0.7 Hz, 1H), 6.84 (dd,  $J$  = 8.2, 1.0 Hz, 1H), 6.72 (dq,  $J$  = 15.9, 1.6 Hz, 1H), 6.24 (dq,  $J$  = 15.9, 6.6 Hz, 1H), 4.08 (t,  $J$  = 6.4 Hz, 2H), 3.98 (t,  $J$  = 6.5 Hz, 2H), 1.89 (dd,  $J$  = 6.6, 1.8 Hz, 3H), 1.88 – 1.78 (m, 4H), 1.56 – 1.46 (m, 4H), 1.46 – 1.38 (m, 4H).

**$^{13}C$  NMR** (101 MHz,  $CDCl_3$ )  $\delta$  190.1, 161.7, 155.8, 136.1, 128.4, 127.8, 127.2, 126.5, 126.3, 125.9, 125.0, 120.63, 120.62, 112.6, 112.0, 68.6, 68.4, 29.43, 29.41, 29.39, 29.2, 26.24, 26.16, 19.2.

**HRMS** (ESI):  $m/z$  367.2281 ( $[M + H]^+$ ,  $C_{24}H_{31}O_3^+$  calcd. 367.2273).

**EA**: Anal. calcd. for  $C_{24}H_{30}O_3$ : C, 78.65; H, 8.25. Found: C, 78.62; H, 8.25.

**FT-IR-ATR**: 3043, 2926, 2854, 1638, 1596, 1450, 1234, 1040, 961, 747  $cm^{-1}$ .

**2.7. 2,4,6-Trimethyl-*N*-{2-[(6-{2-(prop-1-en-1-yl)phenoxy}hexyl)oxy]phenyl}methyl)-amino]ethyl}aniline (5a)**

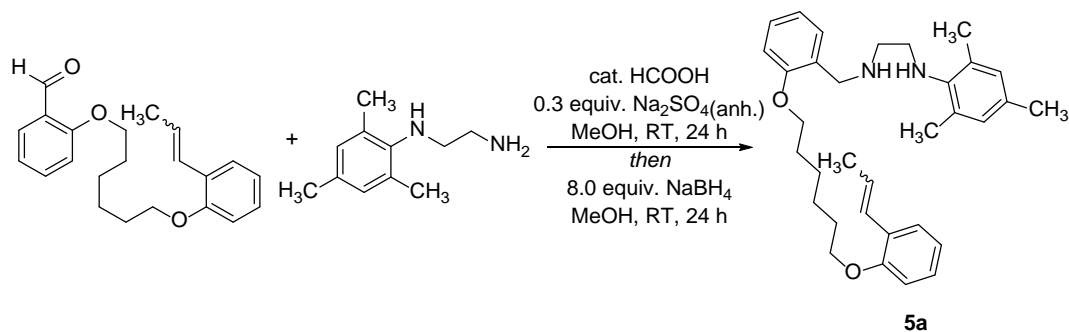

The 100 mL round-bottomed flask was evacuated and refilled with argon (3 times), then 2-((6-{2-(prop-1-en-1-yl)phenoxy}hexyl)oxy)benzaldehyde (5.65 g, 16.7 mmol) was dissolved in anhydrous MeOH (35 mL). After, under argon atmosphere, *N*-mesitylethylenediamine (2.98 g, 16.7 mmol) was added and reaction mixture was stirred at room temperature for 5 minutes, when after Na<sub>2</sub>SO<sub>4</sub> (712 mg, 5.01 mmol) and a drop of HCOOH were added. The resulting mixture immediately turned yellow and it was stirred under argon atmosphere at room temperature for 24 h. Next, NaBH<sub>4</sub> (5.16 g, 134 mmol) was added in small portions over the period of 30 minutes. After completion of addition the resulting mixture was stirred under argon atmosphere for 24 h. After, 5% aq. NaOH (35 mL) was added, and the MeOH was evaporated *in vacuo*. The resulting aqueous phase was extracted with CH<sub>2</sub>Cl<sub>2</sub> (4 x 35 mL) and organic phases were combined, washed with water (50 mL), brine (50 mL), then dried over anhydrous Na<sub>2</sub>SO<sub>4</sub>, filtered, and concentrated. The residue was purified by column chromatography (CH<sub>2</sub>Cl<sub>2</sub>/MeOH 20:0 to 19:1) to provide the desired product as a colorless dense oil (6.10 g, 73% yield, *E/Z* 56:44).

Major isomer (*E*):

**R<sub>f</sub>** = 0.28 (CH<sub>2</sub>Cl<sub>2</sub>/MeOH 19:1)

**<sup>1</sup>H NMR** (400 MHz, CDCl<sub>3</sub>) δ 7.40 (dd, *J* = 7.6, 1.7 Hz, 1H), 7.24 (d, *J* = 7.6 Hz, 1H), 7.22 – 7.18 (m, 1H), 7.18 – 7.13 (m, 1H), 6.95 – 6.83 (m, 4H), 6.81 (s, *J* = 3.4 Hz, 2H), 6.72 (dd, *J* = 15.9, 1.7 Hz, 1H), 6.24 (dq, *J* = 15.9, 6.6 Hz, 1H), 4.01 (t, *J* = 6.4 Hz, 2H), 3.96 (t, *J* = 6.5 Hz, 2H), 3.85 (s, 2H), 3.06 – 3.02 (m, 2H), 2.81 – 2.77 (m, 2H), 2.26 (s, 6H), 2.22 (s, 3H), 1.89 (dd, *J* = 6.6, 1.7 Hz, 3H), 1.87 – 1.78 (m, 4H), 1.60 – 1.50 (m, 4H).

**<sup>13</sup>C NMR** (101 MHz, CDCl<sub>3</sub>) δ 157.2, 155.7, 144.0, 131.1, 129.7, 129.5, 128.5, 128.3, 127.8, 127.2, 126.58, 126.55, 126.5, 126.3, 125.8, 120.6, 120.3, 111.9, 111.1, 68.2, 67.8, 49.1, 48.4, 29.42, 29.35, 26.11, 26.07, 20.7, 19.1, 18.6.

**HRMS** (ESI): *m/z* 501.3484 ([*M* + *H*]<sup>+</sup>, C<sub>33</sub>H<sub>45</sub>N<sub>2</sub>O<sub>2</sub><sup>+</sup> calcd. 501.3481).

EA: Anal. calcd. for C<sub>33</sub>H<sub>44</sub>N<sub>2</sub>O<sub>2</sub>: C, 79.16; H, 8.86; N, 5.59. Found: C, 79.18; H, 8.82; N, 5.71.

FT-IR-ATR: 3348, 3033, 2931, 1597, 1451, 1236, 1113, 1027, 853, 748 cm<sup>-1</sup>.

**2.8. 2,4,6-Trimethyl-*N*-{2-[(8-{2-(prop-1-en-1-yl)phenoxy}octyl)oxy]phenyl}methyl)-amino]ethyl]aniline (5b)**

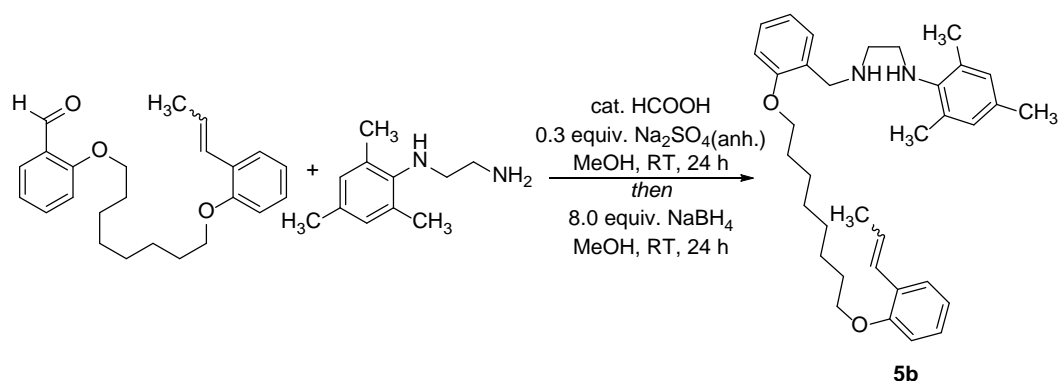

The 100 mL round-bottomed flask was evacuated and refilled with argon (3 times), then 2-[(8-{2-(prop-1-en-1-yl)phenoxy}octyl)oxy]benzaldehyde (1.10 g, 3.00 mmol) was dissolved in anhydrous MeOH (13 mL). After, under argon atmosphere, *N*-mesitylethylenediamine (535 mg, 3.00 mmol) was added and the reaction mixture was stirred at room temperature for 5 minutes, when after Na<sub>2</sub>SO<sub>4</sub> (128 mg, 0.90 mmol) and a drop of HCOOH were added. The resulting mixture immediately turned yellow and it was stirred under argon atmosphere at room temperature for 24 h. Next, NaBH<sub>4</sub> (926 mg, 24.0 mmol) was added in small portions over the period of 30 minutes. After completion of addition the resulting mixture was stirred under argon atmosphere for 24 h. After, 5% aq. NaOH (13 mL) was added, and the MeOH was evaporated *in vacuo*. The resulting aqueous phase was extracted with CH<sub>2</sub>Cl<sub>2</sub> (4 x 20 mL) and organic phases were combined, washed with water (20 mL), brine (20 mL), then dried over anhydrous Na<sub>2</sub>SO<sub>4</sub>, filtered, and concentrated. The residue was purified by column chromatography (CH<sub>2</sub>Cl<sub>2</sub>/MeOH 20:0 to 19:1) to provide the desired product as a colorless dense oil (977 mg, 62% yield, *E/Z* 85:15).

Major isomer (*E*):

R<sub>f</sub> = 0.23 (CH<sub>2</sub>Cl<sub>2</sub>/MeOH 19:1)

<sup>1</sup>H NMR (400 MHz, CDCl<sub>3</sub>) δ 7.41 (dd, *J* = 7.6, 1.7 Hz, 1H), 7.26 (d, *J* = 7.6 Hz, 1H), 7.24 (dd, *J* = 7.8, 1.9 Hz, 1H), 7.19 – 7.14 (m, 1H), 6.96 – 6.84 (m, 4H), 6.83 – 6.81 (m, 2H), 6.75 (dd, *J* = 15.9, 1.7 Hz, 1H), 6.26 (dq, *J* = 15.9, 6.6 Hz, 1H), 4.00 (t, *J* = 6.4 Hz, 2H), 3.98 (t, *J* = 6.5 Hz, 2H), 3.88 (s, 2H), 3.08 – 3.04 (m, 2H), 2.84 – 2.80 (m, 2H), 2.28 (s, 6H), 2.24 (s, 3H), 1.92 (dd, *J* = 6.6, 1.7 Hz, 3H), 1.85 – 1.78 (m, 4H), 1.55 – 1.45 (m, 4H), 1.44 – 1.36 (m, 4H).

**<sup>13</sup>C NMR** (101 MHz, CDCl<sub>3</sub>) δ 157.3, 155.8, 143.9, 131.2, 130.0, 129.8, 129.5, 128.4, 128.0, 127.8, 127.2, 126.5, 126.2, 125.8, 120.6, 120.3, 112.0, 111.2, 72.7, 70.5, 68.4, 67.9, 49.2, 49.0, 48.2, 29.45, 29.39, 26.28, 26.23, 20.7, 19.1, 18.6.

**HRMS** (ESI): *m/z* 529.3791 ([*M* + *H*]<sup>+</sup>, C<sub>35</sub>H<sub>49</sub>N<sub>2</sub>O<sub>2</sub><sup>+</sup> calcd. 529.3789).

**EA**: Anal. calcd. for C<sub>35</sub>H<sub>48</sub>N<sub>2</sub>O<sub>2</sub>: C, 79.50; H, 9.15; N, 5.30. Found: C, 79.51; H, 9.09; N, 5.32.

**FT-IR-ATR**: 3348, 3032, 2931, 2854, 1597, 1452, 1237, 1113, 1027, 853, 747 cm<sup>-1</sup>.

**2.9. 3-((2-[(6-{2-[(Prop-1-en-1-yl]phenoxy)hexyl]oxy}phenyl)methyl]-1-(2,4,6-trimethyl-phenyl)-4,5-dihydro-1λ5-imidazol-1-ylum tetrafluoroborate (6a)**

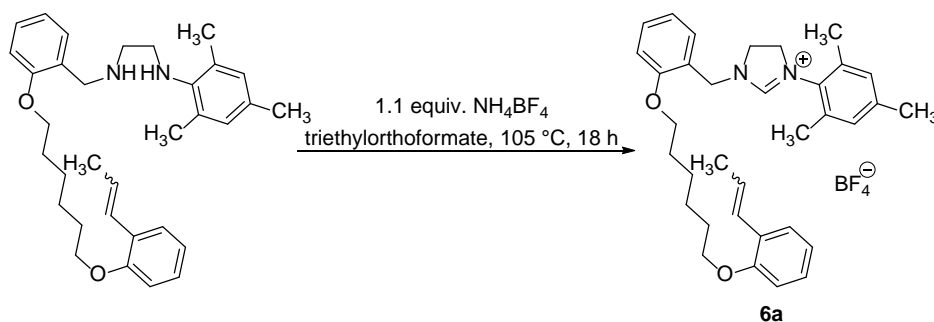

To a 20 mL vial was added 2,4,6-trimethyl-N-{2-[(2-[(6-{2-[(prop-1-en-1-yl]phenoxy)hexyl]oxy}phenyl)methyl]amino]ethyl}aniline (1001 mg, 2.00 mmol) and triethyl orthoformate (6.8 mL, 40.0 mmol), followed by NH<sub>4</sub>BF<sub>4</sub> (238 mg, 2.20 mmol). The vial was closed with a screw cap, needle was put in the septum, and the reaction mixture was heated to 105 °C for 16 h. Next, the reaction mixture was cooled to room temperature and the solvent was evaporated *in vacuo*. The residue was purified by column chromatography (DCM/MeOH 1:0 to 97:3) providing product as a yellowish foamy solid (921 mg, 77% yield, *E/Z* 4:1).

Major isomer (*E*):

**R<sub>f</sub>** = 0.18 (CH<sub>2</sub>Cl<sub>2</sub>/MeOH 19:1)

**<sup>1</sup>H NMR** (400 MHz, CDCl<sub>3</sub>) δ 7.89 (s, 1H), 7.41 (dd, *J* = 7.4, 1.3 Hz, 1H), 7.37 (ddd, *J* = 8.3, 2.5, 1.2 Hz, 2H), 7.17 – 7.12 (m, 1H), 6.99 (td, *J* = 7.5, 0.8 Hz, 1H), 6.93 (d, *J* = 8.1 Hz, 1H), 6.90 (s, 2H), 6.90 – 6.86 (m, 1H), 6.82 (dd, *J* = 8.2, 0.9 Hz, 1H), 6.70 (dq, *J* = 15.9, 1.4 Hz, 1H), 6.21 (dq, *J* = 15.9, 6.6 Hz, 1H), 4.83 (s, 2H), 4.13 – 4.07 (m, 4H), 4.04 (t, *J* = 6.8 Hz, 2H), 3.95 (t, *J* = 6.3 Hz, 2H), 2.25 (s, 3H), 2.23 (s, 6H), 1.85 (ddd, *J* = 14.9, 6.9, 1.8 Hz, 3H), 1.85 – 1.73 (m, 4H), 1.58 – 1.44 (m, 4H).

**$^{13}\text{C}$  NMR** (101 MHz,  $\text{CDCl}_3$ )  $\delta$  157.9, 156.5, 155.7, 140.4, 135.5, 131.9, 131.2, 130.6, 130.1, 130.0, 127.9, 127.0, 126.4, 126.2, 125.7, 121.3, 120.6, 111.8, 111.7, 68.5, 68.1, 51.0, 48.6, 48.2, 29.22, 29.17, 26.0, 25.8, 21.1, 17.5, 14.8.

**$^{19}\text{F}$  NMR** (376 MHz,  $\text{CDCl}_3$ )  $\delta$  -152.61 (dd,  $J$  = 1.2 Hz).

**HRMS** (ESI):  $m/z$  511.3338 ( $[\text{M} - \text{BF}_4]^+$ ,  $\text{C}_{34}\text{H}_{43}\text{N}_2\text{O}_2^+$  calcd. 511.3325).

**EA**: Anal. calcd. for  $\text{C}_{34}\text{H}_{43}\text{BF}_4\text{N}_2\text{O}_2$ : C, 68.28; H, 7.24; F, 12.70; N, 4.68. Found: C, 68.16; H, 7.44; F, 12.61; N, 4.57.

**FT-IR-ATR**: 3063, 2942, 2862, 1642, 1489, 1265, 1052, 856, 732, 702  $\text{cm}^{-1}$ .

**2.10. 3-({2-[(8-{2-[Prop-1-en-1-yl]phenoxy}octyl)oxy]phenyl}methyl)-1-(2,4,6-trimethyl-phenyl)-4,5-dihydro-1 $\lambda$ 5-imidazol-1-ylum tetrafluoroborate (6b)**

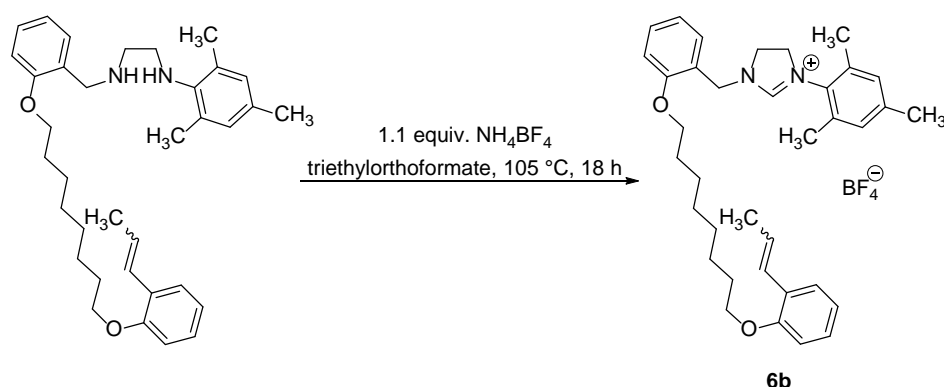

To a 20 mL round-bottomed flask was added 2,4,6-trimethyl-N-{2-[(8-{2-[(prop-1-en-1-yl]phenoxy}octyl)oxy]phenyl}methyl)amino]ethyl}aniline (952 mg, 1.80 mmol) and triethyl orthoformate (12.2 mL, 72.0 mmol), followed by  $\text{NH}_4\text{BF}_4$  (214 mg, 1.98 mmol). The reaction mixture was heated to 105  $^\circ\text{C}$  for 16 h. Next, the reaction mixture was cooled to room temperature and the solvent was evaporated *in vacuo*. The residue was purified by column chromatography (DCM/MeOH 1:0 to 97:3) and further by crystallization from MeOH/Et<sub>2</sub>O mixture providing the desired product as a colorless amorphous solid (1052 mg, **93%** yield, *E/Z* 9:1).

Major isomer (*E*):

$R_f$  = 0.19 ( $\text{CH}_2\text{Cl}_2/\text{MeOH}$  19:1)

**$^1\text{H}$  NMR** (400 MHz,  $\text{CDCl}_3$ )  $\delta$  7.88 (s, 1H), 7.43 – 7.34 (m, 2H), 7.17 – 7.11 (m, 1H), 6.99 (t,  $J$  = 7.2 Hz, 1H), 6.91 (s, 2H), 6.94 – 6.81 (m, 3H), 6.71 (dd,  $J$  = 15.9, 1.5 Hz, 1H), 6.23 (dq,  $J$  = 16.0,

6.6 Hz, 1H), 4.83 (s, 2H), 4.17 – 4.05 (m, 4H), 4.01 (t,  $J = 6.9$  Hz, 2H), 3.95 (t,  $J = 6.5$  Hz, 2H), 2.27 (s, 3H), 2.23 (s, 6H), 1.89 (dd,  $J = 6.6, 1.6$  Hz, 3H), 1.86 – 1.72 (m, 4H), 1.53 – 1.26 (m, 8H).

$^{13}\text{C}$  NMR (101 MHz,  $\text{CDCl}_3$ )  $\delta$  157.9, 157.4, 155.8, 140.5, 135.6, 132.1, 131.2, 130.6, 130.1, 127.9, 127.2, 126.5, 126.2, 125.9, 121.4, 120.69, 120.66, 112.1, 111.9, 68.7, 68.3, 51.1, 48.7, 48.4, 29.38, 29.36, 29.33, 26.2, 26.1, 21.1, 19.1, 17.6.

$^{19}\text{F}$  NMR (376 MHz,  $\text{CDCl}_3$ )  $\delta$  -152.29 (s).

HRMS (ESI):  $m/z$  539.3639 ( $[\text{M} - \text{BF}_4]^+$ ,  $\text{C}_{36}\text{H}_{47}\text{N}_2\text{O}_2^+$  calcd. 539.3638).

EA: Anal. calcd. for  $\text{C}_{34}\text{H}_{43}\text{BF}_4\text{N}_2\text{O}_2$ : C, 69.01; H, 7.56; F, 12.13; N, 4.47. Found: C, 68.86; H, 7.63; F, 12.30; N, 4.69.

FT-IR-ATR: 3090, 3034, 2933, 2856, 1634, 1590, 1449, 1242, 1052, 970, 755  $\text{cm}^{-1}$ .

## 2.11. Benzyldiene(dichloro)(1-{2-([6-[2-(prop-1-en-1-yl)phenoxy]hexyl)oxy]phenyl)methyl}-3-[2,4,6-trimethylphenyl]imidazolidin-2-ylidene)ruthenium (Ru-2<sup>C6</sup>)

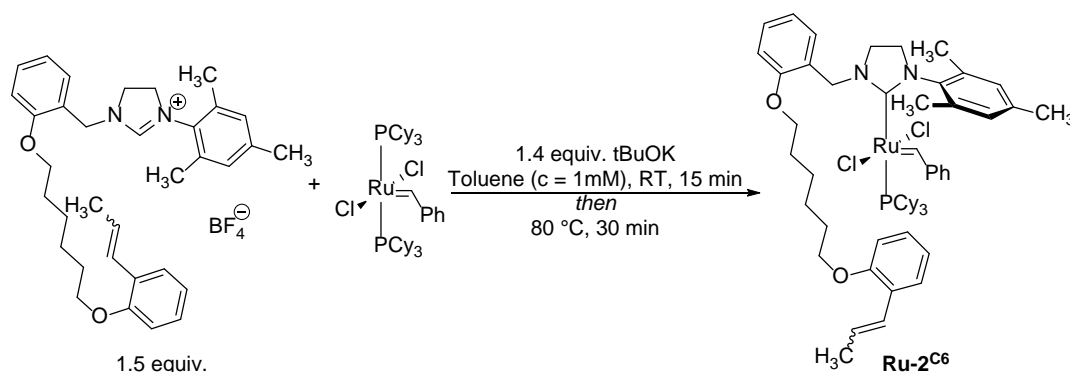

Oven dried Schlenk vessel was evacuated and refilled with argon (3 times). After, 3-([2-([6-[2-(prop-1-en-1-yl)phenoxy]hexyl)oxy]phenyl)methyl]-1-(2,4,6-trimethylphenyl)-4,5-dihydro-1 $\lambda$ 5-imidazol-1-ylidene) tetrafluoroborate (135 mg, 225  $\mu\text{mol}$ ) was added followed by the addition of anh. toluene (15 mL). Next,  $t\text{BuOK}$  (23.6 mg, 210  $\mu\text{mol}$ ) was added and the reaction mixture was stirred at RT for 15 minutes, to generate “ $t$ -butanolate adduct”. Next, (benzyldiene)bis(tricyclohexylphosphine)dichlororuthenium pre-catalyst (127 mg, 150  $\mu\text{mol}$ ) was added in one portion and the reaction mixture was immediately placed in preheated oil bath (80 °C). After 30 minutes TLC has shown full consumption of **Gru-1** pre-catalyst and formation of new complex. The reaction mixture was cooled down to 0 °C, transferred on column chromatography, and eluted with  $n$ -hex/AcOEt (9:1, then 8:2). Fraction with newly formed

complex were collected and evaporated. Crude pre-catalyst was dispersed in *n*-pentane, sonicated for few minutes and placed in freezer (-20 °C) for 20 h. Liquid was decanted and remaining solid was dried *in vacuo* providing red amorphous solid (78 mg, 49% yield).

Major isomer (*E*):

**R<sub>f</sub>** = 0.38 (*n*-hex/AcOEt 8:2)

**<sup>1</sup>H NMR** (400 MHz, CD<sub>2</sub>Cl<sub>2</sub>) δ 18.90 (s, 1H), 8.03 (d, *J* = 6.4 Hz, 1H), 7.42 – 7.35 (m, 2H), 7.34 – 7.22 (m, 2H), 7.17 – 7.08 (m, 4H), 7.02 (t, *J* = 7.4 Hz, 1H), 6.95 (d, *J* = 8.3 Hz, 1H), 6.92 – 6.82 (m, 4H), 6.72 (dd, *J* = 15.9, 1.5 Hz, 1H), 6.24 (ddd, *J* = 15.8, 13.2, 6.6 Hz, 1H), 5.42 (s, 2H), 4.06 (t, *J* = 6.6 Hz, 2H), 4.00 (t, *J* = 6.4 Hz, 2H), 3.70 (s, 4H), 2.31 (d, *J* = 9.9 Hz, 3H), 2.39 – 2.24 (m, 2H), 2.25 – 2.07 (m, 4H), 1.89 (d, *J* = 2.3 Hz, 6H), 1.87 (d, *J* = 1.6 Hz, 3H), 1.97 – 1.78 (m, 2H), 1.67 – 1.45 (m, 18H), 1.24 (dd, *J* = 24.5, 12.1 Hz, 6H), 1.07 (dd, *J* = 23.9, 11.5 Hz, 6H), 1.00 – 0.89 (m, 3H).

**<sup>13</sup>C NMR** (101 MHz, CD<sub>2</sub>Cl<sub>2</sub>) δ 219.0 (d, *J* = 74.1 Hz), 157.8, 156.3, 151.5, 138.0, 137.4, 137.0, 131.4, 130.9, 129.6, 129.3, 129.0, 128.6, 128.2, 127.5, 126.7, 126.6, 126.3, 126.2, 124.0, 121.1, 120.9, 112.5, 111.6, 68.8, 68.7, 54.4, 51.7, 49.1 (d, *J* = 3.2 Hz), 48.6, 35.8 (d, *J* = 60.8 Hz), 31.8 (d, *J* = 15.8 Hz), 29.9, 28.3 (d, *J* = 10.0 Hz), 26.9, 26.6, 21.2, 19.3, 18.7.

**<sup>31</sup>P NMR** (162 MHz, CD<sub>2</sub>Cl<sub>2</sub>) δ 35.2 (s).

**HRMS** (ESI): *m/z* 1051.4373 ([*M* - H]<sup>+</sup>, C<sub>59</sub>H<sub>80</sub>Cl<sub>2</sub>N<sub>2</sub>O<sub>2</sub>PRu<sup>+</sup> calcd. 1051.4378).

**FT-IR-ATR**: 3057, 2923, 2849, 1738, 1569, 1446, 1238, 1004, 896, 749 cm<sup>-1</sup>.

## 2.12. Benzyldiene(dichloro)(1-{[2-(8-[2-(prop-1-en-1-yl)phenoxy]octyl)oxy]phenyl)methyl}-3-[2,4,6-trimethylphenyl]imidazolidin-2-ylidene)ruthenium (Ru-2<sup>C8</sup>)

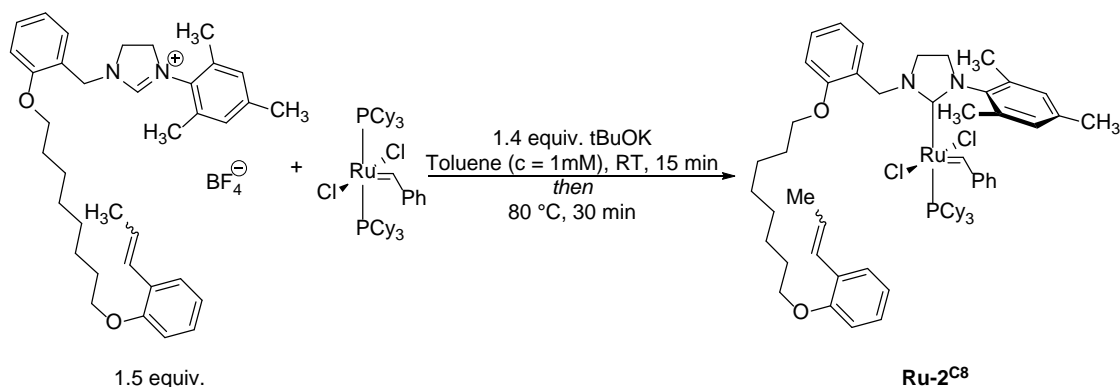

Oven dried Schlenk vessel was evacuated and refilled with argon (3 times). After, 3-({2-[(6-{2-[prop-1-en-1-yl]phenoxy}octyl)oxy]phenyl}methyl)-1-(2,4,6-trimethylphenyl)-4,5-dihydro-1λ5-imidazol-1-ylum tetrafluoroborate (141 mg, 225 μmol) was added follow by addition of anh. toluene (15 mL). Next, *t*BuOK (23.6 mg, 210 μmol) was added and the reaction mixture was stirred at RT for 15 minutes, to generate “*t*-butanolate adduct”. Next, (benzylidene)bis(tri-cyclohexylphosphine)dichlororuthenium pre-catalyst (127 mg, 150 μmol) was added in one portion and the reaction mixture was immediately placed in preheated oil bath (80 °C). After 30 minutes TLC has shown full consumption of **Gru-1** pre-catalyst and formation of new complex. The reaction mixture was cooled down to 0 °C, transferred on column chromatography, and eluted with *n*-hex/AcOEt (9:1, then 8:2). Fraction with newly formed complex were collected, evaporated, and dried *in vacuo* providing red amorphous solid (70 mg, 43% yield).

Major isomer (*E*):

**R<sub>f</sub>** = 0.41 (*n*-hex/AcOEt 8:2).

**<sup>1</sup>H NMR** (400 MHz, CD<sub>2</sub>Cl<sub>2</sub>) δ 18.90 (s, 1H), 8.03 (dd, *J* = 7.5, 1.5 Hz, 1H), 7.42 – 7.36 (m, 2H), 7.34 – 7.29 (m, 1H), 7.17 – 7.10 (m, 3H), 7.03 (td, *J* = 7.4, 0.8 Hz, 1H), 6.95 (d, *J* = 8.3 Hz, 1H), 6.89 – 6.84 (m, 2H), 6.73 (dd, *J* = 15.9, 1.7 Hz, 1H), 6.25 (dq, *J* = 15.9, 6.6 Hz, 1H), 5.42 (s, 2H), 4.05 (t, *J* = 6.6 Hz, 2H), 3.99 (t, *J* = 6.5 Hz, 2H), 3.71 (s, *J* = 27.6 Hz, 4H), 2.38 – 2.26 (m, 5H), 2.26 – 2.09 (m, 4H), 1.90 (s, *J* = 1.6 Hz, 6H), 1.88 (d, *J* = 1.7 Hz, 3H), 1.87 – 1.81 (m, 2H), 1.64 – 1.42 (m, 18H), 1.36 – 1.18 (m, 10H), 1.08 (dd, *J* = 24.5, 12.1 Hz, 6H), 1.01 – 0.91 (m, 3H).

**<sup>13</sup>C NMR** (101 MHz, CD<sub>2</sub>Cl<sub>2</sub>) δ 293.7 (dd, *J* = 25.3, 4.7 Hz), 219.0 (d, *J* = 74.1 Hz), 157.8, 156.3, 151.4 (d, *J* = 1.4 Hz), 138.0, 137.4, 137.0 (d, *J* = 0.4 Hz), 131.3, 130.9, 129.6, 129.3, 128.6, 128.23, 128.20, 127.5, 126.7, 126.5, 126.2, 123.9, 121.0, 120.9, 112.4, 111.6, 68.9, 68.7, 51.7 (d, *J* = 2.2 Hz), 49.1 (d, *J* = 3.3 Hz), 48.6, 34.7, 31.8, 31.7, 29.93 (d, *J* = 4.9 Hz), 29.86 (d, *J* = 6.4 Hz), 28.3 (d, *J* = 10.0 Hz), 26.9 (d, *J* = 5.8 Hz), 26.7 (d, *J* = 1.0 Hz), 22.9, 21.2, 19.3, 18.7, 14.4.

**<sup>31</sup>P NMR** (162 MHz, CD<sub>2</sub>Cl<sub>2</sub>) δ 35.2 (s).

**HRMS** (ESI): *m/z* 1079.4696 ([*M* - H]<sup>+</sup>, C<sub>61</sub>H<sub>84</sub>Cl<sub>2</sub>N<sub>2</sub>O<sub>2</sub>PRu<sup>+</sup> calcd. 1079.4686).

**FT-IR-ATR**: 3057, 2924, 2850, 1738, 1446, 1239, 1112, 1005, 896, 748 cm<sup>-1</sup>.

### 2.13. Polymeric complex Ru-3<sup>C6</sup>

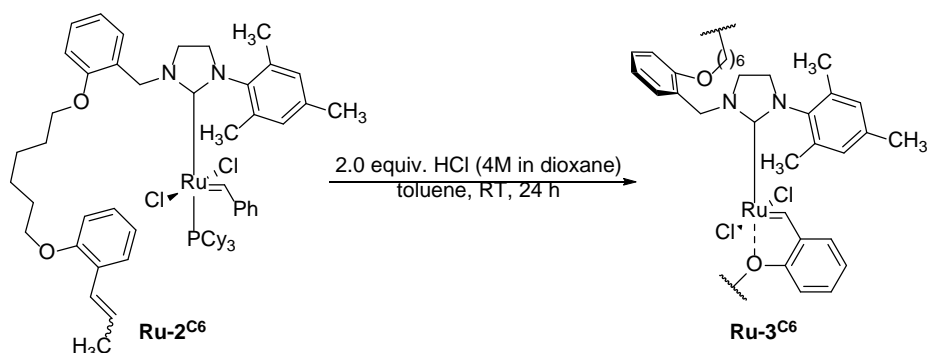

Oven dried Schlenk vessel was evacuated and refilled with argon (3 times). After, benzyldene(dichloro)(1-{[2-({6-[2-(prop-1-en-1-yl)phenoxy]hexyl}oxy)phenyl]methyl}-3-[2,4,6-trimethyl-phenyl]imidazolidin-2-ylidene)ruthenium (137 mg, 130  $\mu\text{mol}$ ) was added follow by addition of anh. toluene (13 mL). Next, 4M solution of HCl in dioxane (65  $\mu\text{L}$ , 260  $\mu\text{mol}$ ) was added and the resulting mixture was stirred at room temperature for 24 h. After, the resulting mixture was collected to the syringe and filtered through syringe filter (PTFE, 0.45  $\mu\text{m}$ ) to remove precipitated tricyclohexylphosphonium chloride. The filtrate was concentrated and dried *in vacuo* providing the desired polymeric complex as a brown amorphous solid (69 mg, 81% yield).

<sup>1</sup>H NMR<sup>1</sup> (400 MHz, CD<sub>2</sub>Cl<sub>2</sub>)  $\delta$  16.26 – 16.17 (m, 1H).

<sup>13</sup>C NMR<sup>2</sup> (101 MHz, CD<sub>2</sub>Cl<sub>2</sub>)  $\delta$  290.4.

MS (MALDI-TOF):  $m/z$  500.1 ([M]<sup>+</sup>, C<sub>27</sub>H<sub>30</sub>N<sub>2</sub>O<sub>3</sub><sup>+</sup> calcd. 500.3) which corresponds to following molecule:

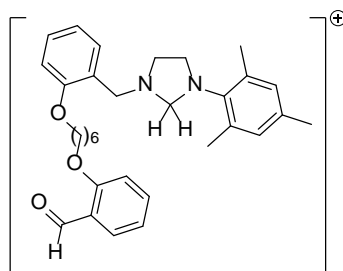

FT-IR-ATR: 3069, 2926, 2852, 1943, 1590, 1450, 1236, 1108, 1004, 850, 751 cm<sup>-1</sup>.

<sup>1</sup> Due to polymeric structure of compound the obtained spectrum resulted in inconsistent data of integrals, thus only benzyldene proton peak was reported.

<sup>2</sup> Due to polymeric structure of compound the obtained spectrum has got very low insensitivity, thus only benzyldene carbon peak was reported, based on HSQC experiment.

## 2.14. Polymeric complex Ru-3<sup>C8</sup>

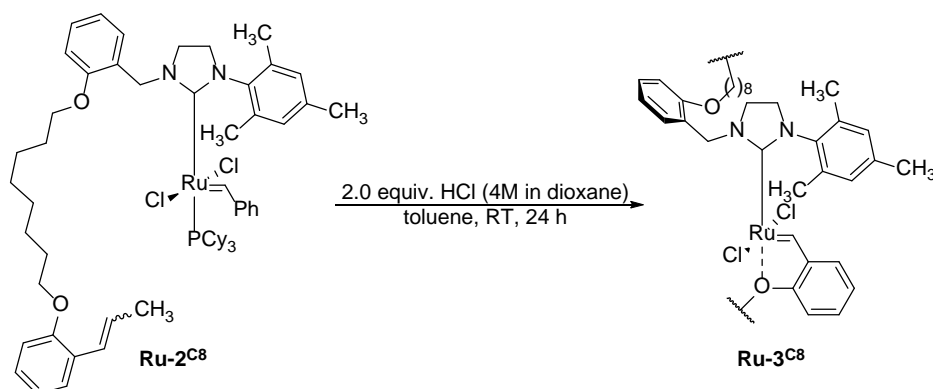

Oven dried Schlenk vessel was evacuated and refilled with argon (3 times). After, benzyldene(dichloro)(1-{[2-({8-[2-(prop-1-en-1-yl)phenoxy]octyl}oxy)phenyl]methyl}-3-[2,4,6-trimethyl-phenyl]imidazolidin-2-ylidene)ruthenium (70 mg, 64.7  $\mu\text{mol}$ ) was added followed by addition of anhydrous toluene (6.5 mL). Next, 4M solution of HCl in dioxane (32.4  $\mu\text{L}$ , 129  $\mu\text{mol}$ ) was added and the resulting mixture was stirred at room temperature for 24 h. After, the resulting mixture was collected to the syringe and filtered through syringe filter (PTFE, 0.45  $\mu\text{m}$ ) to remove precipitated tricyclohexylphosphonium chloride. The filtrate was concentrated and dried *in vacuo* providing the desired polymeric complex as a brown amorphous solid (43 mg, 97% yield).

<sup>1</sup>H NMR<sup>3</sup> (400 MHz, CD<sub>2</sub>Cl<sub>2</sub>)  $\delta$  16.16 (s, 1H).

<sup>13</sup>C NMR<sup>4</sup> (101 MHz, CD<sub>2</sub>Cl<sub>2</sub>)  $\delta$  290.4.

MS (MALDI-TOF):  $m/z$  528.2 ([M]<sup>+</sup>, C<sub>27</sub>H<sub>30</sub>N<sub>2</sub>O<sub>3</sub><sup>+</sup> calcd. 528.3) which corresponds to following molecule:

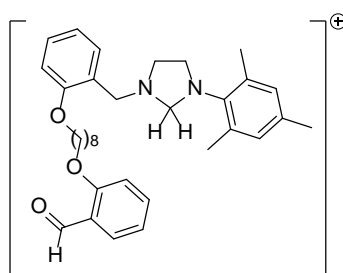

FT-IR-ATR: 3065, 2925, 2852, 1937, 1647, 1452, 1238, 1107, 1045, 852, 750 cm<sup>-1</sup>.

<sup>3</sup> Due to polymeric structure of compound the obtained spectrum resulted in inconsistent data of integrals, thus only benzyldene proton peak was reported.

<sup>4</sup> Due to polymeric structure of compound the obtained spectrum has got very low insensitivity, thus only benzyldene carbon peak was reported, based on HSQC experiment.

### 3. Catalytic activity studies

#### 3.1. Reaction course plots

Oven dried Schlenk vessel was evacuated and refilled with argon (3 times). After, diethyl diallylmalonate (123  $\mu$ L, 500  $\mu$ mol) and 1,2,4,5-tetramethylbenzene (67.8 mg, 500  $\mu$ mol) were added follow by addition of anh. toluene (5 mL). Small sample of the mixture (ca. 50  $\mu$ L) was aliquoted as a “sample zero”. Next, the corresponding ruthenium complex **Ru-3<sup>C6</sup>** or **Ru-4** (1 mol%, 5.0  $\mu$ mol) was added in one portion to the reaction mixture and the vessel was immediately placed in preheated oil bath (40, 60 or 80 °C). The samples were aliquoted in time intervals and measured using GC. The conversion was calculated based on substrate/internal standard ratio of peak area using following equation:

$$Conv[\%] = \left( 1 - \frac{[A_{subs}]^t \cdot [A_{IS}]^{t=0}}{[A_{subs}]^{t=0} \cdot [A_{IS}]^t} \right) \cdot 100$$

**Equation 1.** Equation of conversion determined using GC analysis.  $[A_{subs}]^t$  – area of substrate peak at certain time;  $[A_{subs}]^{t=0}$  – area of substrate peak at “time zero”;  $[A_{IS}]^t$  – area of internal standard (1,2,4,5-tetramethylbenzene) peak at certain time;  $[A_{IS}]^{t=0}$  – area of internal standard (1,2,4,5-tetramethylbenzene) peak at “time zero”.

GC data of experiments:

**Table S1.** Gas chromatography data.  $A_{IS}$  – area of internal standard signal;  $A_{subs}$  – area of substrate signal; nd – not detected.

| temp. = 40 °C |          |            |           |                    |          |            |           |
|---------------|----------|------------|-----------|--------------------|----------|------------|-----------|
| Ru-4          |          |            |           | Ru-3 <sup>C6</sup> |          |            |           |
| Time [min]    | $A_{IS}$ | $A_{subs}$ | Conv. [%] | Time [min]         | $A_{IS}$ | $A_{subs}$ | Conv. [%] |
| 0             | 96826    | 99827      | -         | 0                  | 114942   | 108044     | -         |
| 15            | 126807   | 9557       | 92.7      | 15                 | 122701   | 89839      | 22.1      |
| 30            | 245222   | 14032      | 94.9      | 30                 | 200932   | 138676     | 26.6      |
| 60            | 238567   | 9849       | 96.0      | 60                 | 243516   | 134365     | 41.3      |
| 120           | 275166   | 8139       | 97.1      | 120                | 310181   | 106121     | 63.6      |
| 240           | 310913   | 6361       | 98.0      | 240                | 164517   | 27943      | 81.9      |
| 360           | 140794   | 2423       | 98.3      | 360                | 151564   | 20112      | 85.9      |

| temp. = 60 °C |          |            |           |                    |          |            |           |
|---------------|----------|------------|-----------|--------------------|----------|------------|-----------|
| Ru-4          |          |            |           | Ru-3 <sup>C6</sup> |          |            |           |
| Time [min]    | $A_{IS}$ | $A_{subs}$ | Conv. [%] | Time [min]         | $A_{IS}$ | $A_{subs}$ | Conv. [%] |
| 0             | 144277   | 137759     | -         | 0                  | 114495   | 115013     | -         |
| 15            | 124842   | 1109       | 99.1      | 15                 | 121691   | 59098      | 51.7      |
| 30            | 229135   | 982        | 99.6      | 30                 | 236365   | 94687      | 60.1      |
| 60            | 317479   | 988        | 99.7      | 60                 | 275613   | 65806      | 76.2      |
| 120           | 309669   | 914        | 99.7      | 120                | 305245   | 23014      | 92.5      |
| 240           | 372752   | 739        | 99.8      | 240                | 188109   | 2533       | 98.7      |
| 360           | 6553.22  | 55.67      | 99.1      | 360                | 126647   | 865        | 99.3      |

| temp. = 80 °C |          |            |           |                    |          |            |           |
|---------------|----------|------------|-----------|--------------------|----------|------------|-----------|
| Ru-4          |          |            |           | Ru-3 <sup>C6</sup> |          |            |           |
| Time [min]    | $A_{IS}$ | $A_{subs}$ | Conv. [%] | Time [min]         | $A_{IS}$ | $A_{subs}$ | Conv. [%] |
| 0             | 185966   | 190570     | -         | 0                  | 308475   | 339218     | -         |
| 5             | 192044   | 1316       | 99.3      | 5                  | 235121   | 66689      | 74.2      |
| 10            | 223712   | 582        | 99.7      | 10                 | 306287   | 44106      | 86.9      |
| 15            | 260977   | 242        | 99.9      | 15                 | 164355   | 15015      | 91.7      |
| 30            | 177460   | 126        | 99.9      | 30                 | 141438   | 5282       | 96.6      |
| 60            | 151972   | nd         | 100.0     | 60                 | 198325   | 2935       | 98.7      |
| 120           | 117177   | nd         | 100.0     | 120                | 103596   | 560        | 99.5      |
| 240           | 22425    | nd         | 100.0     | 240                | 292547   | 529        | 99.8      |
| 360           | 331942   | nd         | 100.0     | 360                | 308640   | 212        | 99.9      |

### 3.2. Recycling of polymeric ruthenium complexes

Oven dried Schlenk vessel was evacuated and refilled with argon (3 times). After, diethyl diallylmalonate (1233  $\mu\text{L}$ , 5.0 mmol) and 1,2,4,5-tetramethylbenzene (678 mg, 5.0 mmol) were added follow by addition of anh. toluene (25 mL). Small sample of the mixture (ca. 50  $\mu\text{L}$ ) was aliquoted as a “sample zero”. Next, the ruthenium complex **Ru-3<sup>C6</sup>** (32.7 mg, 0.05 mmol, 1 mol%) was added in one portion to the reaction mixture and the vessel was immediately placed in preheated oil bath (80 °C). After 2 hours the sample for GC analysis was taken and the resulting mixture was concentrated *in vacuo* to dryness. 10 mL of *n*-pentane was added to precipitate polymeric ruthenium complex. After centrifugation, the liquid was decanted (it was repeated 4 more times). The remaining polymeric complex was dried *in vacuo* overnight and used in the next run. The next run was re-scaled based on the amount of recovered catalyst (Table S2). The conversion was calculated using Equation 1 (Table S3).

**Table S2.** Setup of recycling reactions with reagent amounts.

| Run | Scale [mmol] | <b>Ru-3<sup>C6</sup></b> [mg] | DEDAM [ $\mu\text{L}$ ] | IS [mg] | Toluene [mL] | Conv. [%] | Yield of recycled <b>Ru-3<sup>C6</sup></b> [%] |
|-----|--------------|-------------------------------|-------------------------|---------|--------------|-----------|------------------------------------------------|
| 1   | 5.00         | 32.7                          | 1233                    | 678.0   | 25.0         | >99       | 38%                                            |
| 2   | 1.91         | 12.5                          | 471.0                   | 259.0   | 9.55         | 95        | 66%                                            |
| 3   | 1.27         | 8.3                           | 313.2                   | 172.2   | 6.35         | 57        |                                                |

**Table S3.** Gas chromatography data.  $A_{\text{IS}}$  – area of internal standard signal;  $A_{\text{subs}}$  – area of substrate signal.

| Run 1      |                 |                   |           |
|------------|-----------------|-------------------|-----------|
| Time [min] | $A_{\text{IS}}$ | $A_{\text{subs}}$ | Conv. [%] |
| 0          | 140774          | 168516            | -         |
| 120        | 164683          | 850               | 99.6      |
| Run 2      |                 |                   |           |
| Time [min] | $A_{\text{IS}}$ | $A_{\text{subs}}$ | Conv. [%] |
| 0          | 282907          | 316837            | -         |
| 120        | 175684          | 10229             | 94.8      |
| Run 3      |                 |                   |           |
| Time [min] | $A_{\text{IS}}$ | $A_{\text{subs}}$ | Conv. [%] |
| 0          | 303268          | 321662            | -         |
| 120        | 469530          | 212691            | 57.3      |

## 4. RCM experiments and products analysis

### 4.1. General procedure of RCM reactions

Oven dried Schlenk vessel was evacuated and refilled with argon (3 times). Then substrate and anhydrous toluene was added. Next, ruthenium complex was added in one portion, reaction vessel was placed in preheated oil bath (80 °C), and the reaction mixture was stirred upon certain time. After the reaction mixture was cooled down to room temperature, transferred to round-bottom flask, and all the volatiles were removed *in vacuo*. The resulting crude mixture was purified by column chromatography on silica or by precipitation.

### 4.2. 1-Tosyl-2,5-dihydro-1*H*-pyrrole (**8b**)

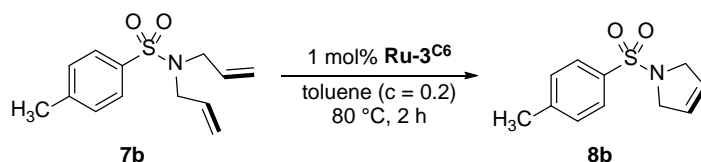

The reaction was set up based on general procedure in 1.0 mmol scale using *N,N*-diallyltosylamide (**7b**) (251 mg, 1.0 mmol), **Ru-3<sup>C6</sup>** complex (6.55 mg, 0.01 mmol) in toluene (5 mL) for 2 h at 80 °C. The product was purified by column chromatography (SiO<sub>2</sub>, *n*-hex/AcOEt 17:3) providing the desired product **8b** as a colorless solid (212 mg, 95% yield).

**<sup>1</sup>H NMR** (400 MHz, CDCl<sub>3</sub>) δ 7.74 – 7.69 (m, 2H), 7.35 – 7.28 (m, 2H), 5.66 – 5.63 (m, 2H), 4.13 – 4.10 (m, 4H), 2.42 (s, 3H).

**<sup>13</sup>C NMR** (101 MHz, CDCl<sub>3</sub>) δ 143.6, 134.4, 129.9, 127.5, 125.6, 55.0, 21.7.

Spectral data are in accordance to the literature.<sup>3</sup>

### 4.3. (2,5-Dihydro-1*H*-pyrrol-1-yl)(3-fluorophenyl)methanone (**8c**)

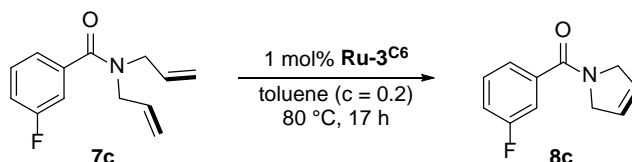

The reaction was set up based on general procedure in 1.0 mmol scale using *N,N*-diallyl-3-fluorobenzamide (**7c**) (219 mg, 1.0 mmol), **Ru-3<sup>C6</sup>** complex (6.55 mg, 0.01 mmol) in toluene (5 mL) for 17 h at 80 °C. The product was purified by column chromatography (SiO<sub>2</sub>, *n*-hex/AcOEt 19:1 to 3:1) providing the desired product **8c** as a colorless liquid (86 mg, 45% yield).

**<sup>1</sup>H NMR** (400 MHz, CDCl<sub>3</sub>) δ 7.42 – 7.35 (m, 1H), 7.30 (dt, *J* = 7.6, 1.3 Hz, 1H), 7.23 (ddd, *J* = 9.0, 2.6, 1.5 Hz, 1H), 7.12 (tdd, *J* = 8.4, 2.6, 1.1 Hz, 1H), 5.94 – 5.88 (m, 1H), 5.78 – 5.71 (m, 1H), 4.44 (ddd, *J* = 5.8, 4.0, 2.1 Hz, 2H), 4.20 (ddd, *J* = 5.8, 4.0, 2.1 Hz, 2H).

**<sup>13</sup>C NMR** (101 MHz, CDCl<sub>3</sub>) δ 168.5 (d, *J* = 2.4 Hz), 162.6 (d, *J* = 247.8 Hz), 138.9 (d, *J* = 6.9 Hz), 130.4 (d, *J* = 8.0 Hz), 126.1, 125.2, 122.7 (d, *J* = 3.2 Hz), 117.1 (d, *J* = 21.1 Hz), 114.27 (d, *J* = 22.8 Hz), 55.9, 53.6.

**<sup>19</sup>F NMR** (376 MHz, CDCl<sub>3</sub>) δ -112.0 (td, *J* = 8.8, 5.6 Hz).

Spectral data are in accordance to the literature.<sup>4</sup>

#### 4.4. (2,5-Dihydro-1*H*-pyrrol-1-yl)(4-bromophenyl)methanone (8d)

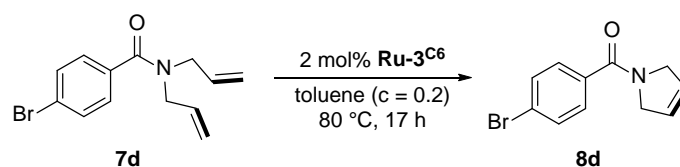

The reaction was set up based on general procedure in 0.5 mmol scale using *N,N*-diallyl-4-bromobenzamide (**7d**) (140 mg, 0.5 mmol), **Ru-3C<sub>6</sub>** complex (6.55 mg, 0.01 mmol) in toluene (2.5 mL) for 17 h at 80 °C. The product was purified by column chromatography (SiO<sub>2</sub>, *n*-hex/AcOEt 9:1 to 3:1) providing the desired product **8d** as an off-white solid (75 mg, 60% yield).

**<sup>1</sup>H NMR** (400 MHz, CDCl<sub>3</sub>) δ 7.57 – 7.52 (m, 2H), 7.43 – 7.38 (m, 2H), 5.91 (dp, *J* = 6.4, 2.1 Hz, 1H), 5.74 (dp, *J* = 6.3, 2.1 Hz, 1H), 4.44 (ddd, *J* = 6.1, 4.1, 2.1 Hz, 2H), 4.19 (ddd, *J* = 6.1, 4.1, 2.1 Hz, 2H).

**<sup>13</sup>C NMR** (101 MHz, CDCl<sub>3</sub>) δ 168.9, 135.7, 131.8, 128.7, 126.2, 125.2, 124.4, 55.9, 53.6.

Spectral data are in accordance to the literature.<sup>5</sup>

#### 4.5. (2,5-Dihydro-1*H*-pyrrol-1-yl)[4-(dimethylamino)phenyl]methanone (8e)

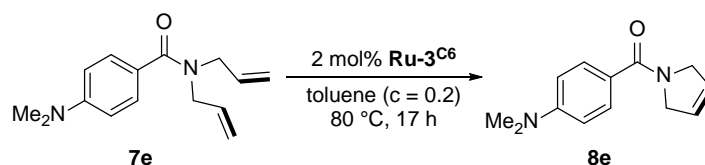

The reaction was set up based on general procedure in 0.5 mmol scale using *N,N*-diallyl-4-(dimethylamino)benzamide (**7e**) (122 mg, 0.5 mmol), **Ru-3<sup>C6</sup>** complex (6.55 mg, 0.01 mmol) in toluene (2.5 mL) for 17 h at 80 °C. The product was purified by column chromatography (SiO<sub>2</sub>, *n*-hex/AcOEt 7:3 to 4:6) providing the desired product **8e** as an off-white solid (77 mg, 71% yield).

**<sup>1</sup>H NMR** (400 MHz, CDCl<sub>3</sub>) δ 7.55 – 7.49 (m, 2H), 6.70 – 6.64 (m, 2H), 5.89 (br s, 1H), 5.76 (br s, 1H), 4.45 (br s, 2H), 4.34 (br s, 2H), 3.00 (s, 6H).

**<sup>13</sup>C NMR** (101 MHz, CDCl<sub>3</sub>) δ 170.3, 151.6, 129.2, 126.2, 125.4, 123.8, 111.1, 56.1, 53.8, 40.3.

Spectral data are in accordance to the literature.<sup>9</sup>

#### 4.6. Benzyl 2-methyl-2,3,4,7-tetrahydro-1*H*-azepine-1-carboxylate (**8f**)

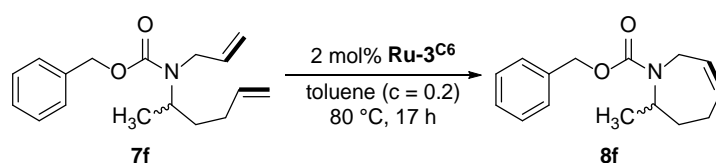

The reaction was set up based on general procedure in 0.5 mmol scale using benzyl allyl(hex-5-en-2-yl)carbamate (**7f**) (137 mg, 0.5 mmol), **Ru-3<sup>C6</sup>** complex (6.55 mg, 0.01 mmol) in toluene (2.5 mL) for 17 h at 80 °C. The product was purified by column chromatography (SiO<sub>2</sub>, *n*-hex/AcOEt 9:1 to 6:4) providing the desired product **8f** as a colorless liquid (119 mg, 97% yield).

**<sup>1</sup>H NMR** (400 MHz, CDCl<sub>3</sub>) δ 7.40 – 7.27 (m, 5H), 5.75 – 5.61 (m, 2H), 5.14 (dd, *J* = 7.0, 2.6 Hz, 2H), 4.48 – 4.22 (m, 1H), 4.17 (ddd, *J* = 54.7, 17.4, 5.5 Hz, 1H), 3.65 – 3.56 (m, 1H), 2.27 – 2.07 (m, 2H), 1.93 – 1.66 (m, 2H), 1.15 (dd, *J* = 6.4, 3.6 Hz, 3H).

**<sup>13</sup>C NMR** (101 MHz, CDCl<sub>3</sub>) δ 156.2, 137.4, 131.9, 128.5, 128.0, 127.8, 127.6, 66.9, 52.5, 39.3, 34.1, 27.1, 19.3; (*major diastereoisomer*).

Spectral data are in accordance to the literature.<sup>10</sup>

**4.7. 5-(5-((2,5-Dihydro-1*H*-pyrrol-1-yl)sulfonyl)-2-ethoxyphenyl)-1-methyl-3-propyl-1,6-dihydro-7*H*-pyrazolo[4,3-*d*]pyrimidin-7-one (8g)**

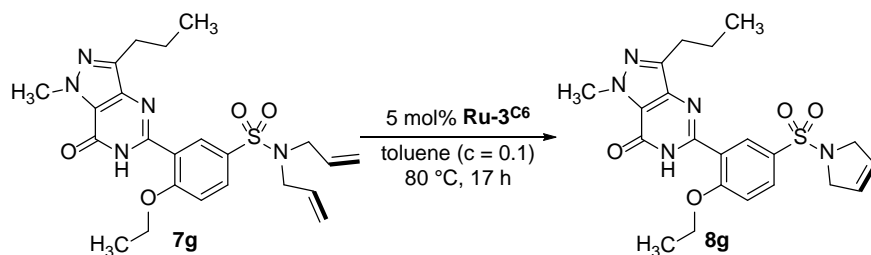

The reaction was set up based on general procedure in 0.5 mmol scale using benzyl *N,N*-diallyl-4-ethoxy-3-(1-methyl-7-oxo-3-propyl-6,7-dihydro-1*H*-pyrazolo[4,3-*d*]pyrimidin-5-yl)benzenesulfonamide (**7g**) (241 mg, 0.5 mmol), **Ru-3<sup>C6</sup>** complex (16.4 mg, 0.025 mmol) in toluene (5 mL) for 17 h at 80 °C. The product was purified by precipitation from toluene at –20 °C providing the desired product **8g** as a brownish solid (155 mg, 70% yield).

**<sup>1</sup>H NMR** (400 MHz, CDCl<sub>3</sub>) δ 10.82 (s, 1H), 8.88 (d, *J* = 2.4 Hz, 1H), 7.91 (dd, *J* = 8.7, 2.4 Hz, 1H), 7.14 (d, *J* = 8.8 Hz, 1H), 5.69 (s, 2H), 4.36 (q, *J* = 6.9 Hz, 2H), 4.26 (s, 3H), 4.18 (s, 4H), 2.93 (t, *J* = 7.5 Hz, 2H), 1.91 – 1.80 (m, 2H), 1.63 (t, *J* = 7.0 Hz, 3H), 1.02 (t, *J* = 7.4 Hz, 3H).

**<sup>13</sup>C NMR** (101 MHz, CDCl<sub>3</sub>) δ 159.3, 153.7, 147.1, 146.7, 138.5, 131.5, 131.1, 130.7, 125.6, 124.6, 121.3, 113.3, 66.2, 55.1, 38.4, 27.8, 22.4, 14.7, 14.2.

Spectral data are in accordance to the literature.<sup>8</sup>

## 5. NMR spectra of compounds

### $^1\text{H}$ NMR (400 MHz), $\text{CDCl}_3$

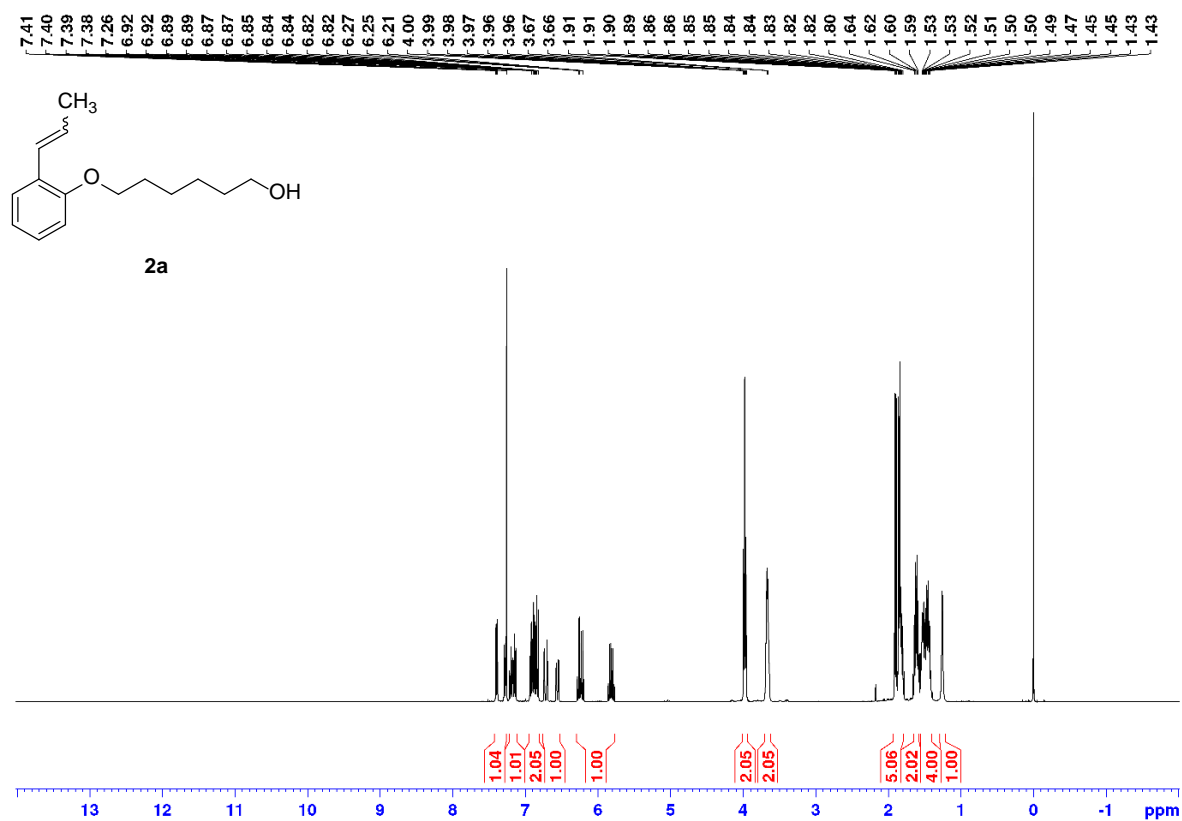

### $^{13}\text{C}$ NMR (101 MHz), $\text{CDCl}_3$

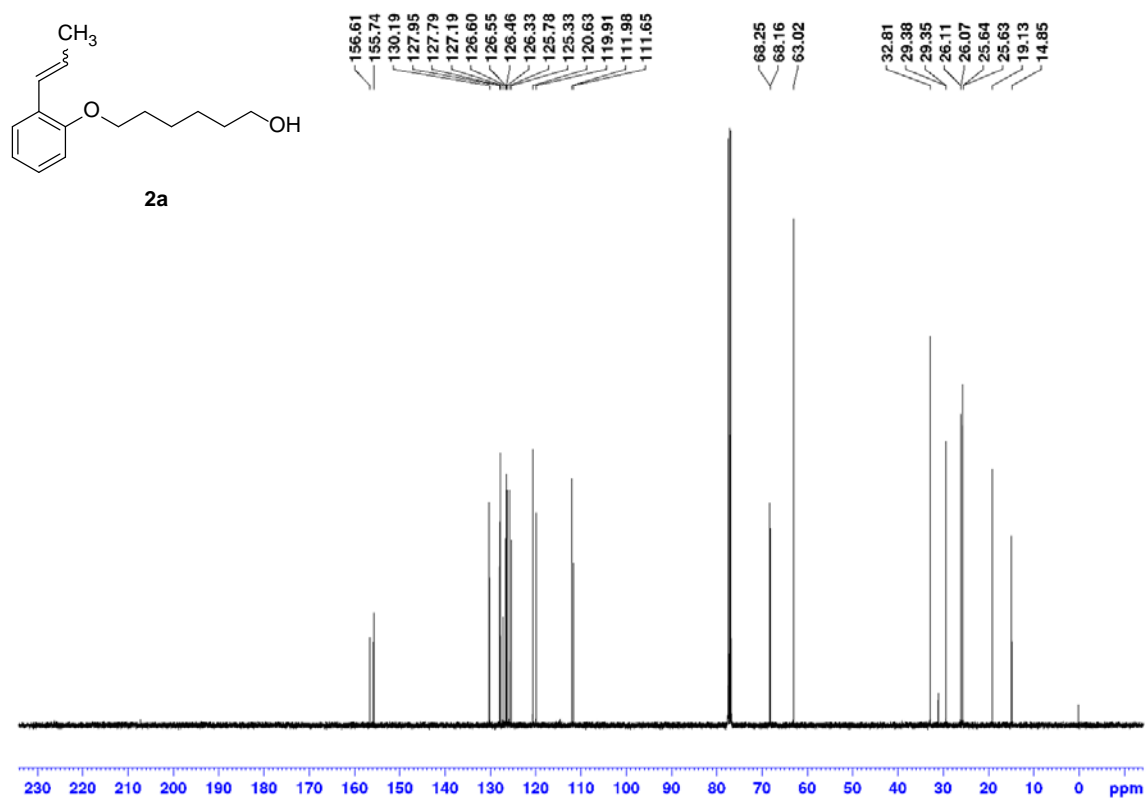

**<sup>1</sup>H NMR (400 MHz), CDCl<sub>3</sub>**

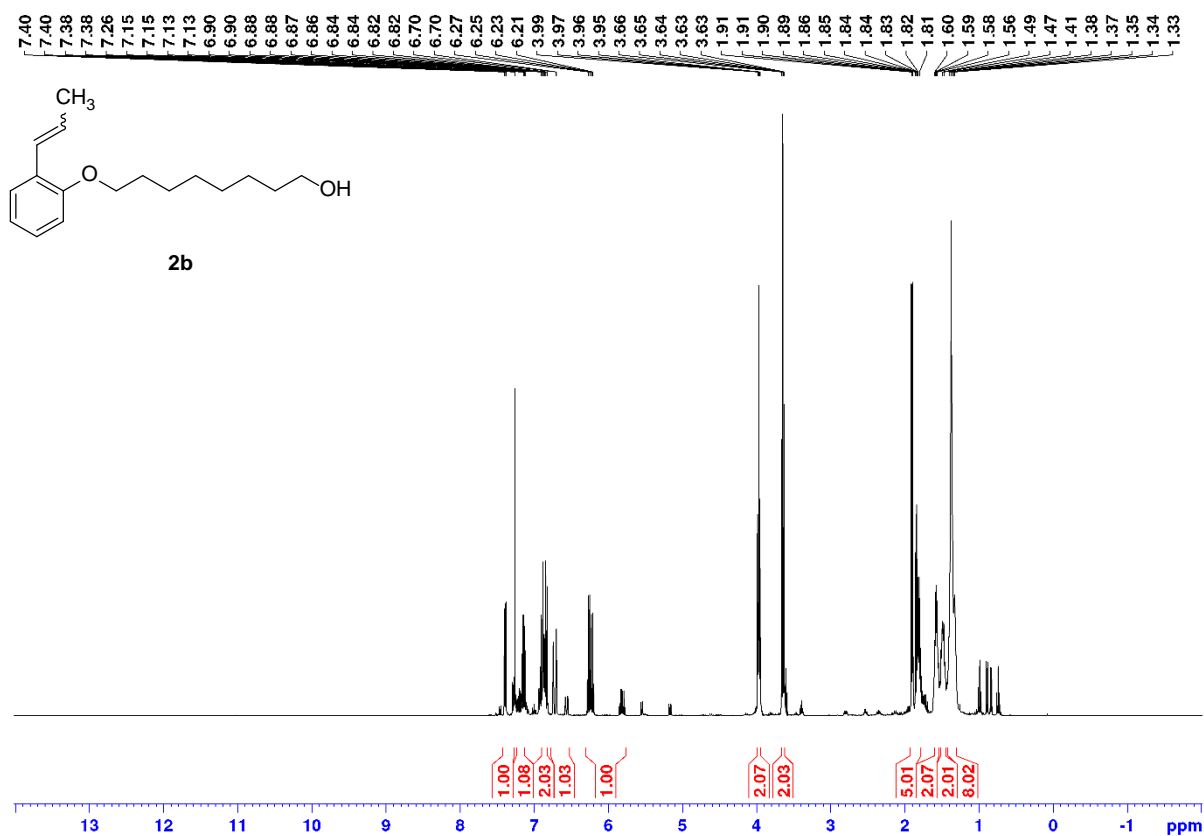

**<sup>13</sup>C NMR (101 MHz), CDCl<sub>3</sub>**

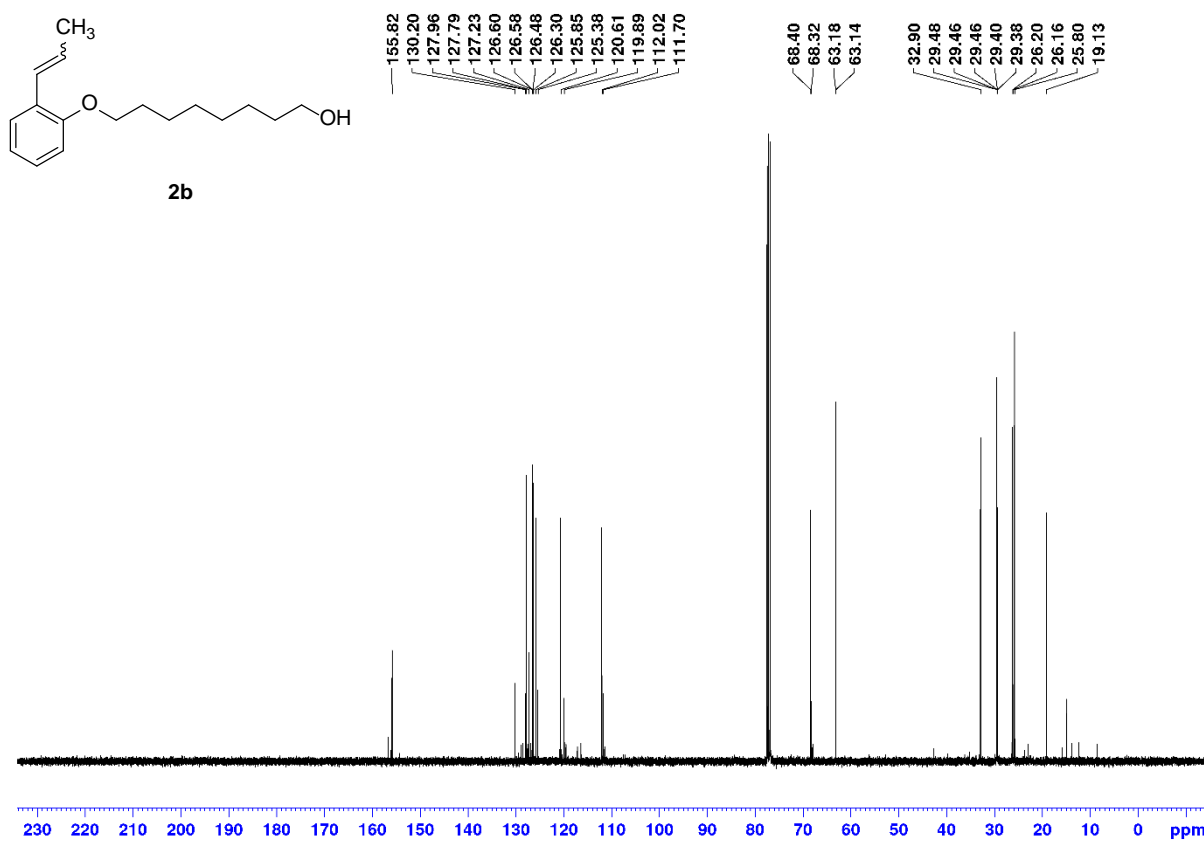

**<sup>1</sup>H NMR (400 MHz), CDCl<sub>3</sub>**

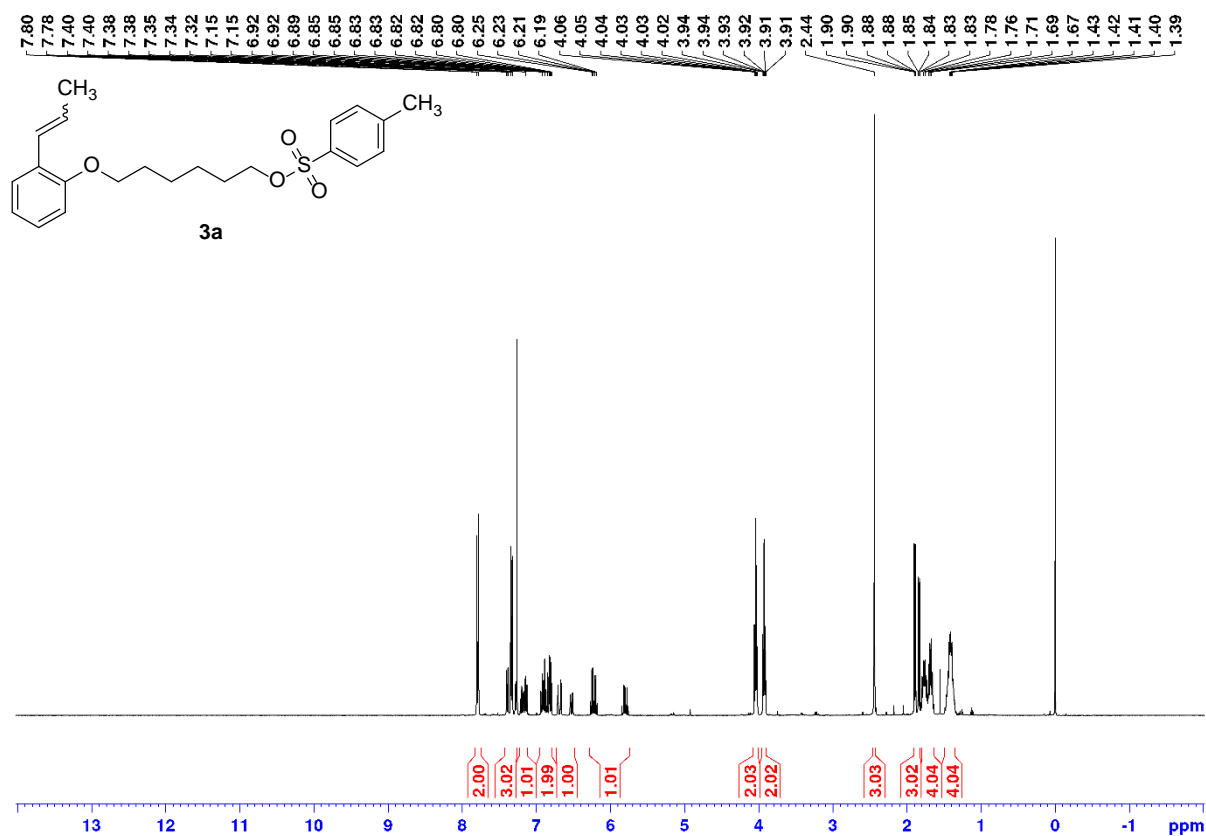

**<sup>13</sup>C NMR (101 MHz, CDCl<sub>3</sub>) spectrum of compound 3a.**

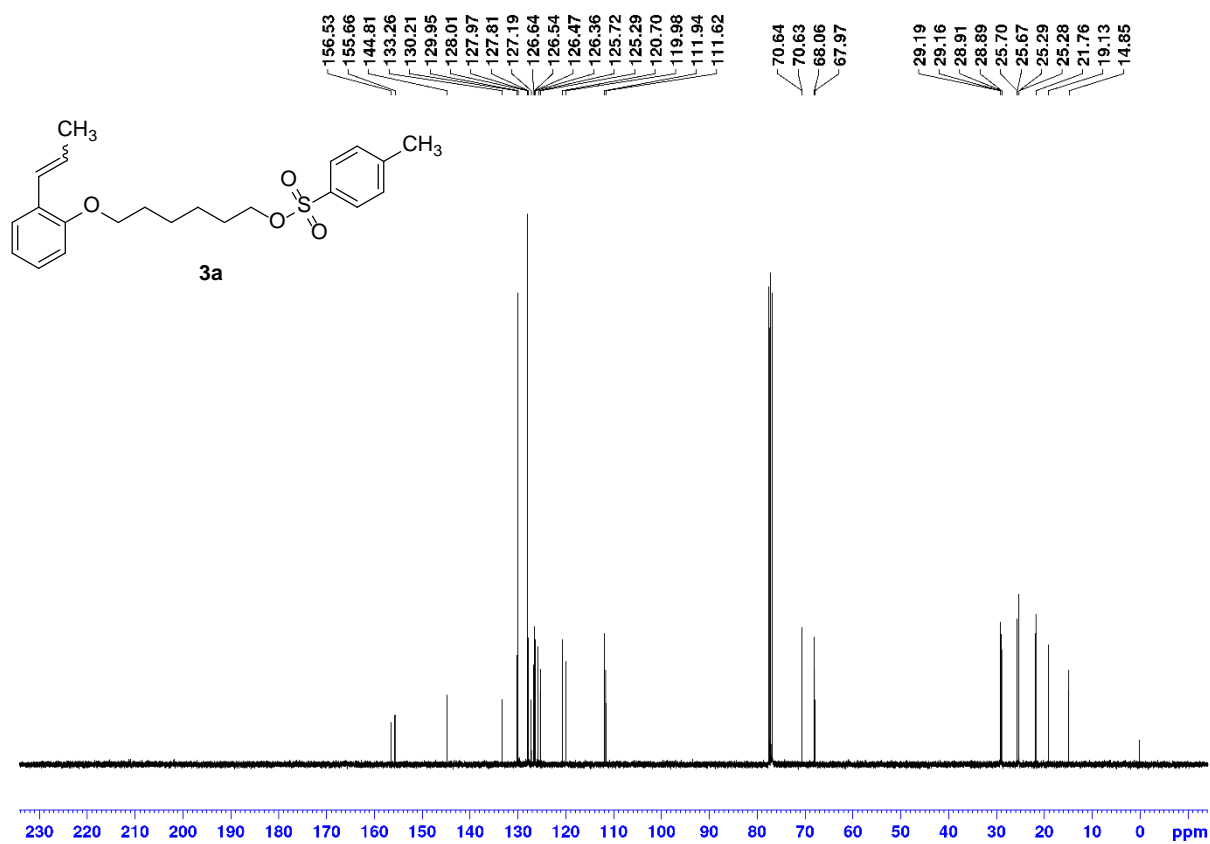

**<sup>1</sup>H NMR (400 MHz), CDCl<sub>3</sub>**

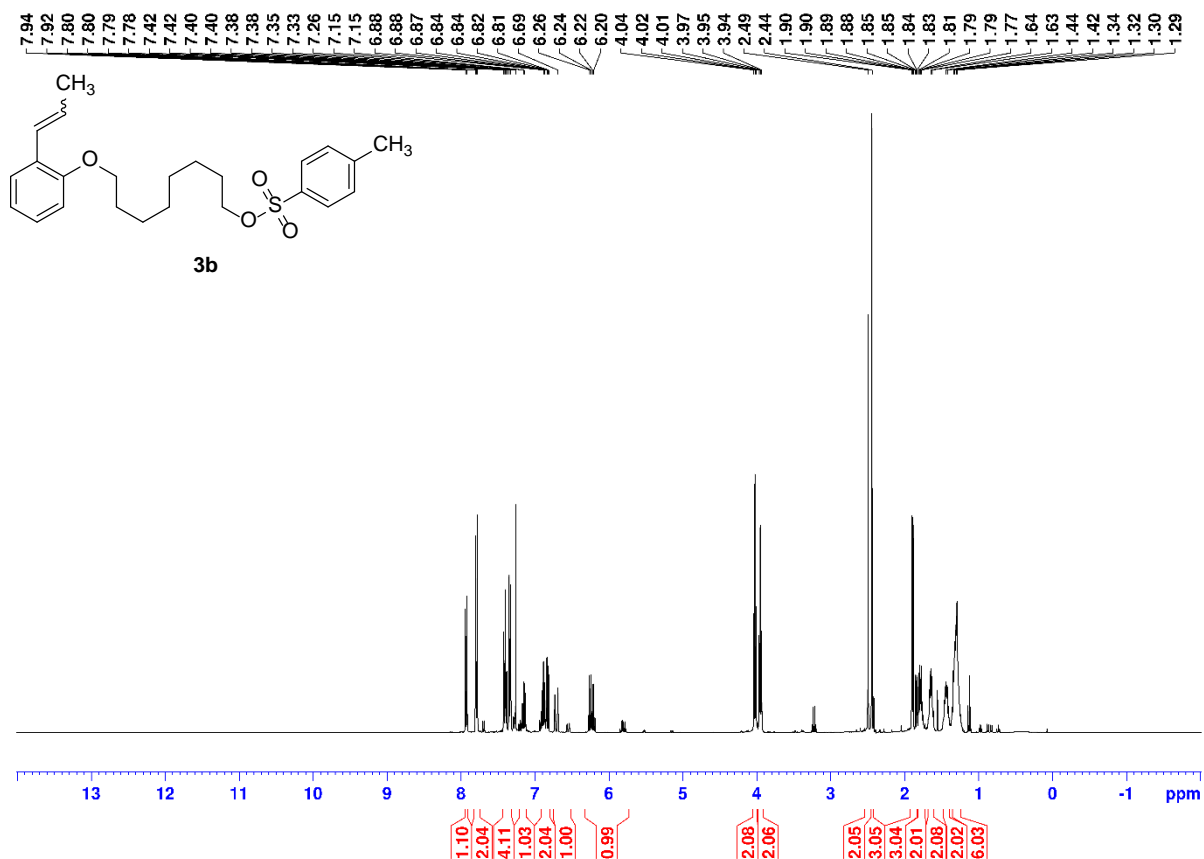

**<sup>13</sup>C NMR (101 MHz), CDCl<sub>3</sub>**

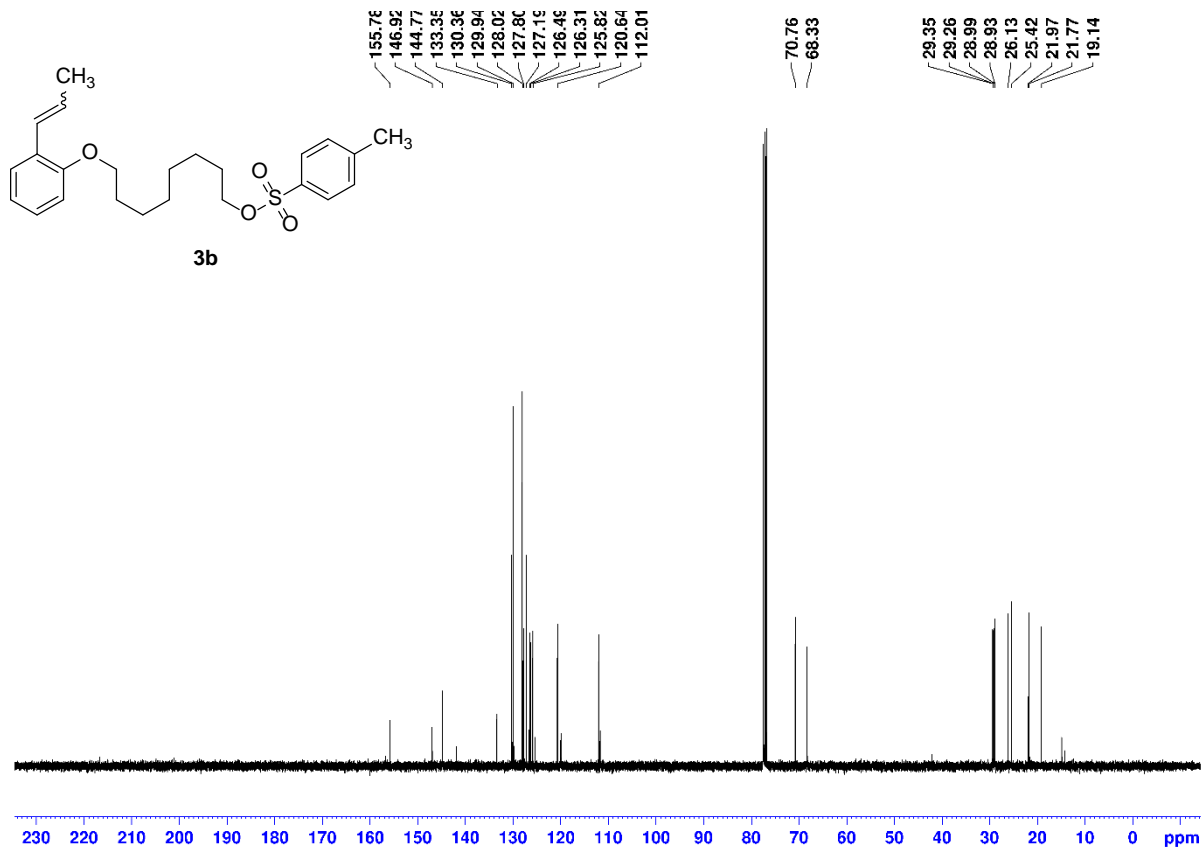

**$^1\text{H}$  NMR (400 MHz),  $\text{CDCl}_3$**

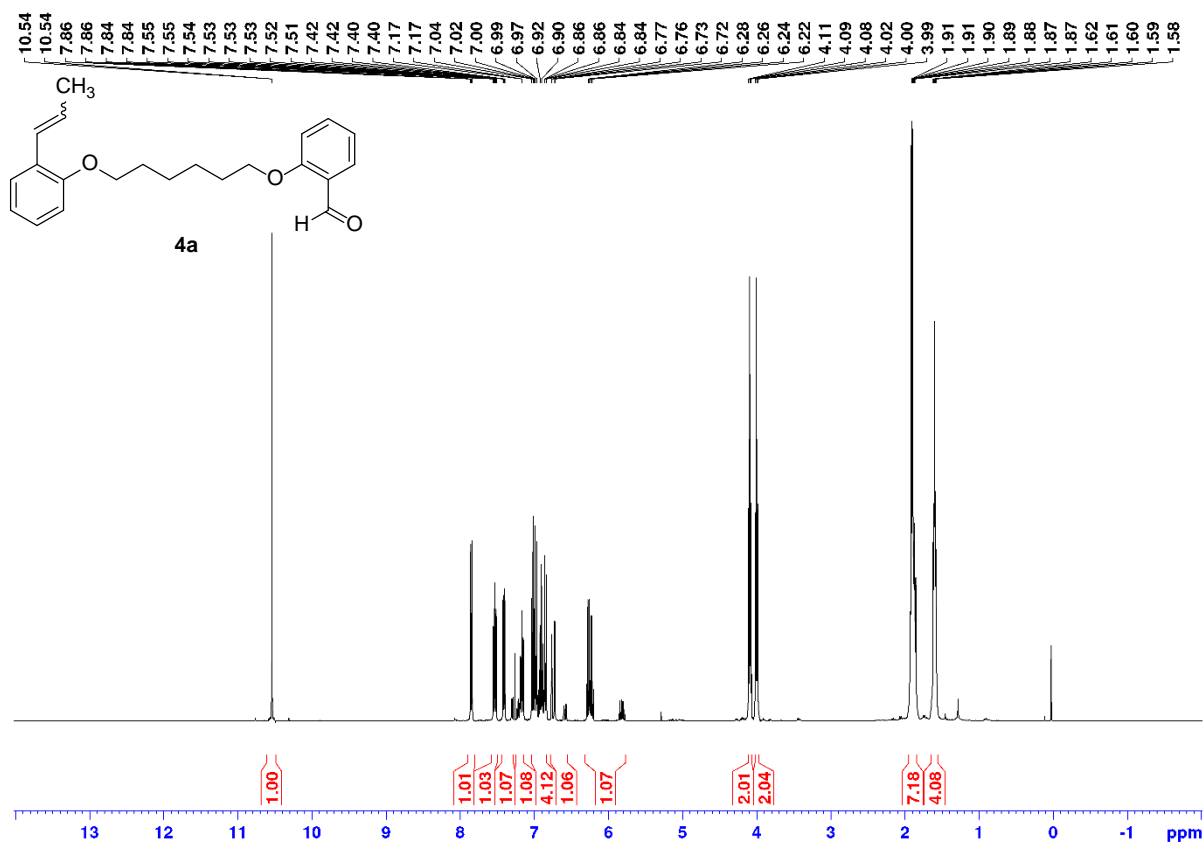

**$^{13}\text{C}$  NMR (101 MHz),  $\text{CDCl}_3$**

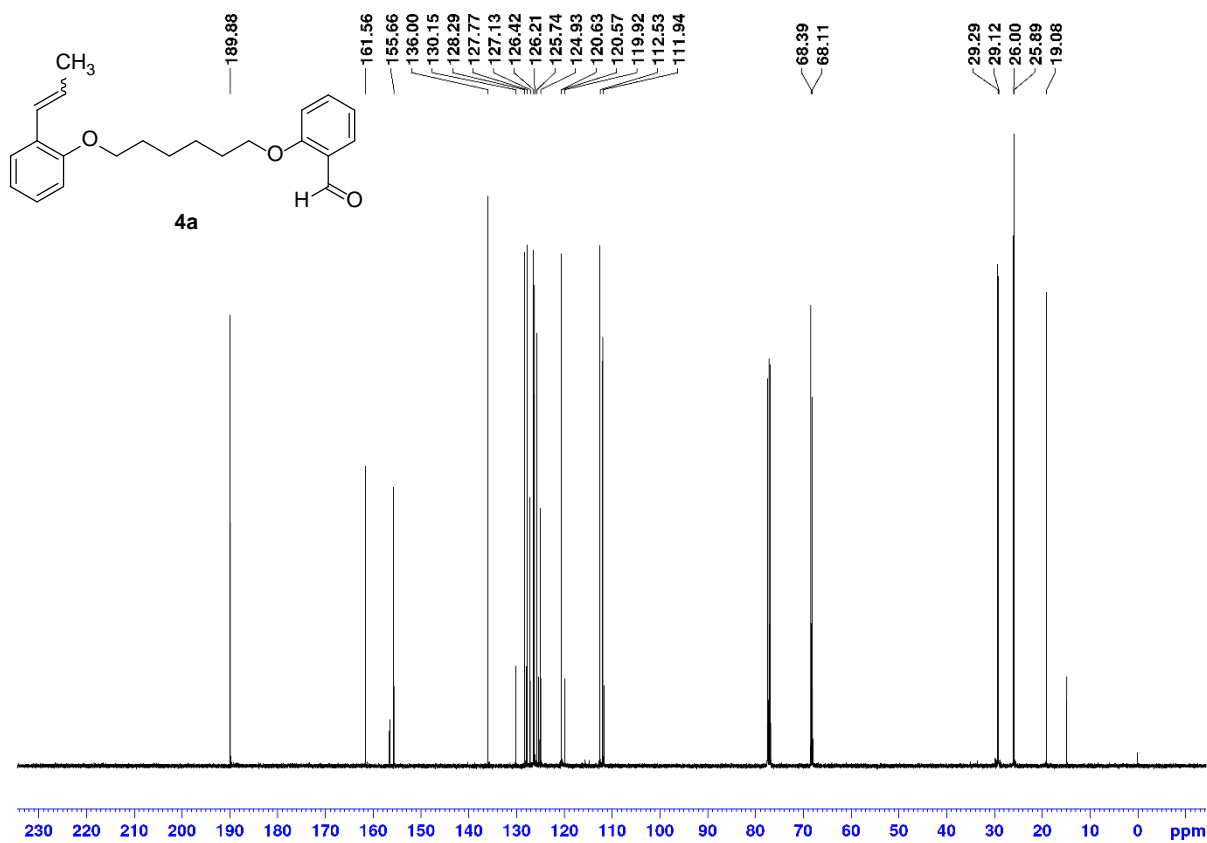

**<sup>1</sup>H NMR (400 MHz), CDCl<sub>3</sub>**

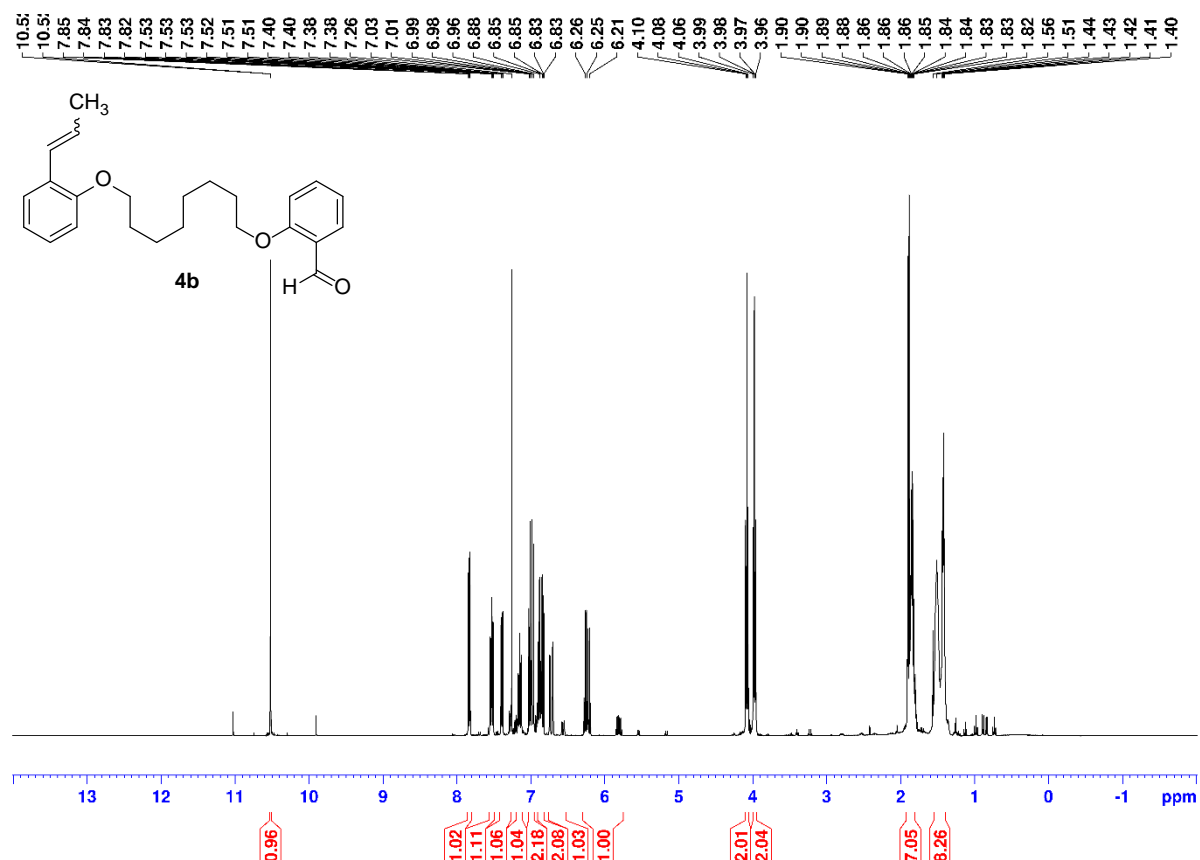

**<sup>13</sup>C NMR (101 MHz), CDCl<sub>3</sub>**

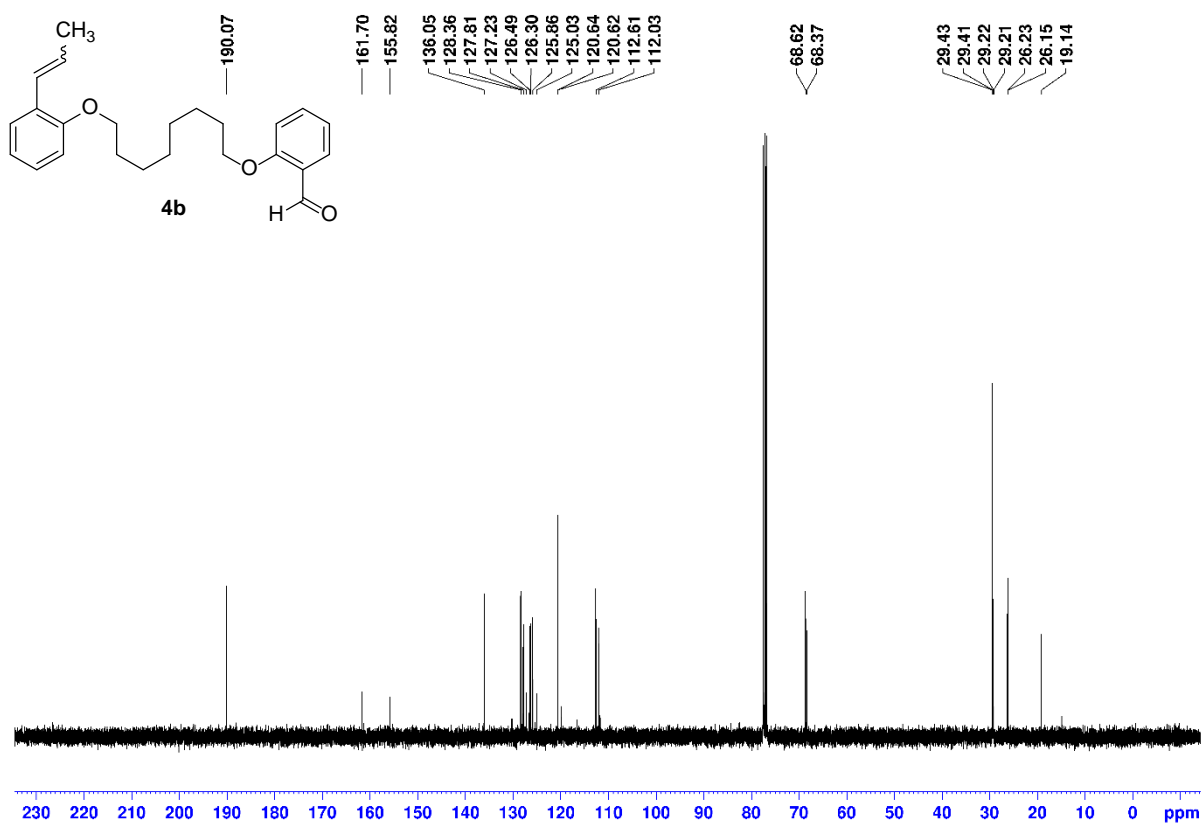

**<sup>1</sup>H NMR (400 MHz), CDCl<sub>3</sub>**

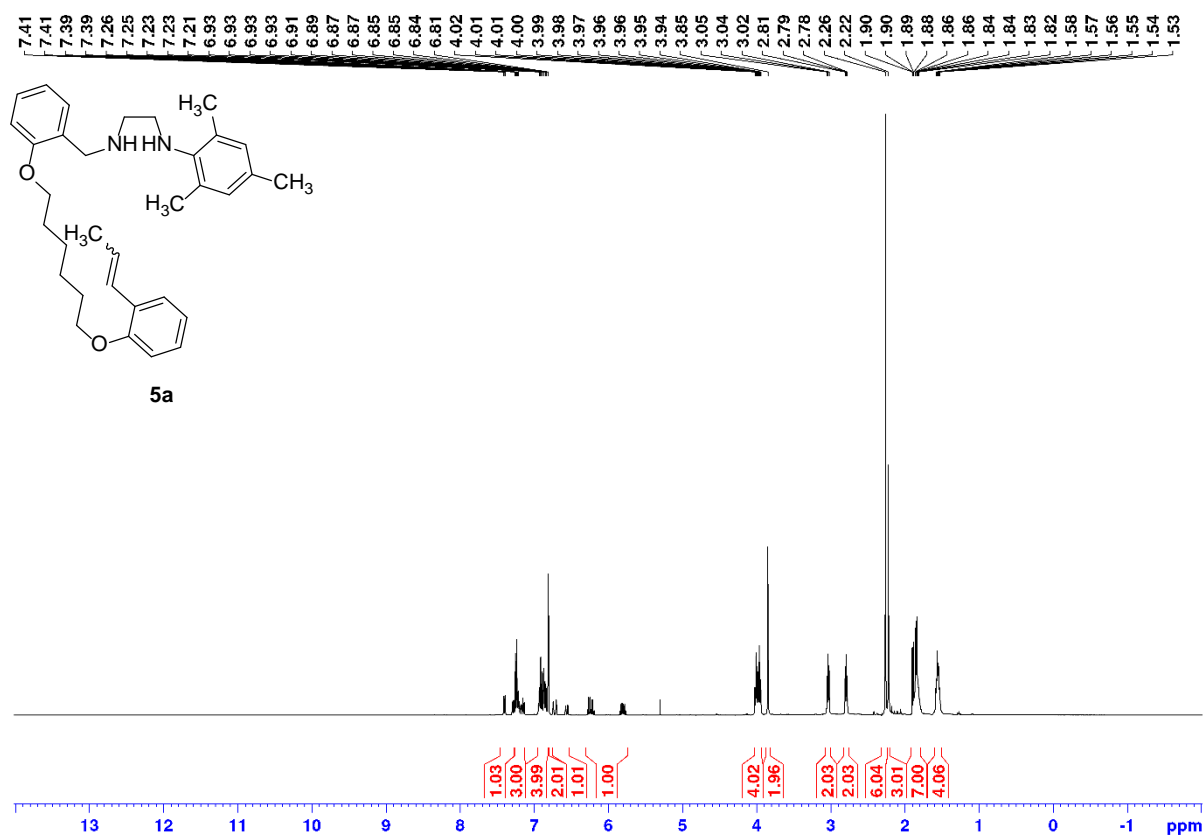

**<sup>13</sup>C NMR (101 MHz), CDCl<sub>3</sub>**

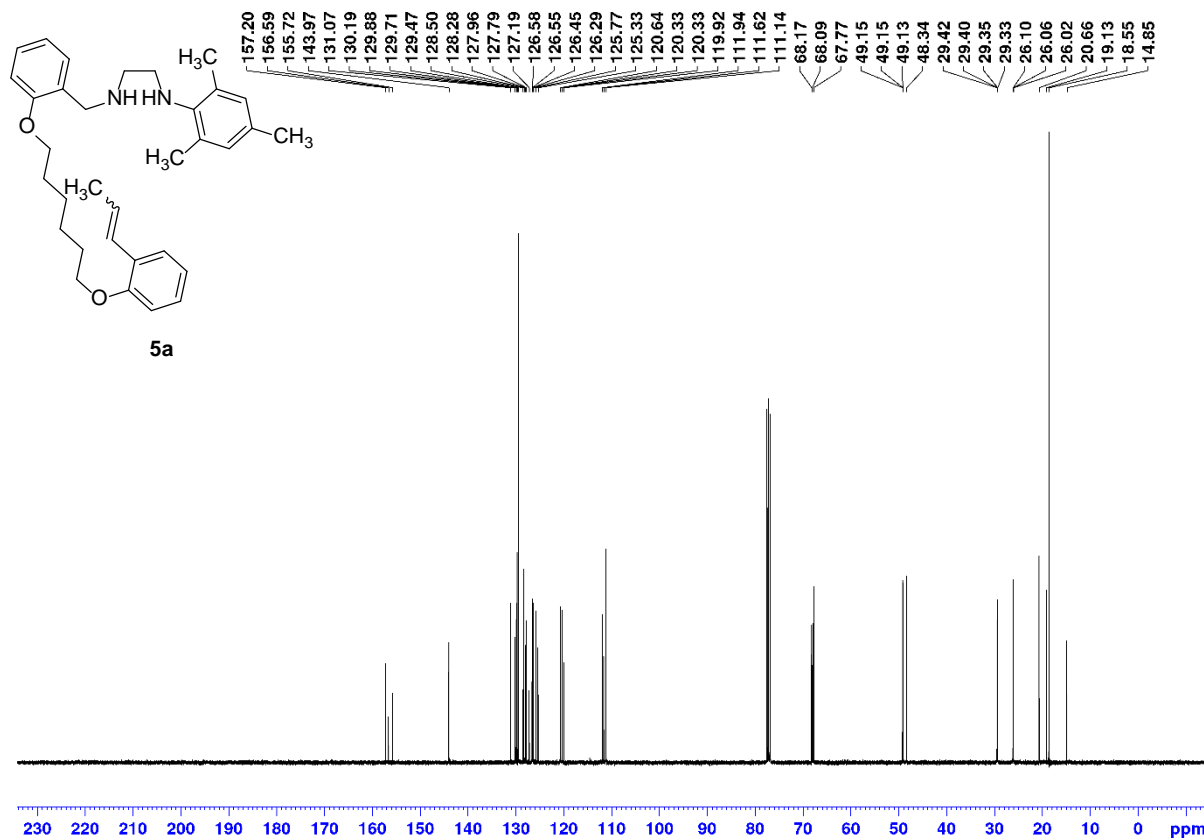

**<sup>1</sup>H NMR (400 MHz), CDCl<sub>3</sub>**

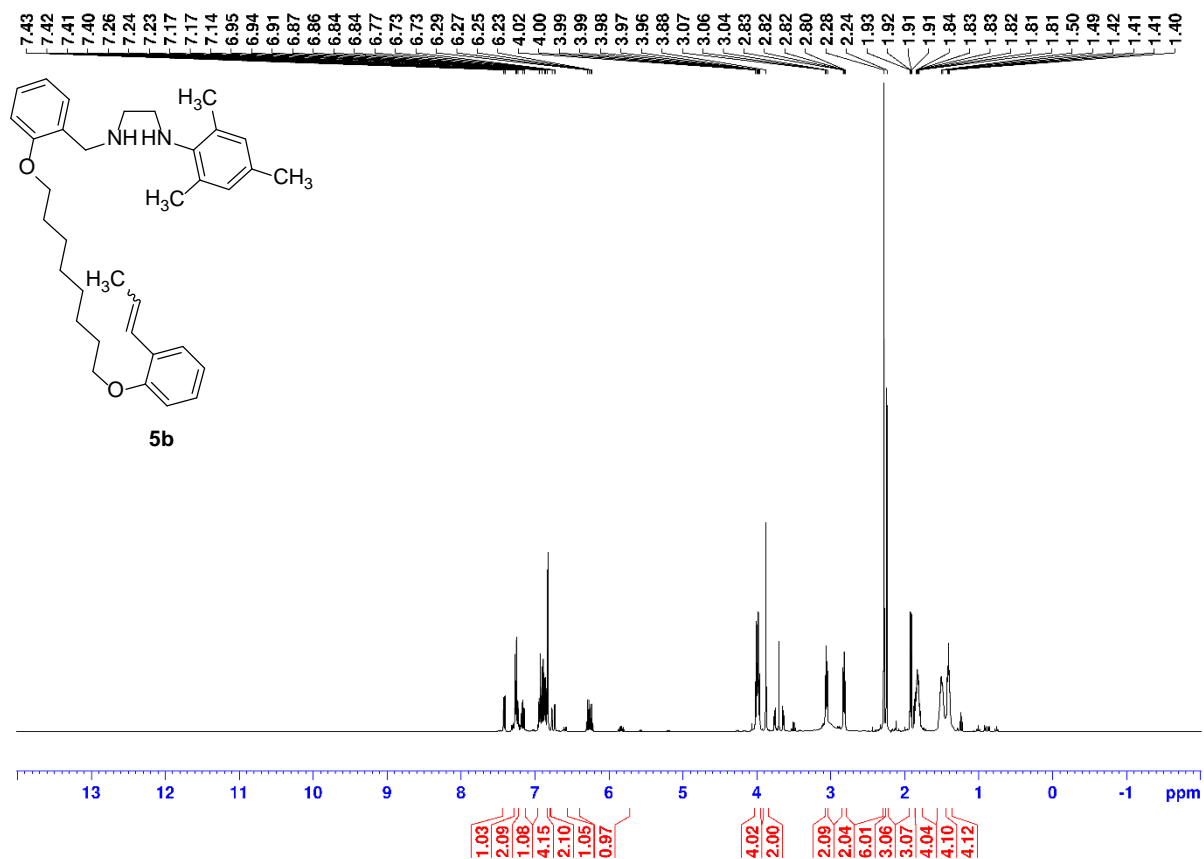

**<sup>13</sup>C NMR (101 MHz), CDCl<sub>3</sub>**

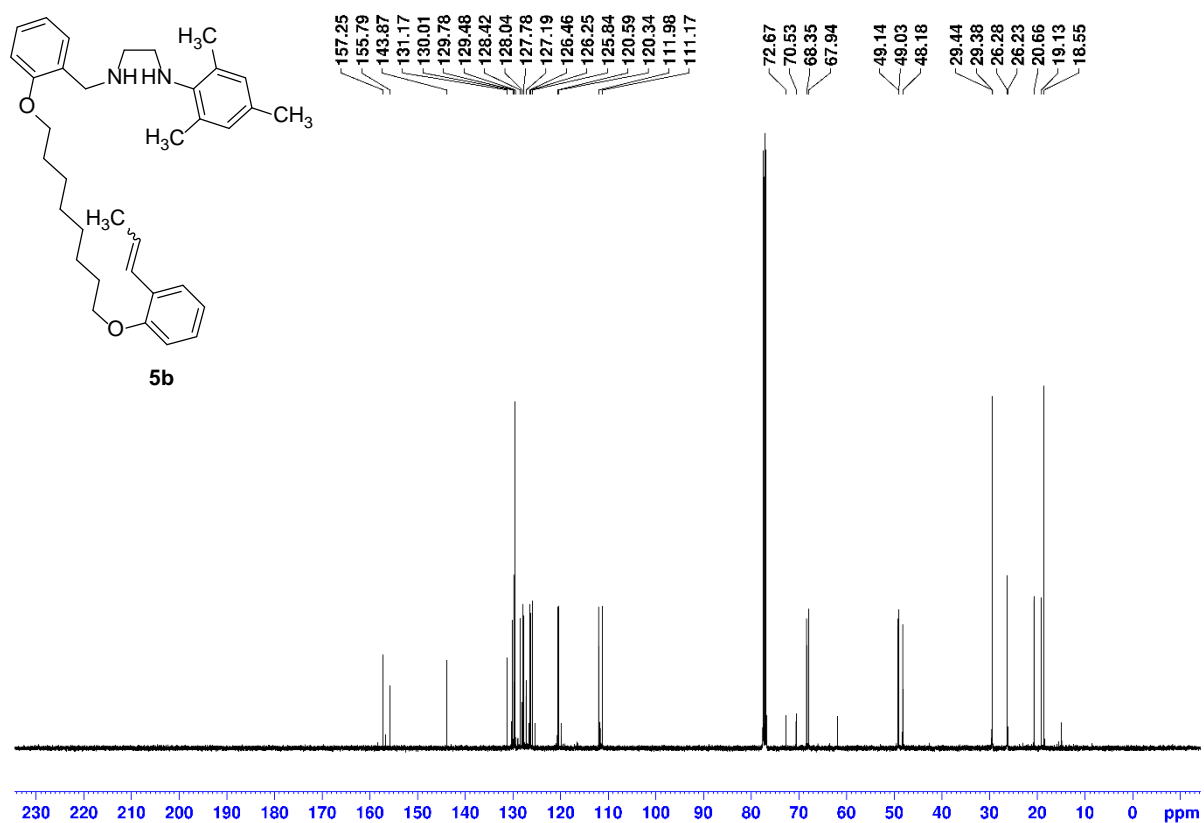

**6a**

<sup>1</sup>H NMR spectrum (CDCl<sub>3</sub>) of compound **6a**. The chemical structure of **6a** is shown, featuring a 2,4,6-trimethyl-1-(2-((E)-3-(benzyloxy)prop-1-en-1-yl)phenoxy)imidazolidinium cation with a BF<sub>4</sub><sup>-</sup> counterion. The spectrum displays peaks from 0 to 8 ppm. Integration values are provided below the baseline, and chemical shifts are listed above the peaks.

| Chemical Shift (ppm) | Integration |
|----------------------|-------------|
| 7.89                 | 1.00        |
| 7.42                 | 1.03        |
| 7.41                 | 2.04        |
| 7.39                 | 1.02        |
| 7.37                 | 1.04        |
| 7.26                 | 4.05        |
| 7.01                 | 1.01        |
| 6.99                 | 1.01        |
| 6.97                 | 0.98        |
| 6.94                 | 1.99        |
| 6.92                 | 4.00        |
| 6.90                 | 2.03        |
| 6.88                 | 2.00        |
| 6.86                 | 2.99        |
| 6.83                 | 6.00        |
| 6.83                 | 7.04        |
| 6.81                 | 4.02        |
| 6.81                 |             |
| 4.12                 |             |
| 4.11                 |             |
| 4.10                 |             |
| 4.09                 |             |
| 4.08                 |             |
| 4.05                 |             |
| 4.04                 |             |
| 4.04                 |             |
| 4.03                 |             |
| 4.02                 |             |
| 4.01                 |             |
| 3.97                 |             |
| 3.96                 |             |
| 3.95                 |             |
| 3.95                 |             |
| 3.94                 |             |
| 3.93                 |             |
| 2.25                 |             |
| 2.23                 |             |
| 1.88                 |             |
| 1.88                 |             |
| 1.86                 |             |
| 1.86                 |             |
| 1.84                 |             |
| 1.84                 |             |
| 1.83                 |             |
| 1.82                 |             |
| 1.80                 |             |
| 1.79                 |             |
| 1.77                 |             |
| 1.60                 |             |
| 1.53                 |             |
| 1.52                 |             |
| 1.51                 |             |
| 1.51                 |             |
| 1.50                 |             |
| 1.49                 |             |

**6a**

$\text{BF}_4^-$

157.94, 157.37, 156.55, 155.67, 140.38, 135.53, 135.52, 131.94, 131.92, 131.16, 130.60, 130.14, 130.00, 128.04, 127.89, 127.04, 126.54, 126.42, 126.39, 126.21, 125.74, 125.30, 121.34, 120.66, 120.63, 119.94, 111.99, 111.83, 111.67, 68.49, 68.07, 66.00, 51.03, 48.59, 48.22, 29.21, 29.20, 29.16, 25.95, 25.91, 25.82, 21.08, 21.07, 19.12, 17.51, 14.84

Chemical structure of **6a** is shown, which is a complex molecule featuring a benzimidazole core, a phenyl ring, and a BF<sub>4</sub><sup>-</sup> counterion. The structure is labeled **6a**.

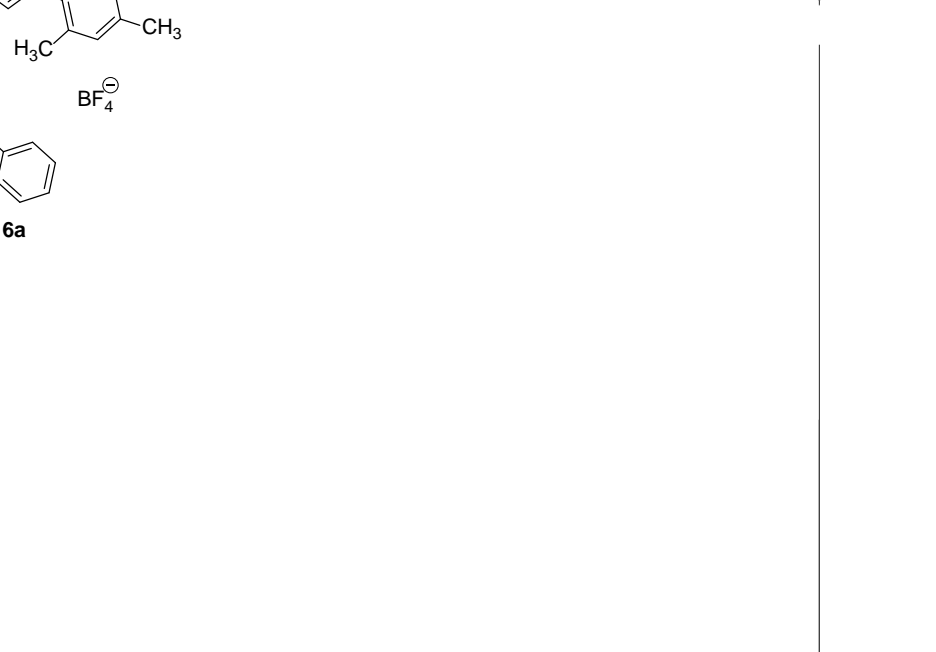

The <sup>15</sup>N NMR spectrum shows a single peak at approximately -152.5 ppm, corresponding to the imidazole nitrogen atom in the structure of **6a**.

[illegible]

**6b**

<sup>13</sup>C NMR spectrum (DMSO-d<sub>6</sub>) of compound **6b**. The chemical structure of **6b** is shown above the spectrum. The spectrum displays peaks corresponding to the structure, with the following chemical shifts (ppm) labeled above the peaks:

| Chemical Shift (ppm) |
|----------------------|
| 157.94               |
| 157.44               |
| 155.80               |
| 140.51               |
| 135.62               |
| 132.07               |
| 131.22               |
| 130.62               |
| 130.08               |
| 127.86               |
| 127.17               |
| 126.47               |
| 126.23               |
| 125.87               |
| 121.42               |
| 120.69               |
| 120.66               |
| 112.06               |
| 111.89               |
| 68.68                |
| 68.34                |
| 51.07                |
| 48.67                |
| 48.43                |
| 29.38                |
| 29.35                |
| 29.32                |
| 26.19                |
| 26.11                |
| 21.12                |
| 19.14                |
| 17.57                |

Chemical structure of **6b** is shown, which is a complex molecule featuring a benzimidazole core, a phenyl group, and a long alkyl chain with a terminal phenyl ring. The structure is labeled **6b**.

The <sup>13</sup>C NMR spectrum of **6b** is displayed, showing a single sharp peak at -152.22 ppm, corresponding to the carbonyl carbon of the amide group.

**$^1\text{H}$  NMR (400 MHz),  $\text{CD}_2\text{Cl}_2$**

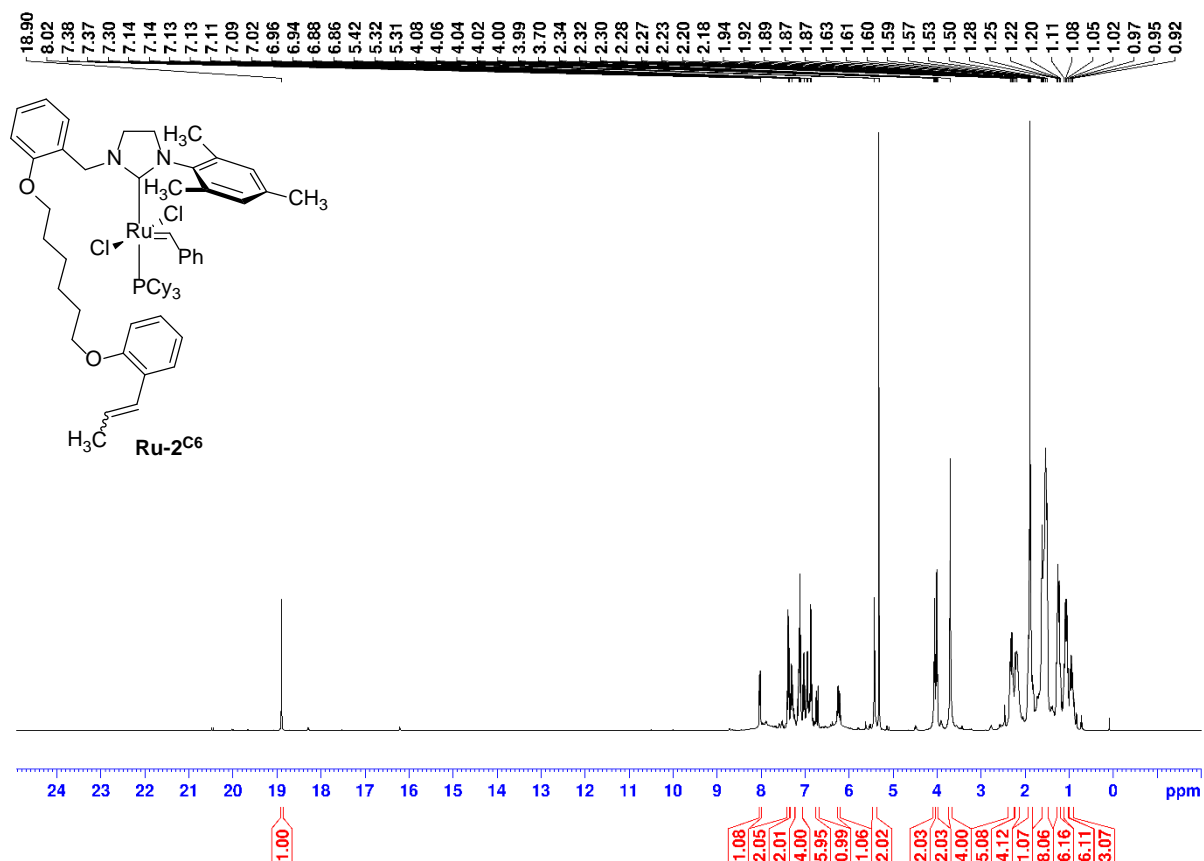

**$^{13}\text{C}$  NMR (101 MHz),  $\text{CD}_2\text{Cl}_2$**

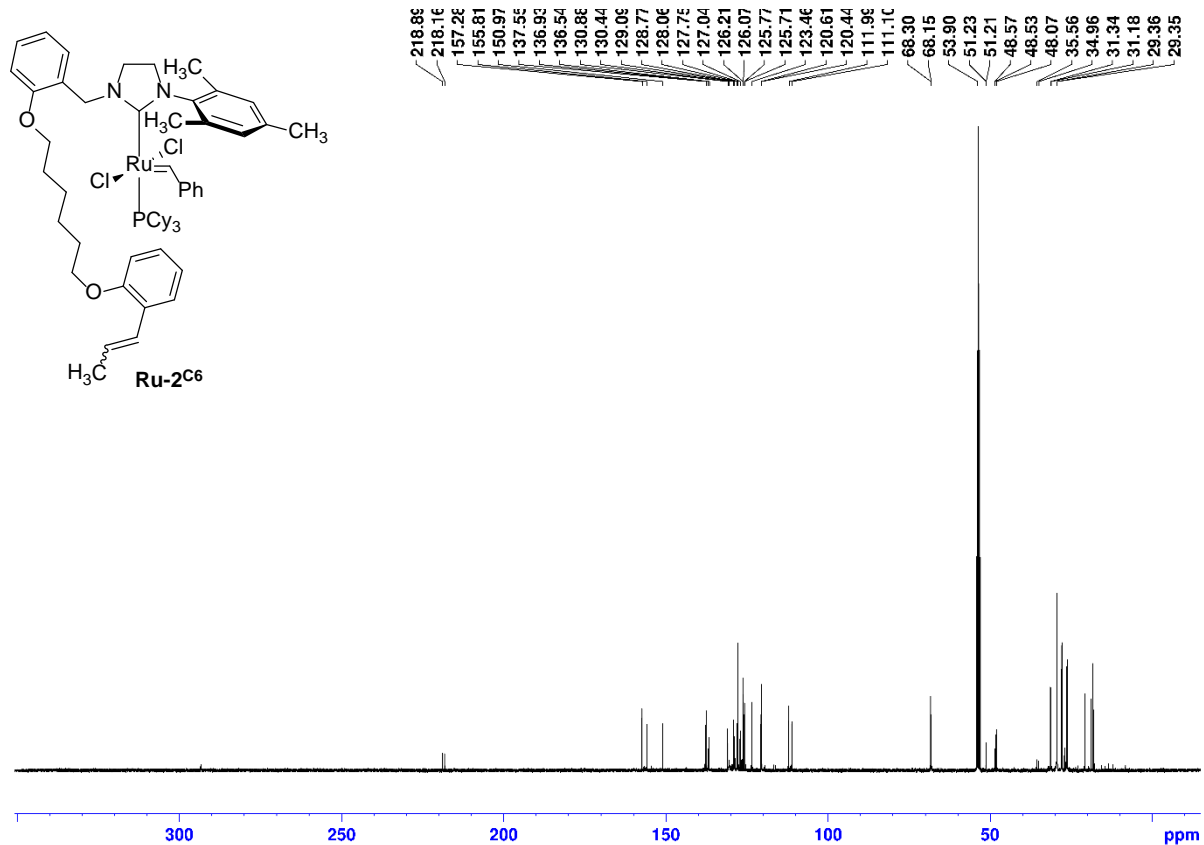

$^{31}\text{P}$  NMR (162 MHz),  $\text{CD}_2\text{Cl}_2$

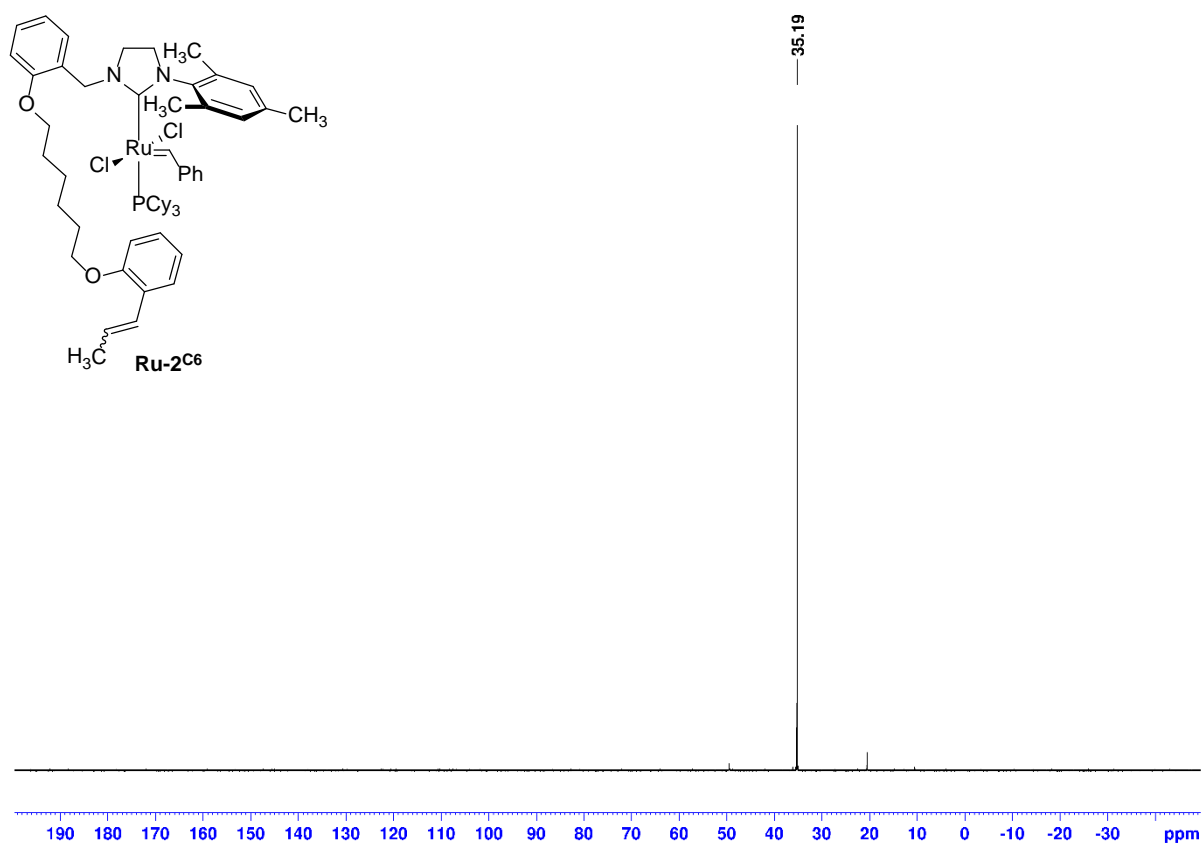

$^1\text{H}$  NMR (400 MHz),  $\text{CD}_2\text{Cl}_2$

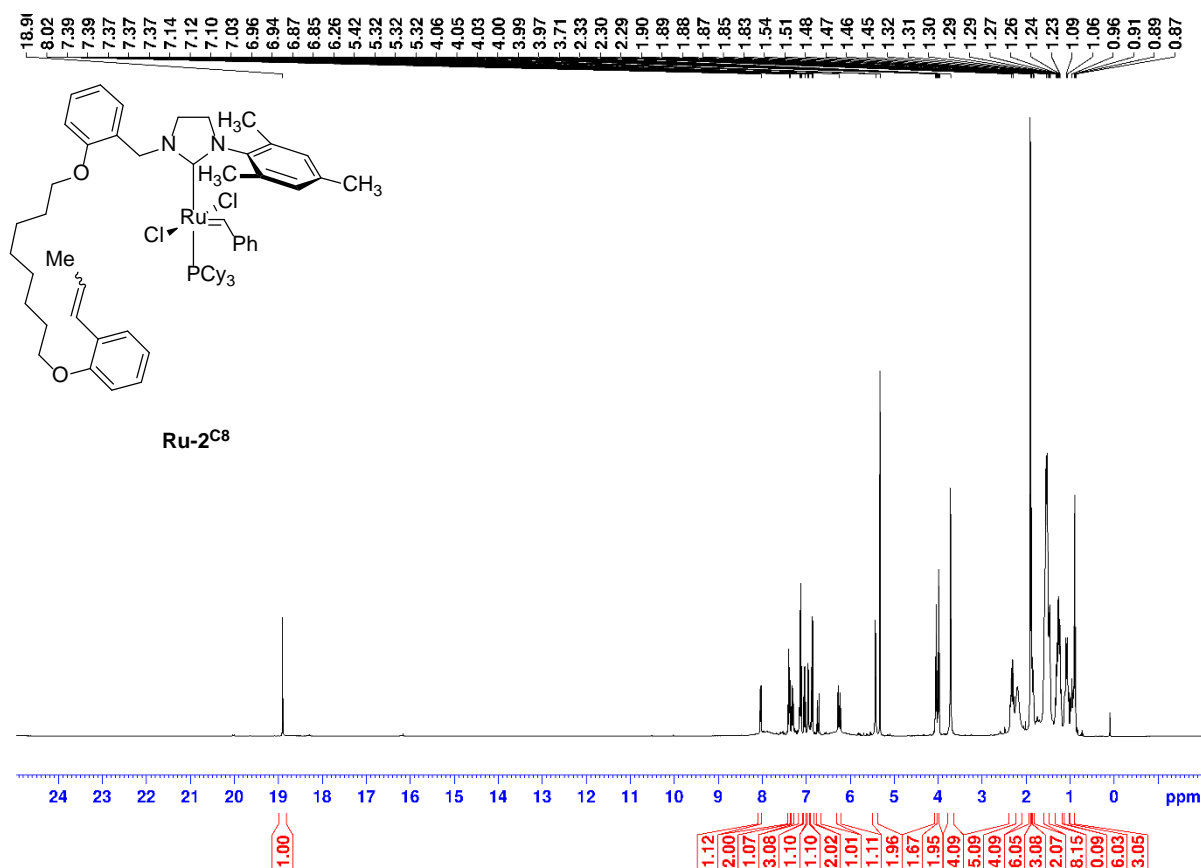

**$^{13}\text{C}$  NMR (101 MHz),  $\text{CD}_2\text{Cl}_2$**

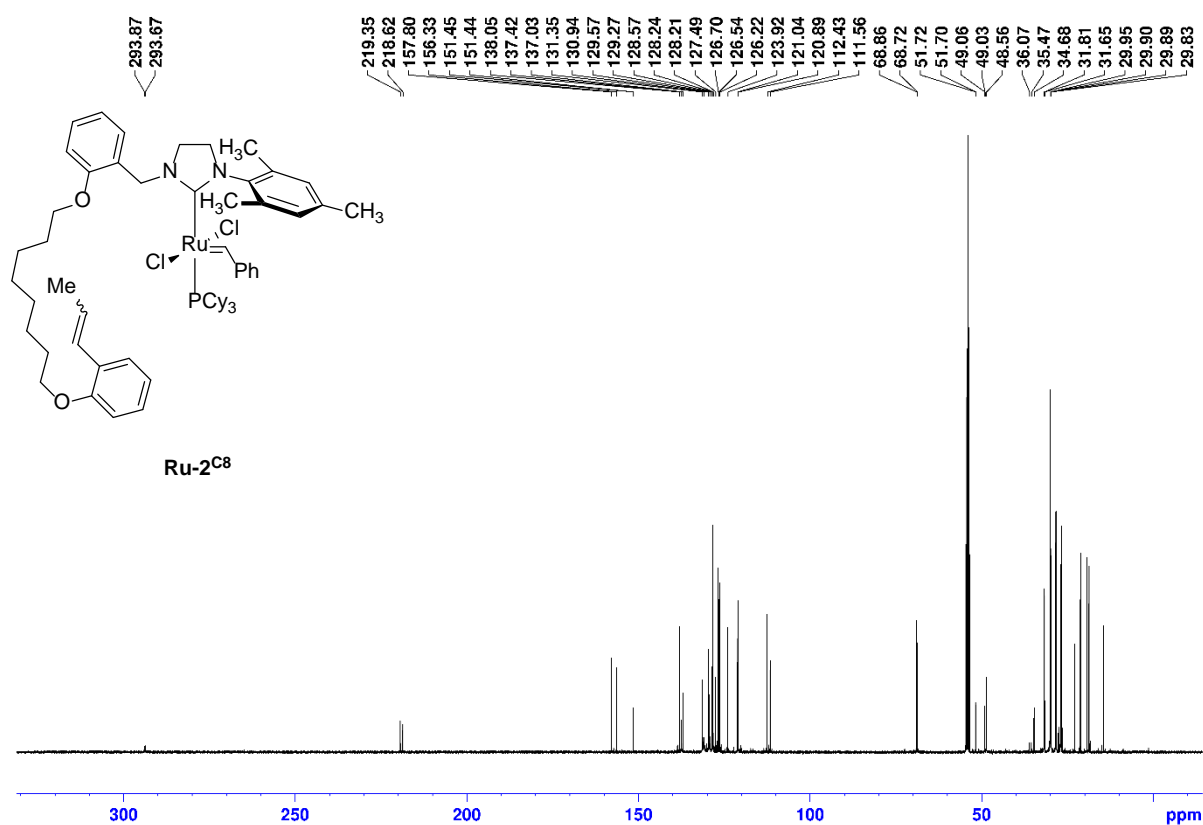

**$^{31}\text{P}$  NMR (162 MHz),  $\text{CD}_2\text{Cl}_2$**

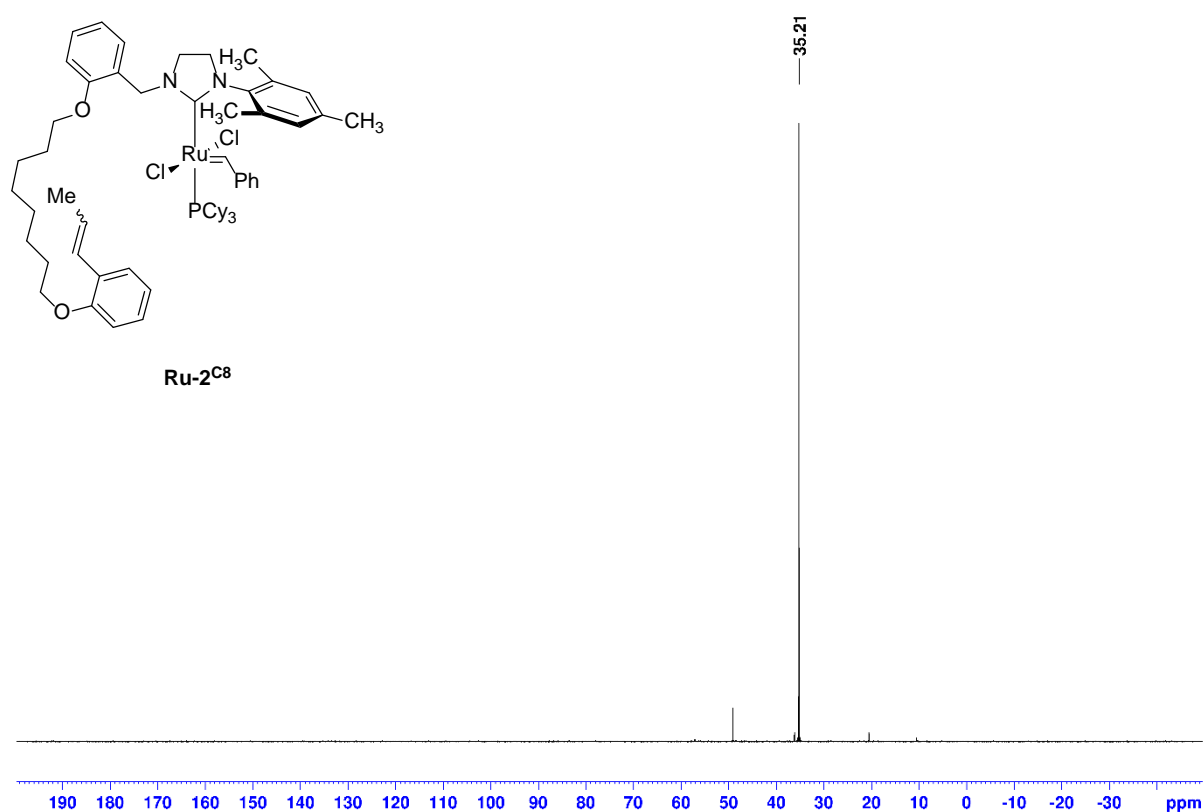

**$^1\text{H}$  NMR (400 MHz),  $\text{CD}_2\text{Cl}_2$**

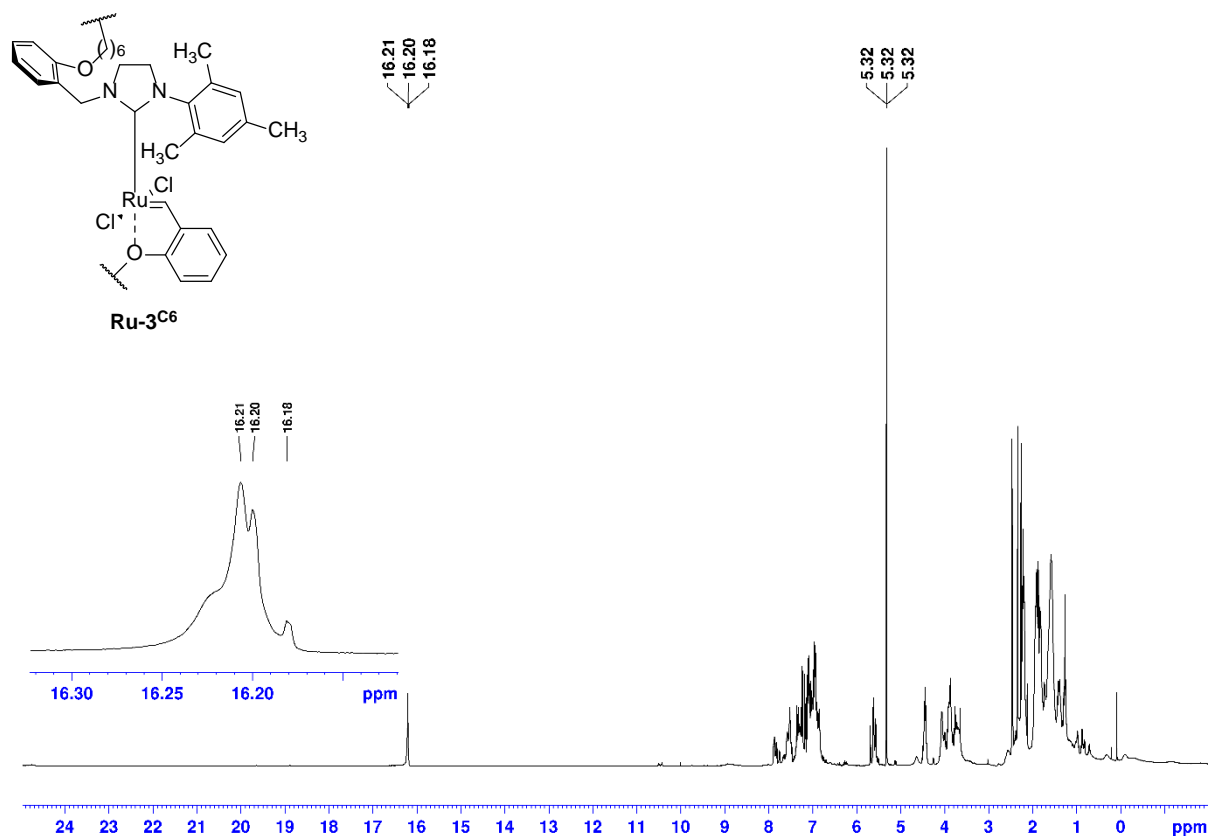

**HSQC NMR (400 MHz),  $\text{CD}_2\text{Cl}_2$**

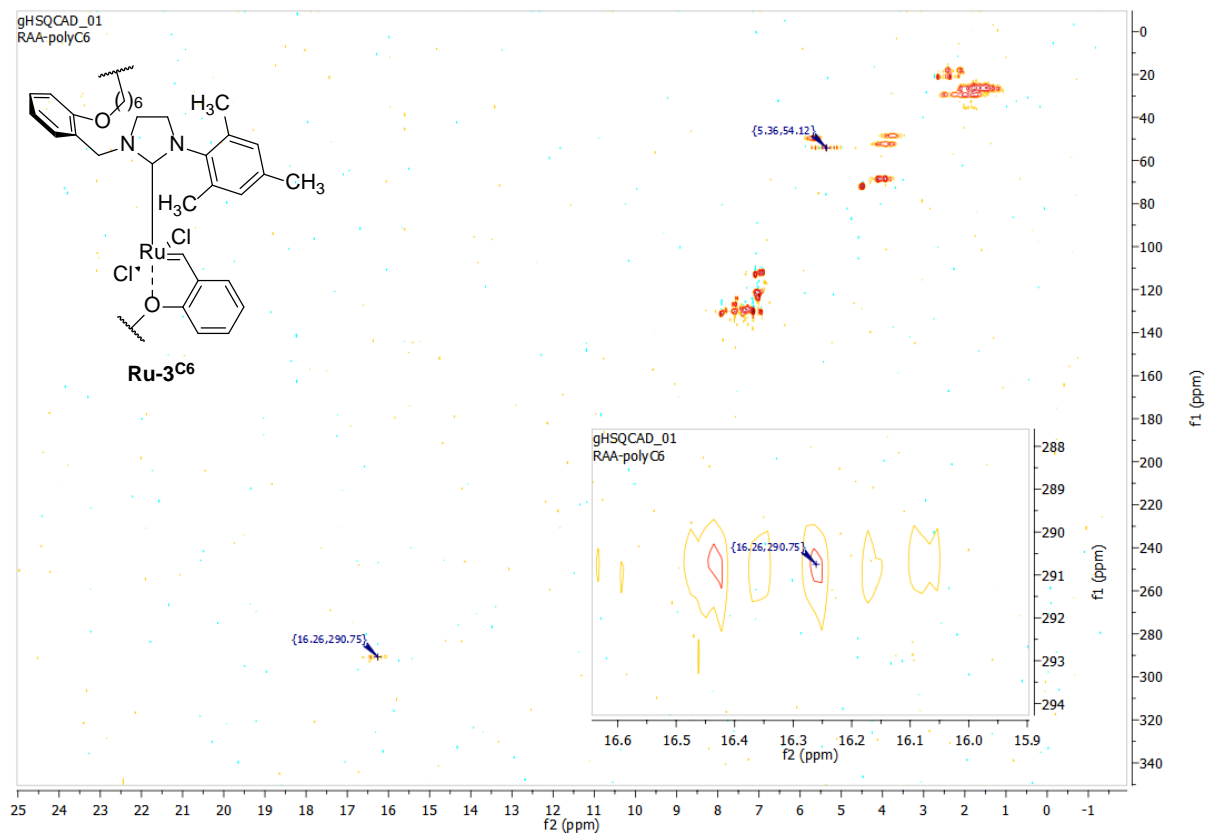

$^{31}\text{P}$  NMR (162 MHz),  $\text{CD}_2\text{Cl}_2$

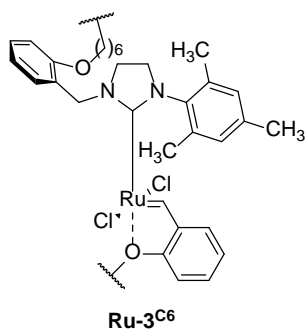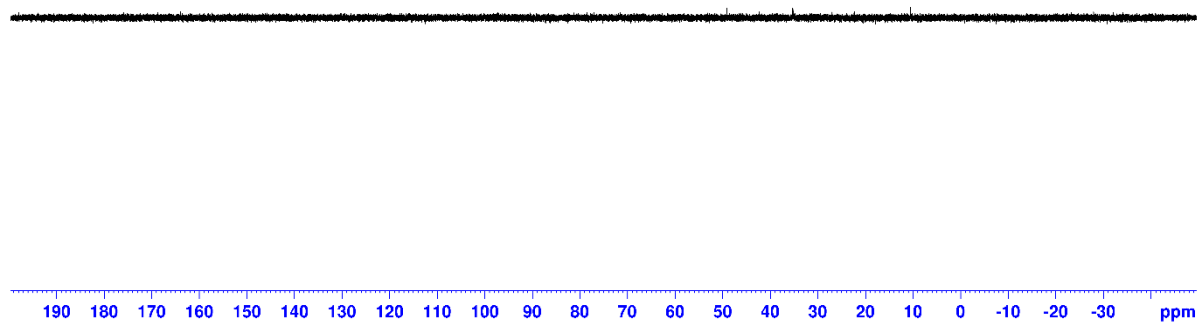

$^1\text{H}$  NMR (400 MHz),  $\text{CD}_2\text{Cl}_2$

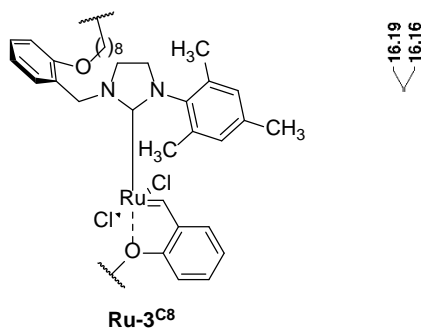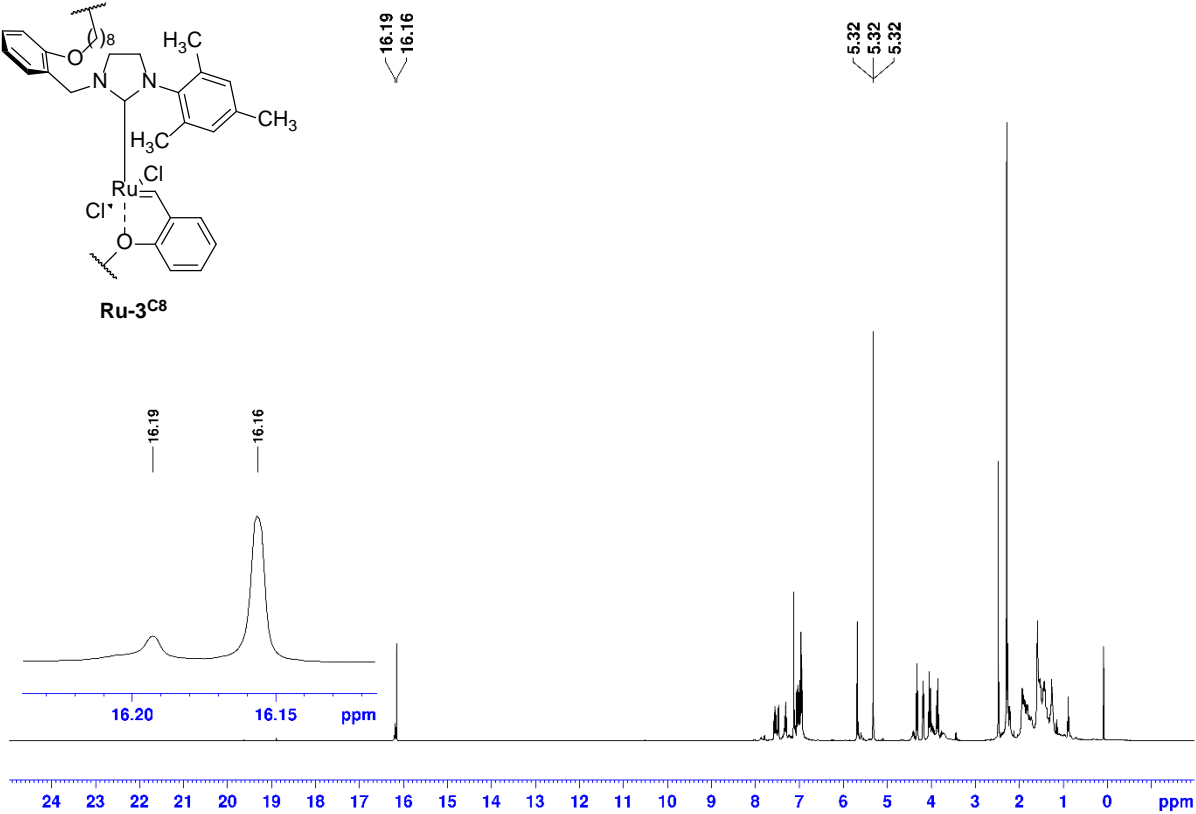

## HSQC NMR (400 MHz), CD<sub>2</sub>Cl<sub>2</sub>

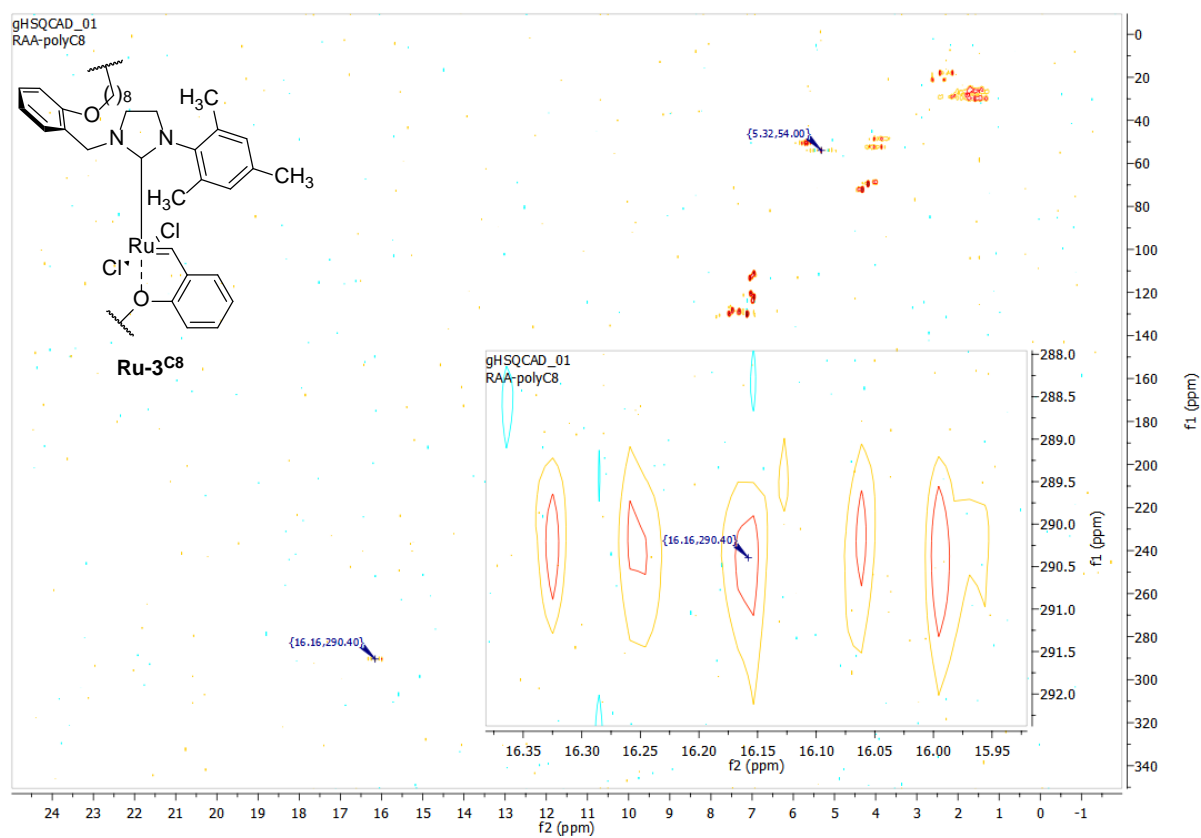

## <sup>31</sup>P NMR (162 MHz), CD<sub>2</sub>Cl<sub>2</sub>

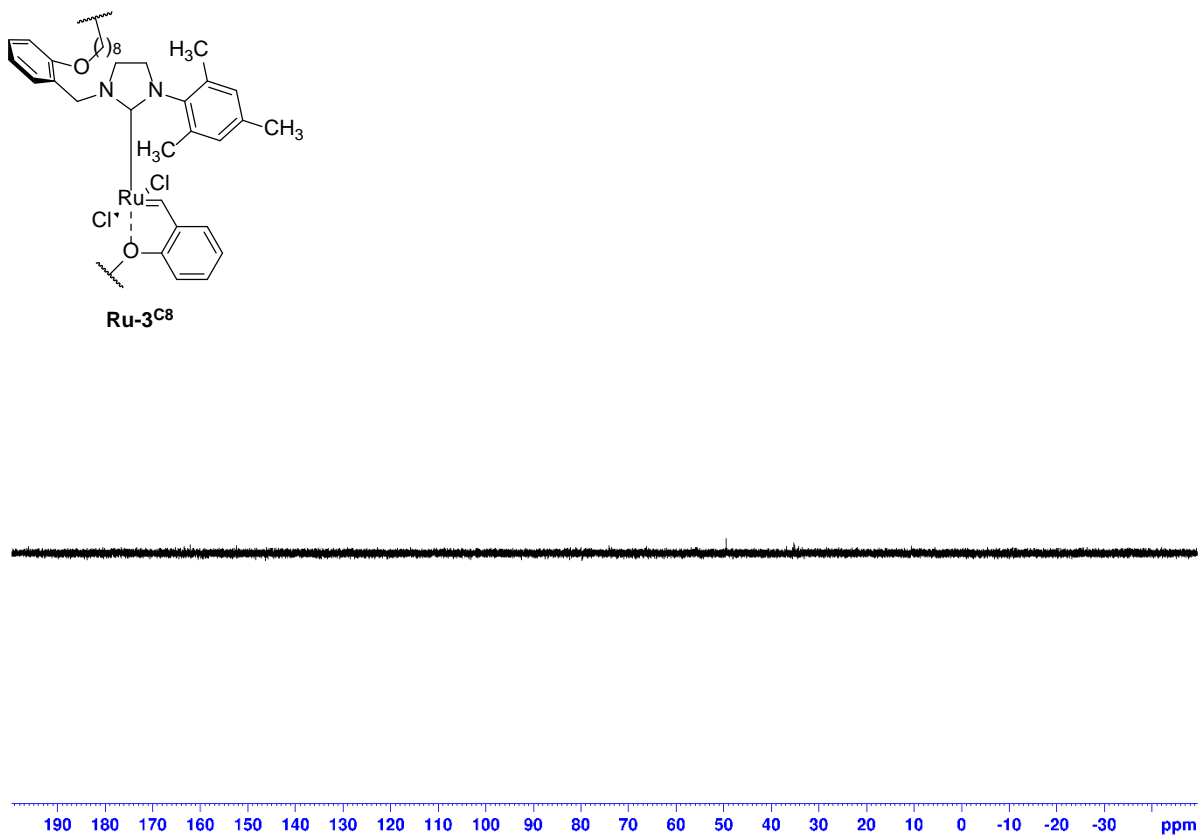

**<sup>1</sup>H NMR (400 MHz), CDCl<sub>3</sub>**

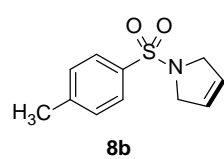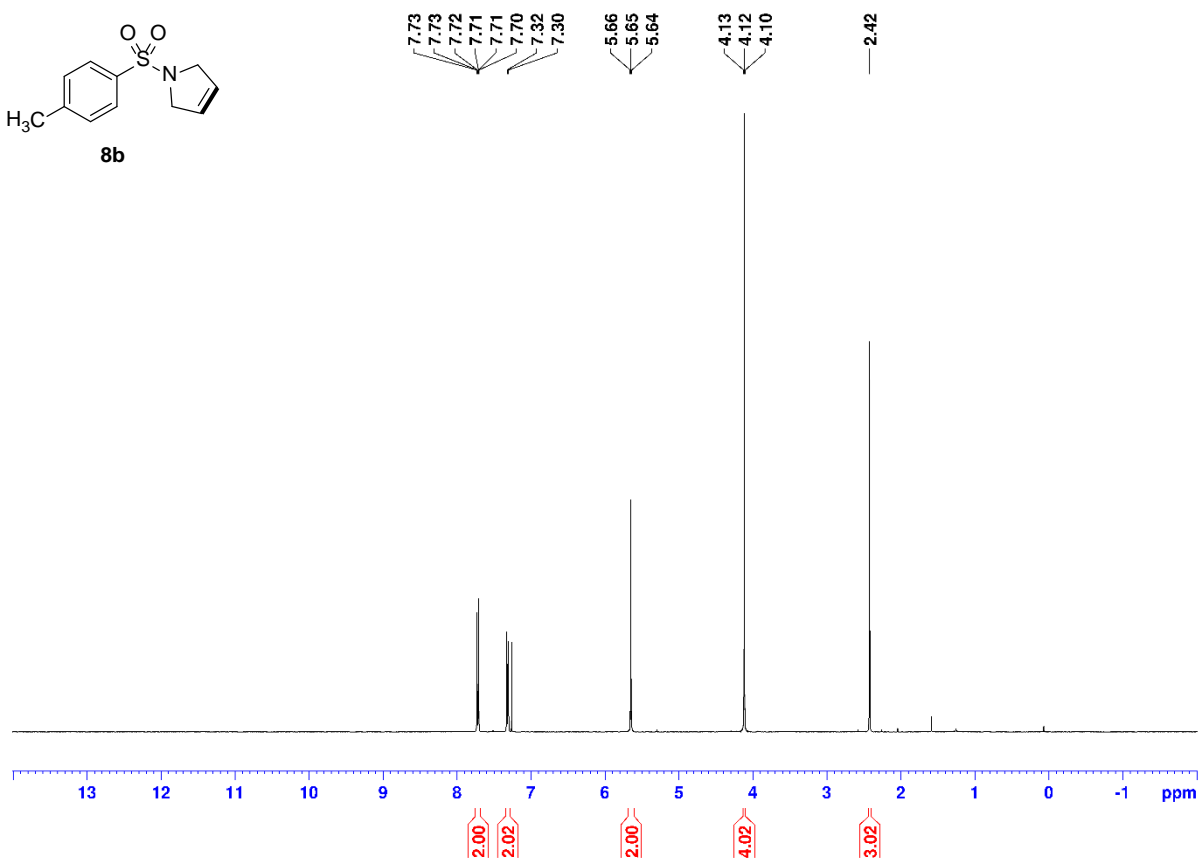

**<sup>13</sup>C NMR (101 MHz), CDCl<sub>3</sub>**

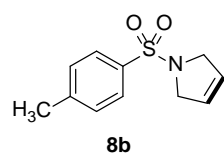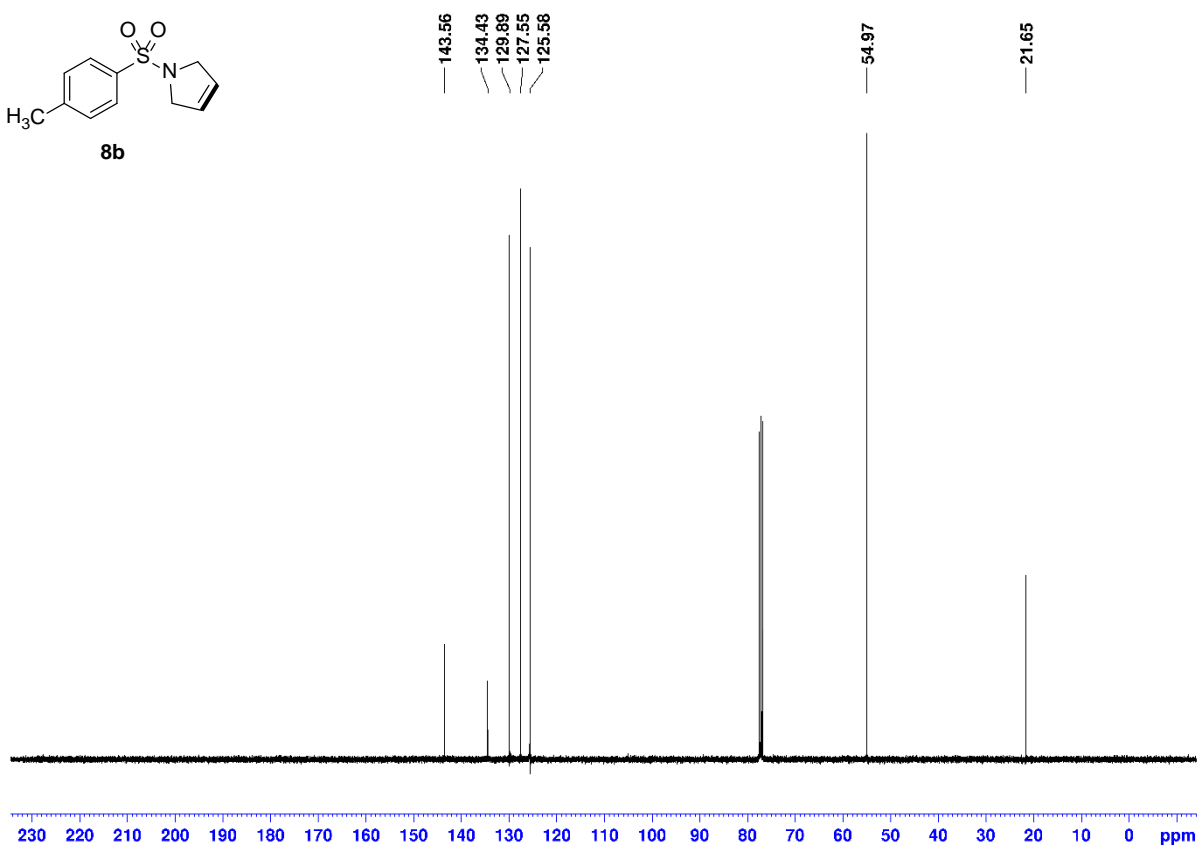

**<sup>1</sup>H NMR (400 MHz), CDCl<sub>3</sub>**

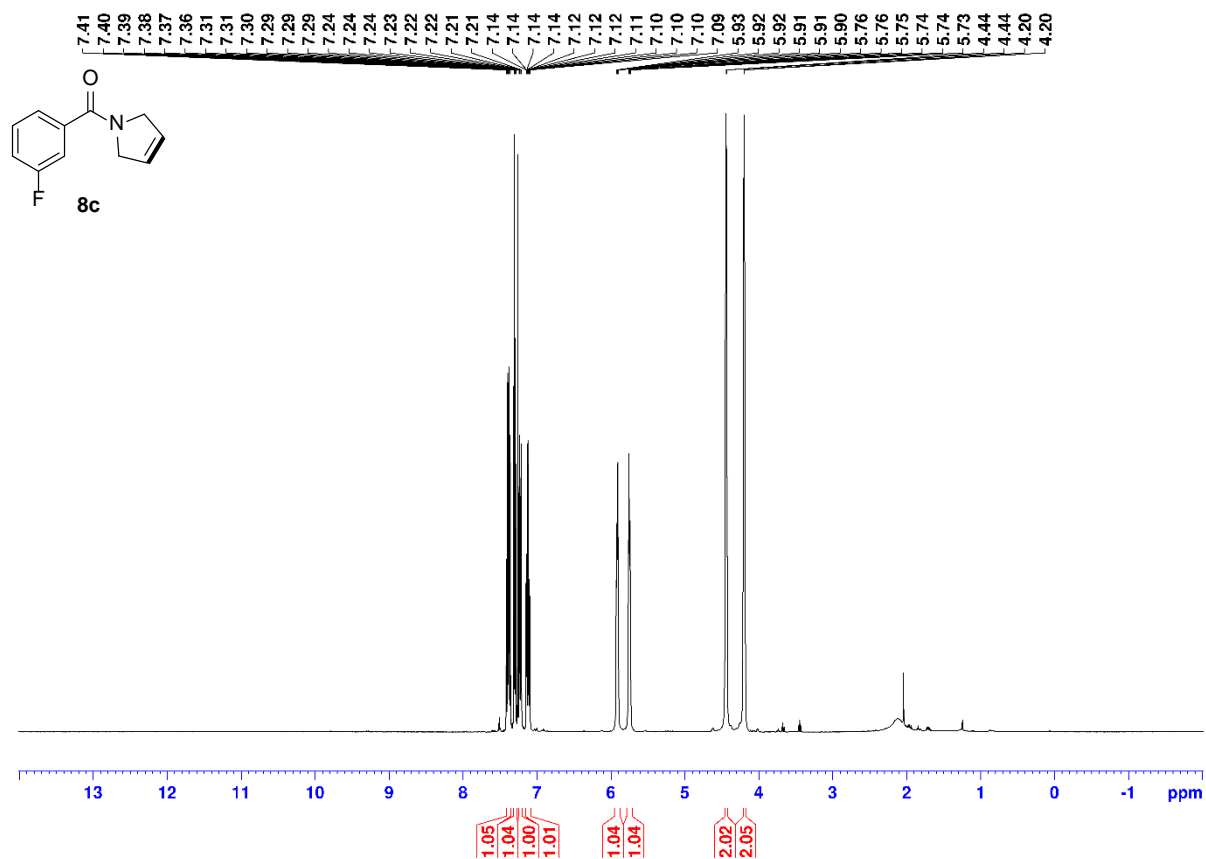

**<sup>13</sup>C NMR (101 MHz), CDCl<sub>3</sub>**

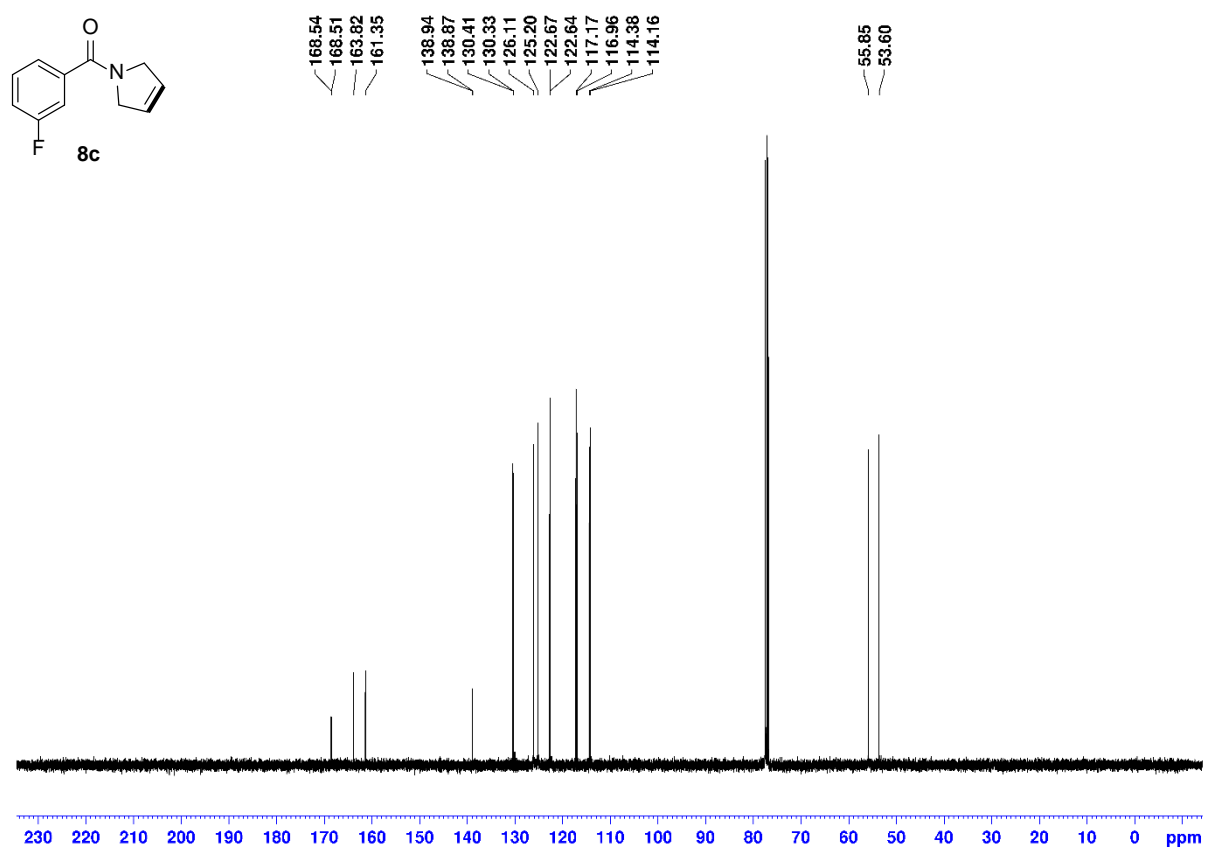

$^{19}\text{F}$  NMR (376 MHz),  $\text{CDCl}_3$

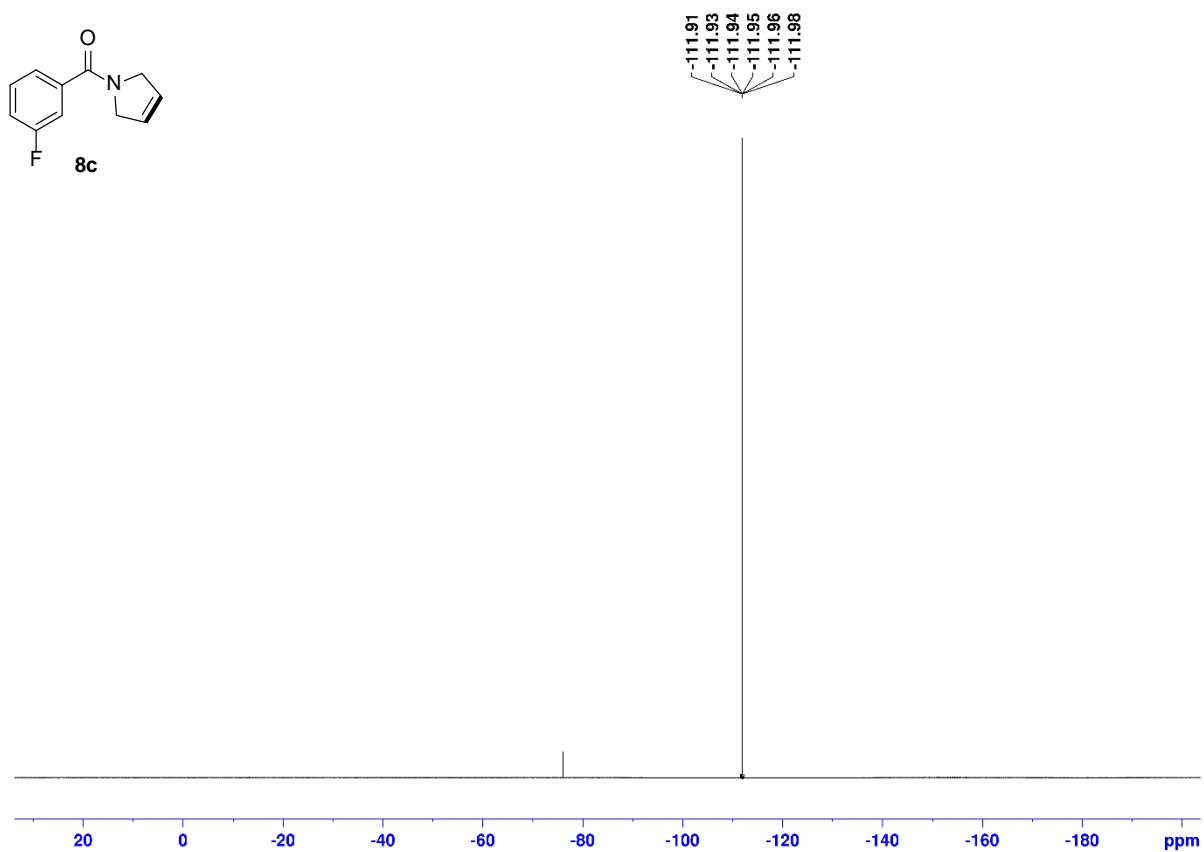

$^1\text{H}$  NMR (400 MHz),  $\text{CDCl}_3$

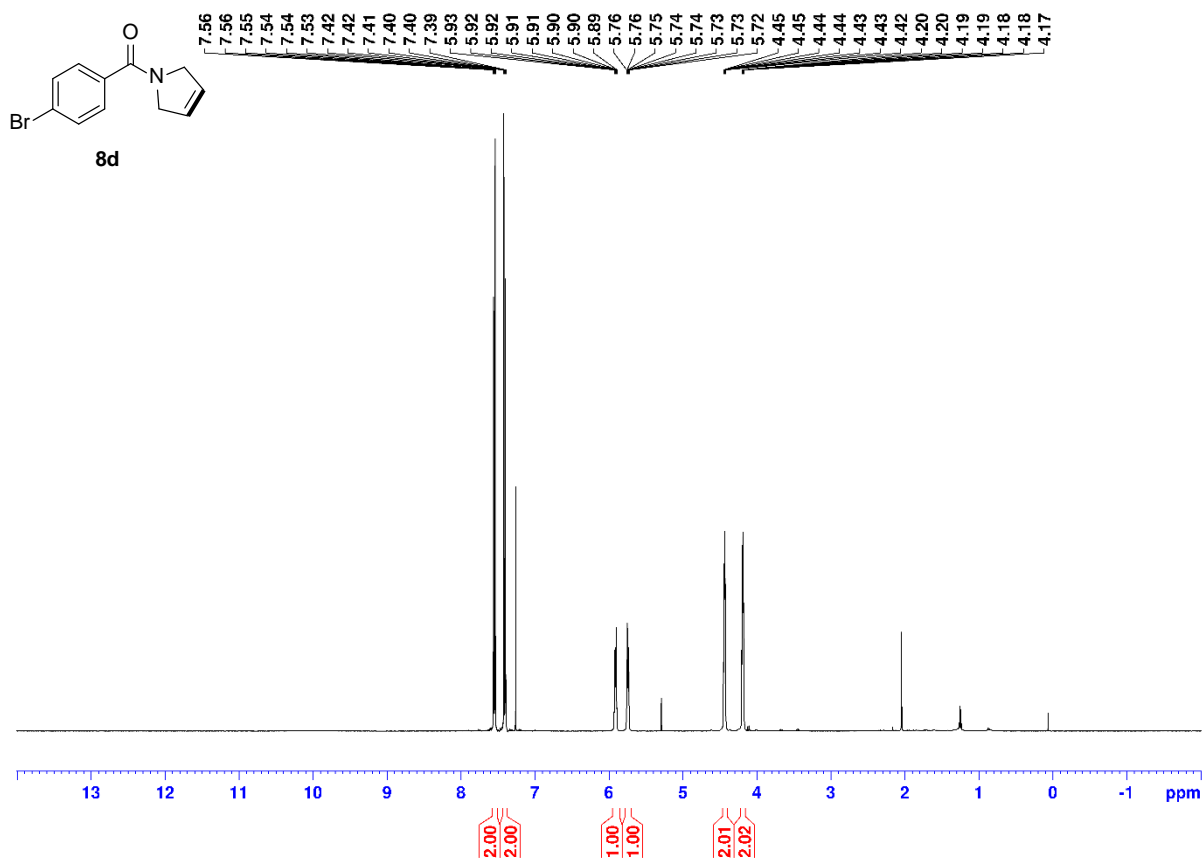

$^{13}\text{C}$  NMR (101 MHz),  $\text{CDCl}_3$

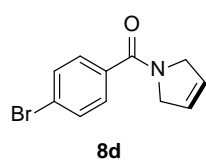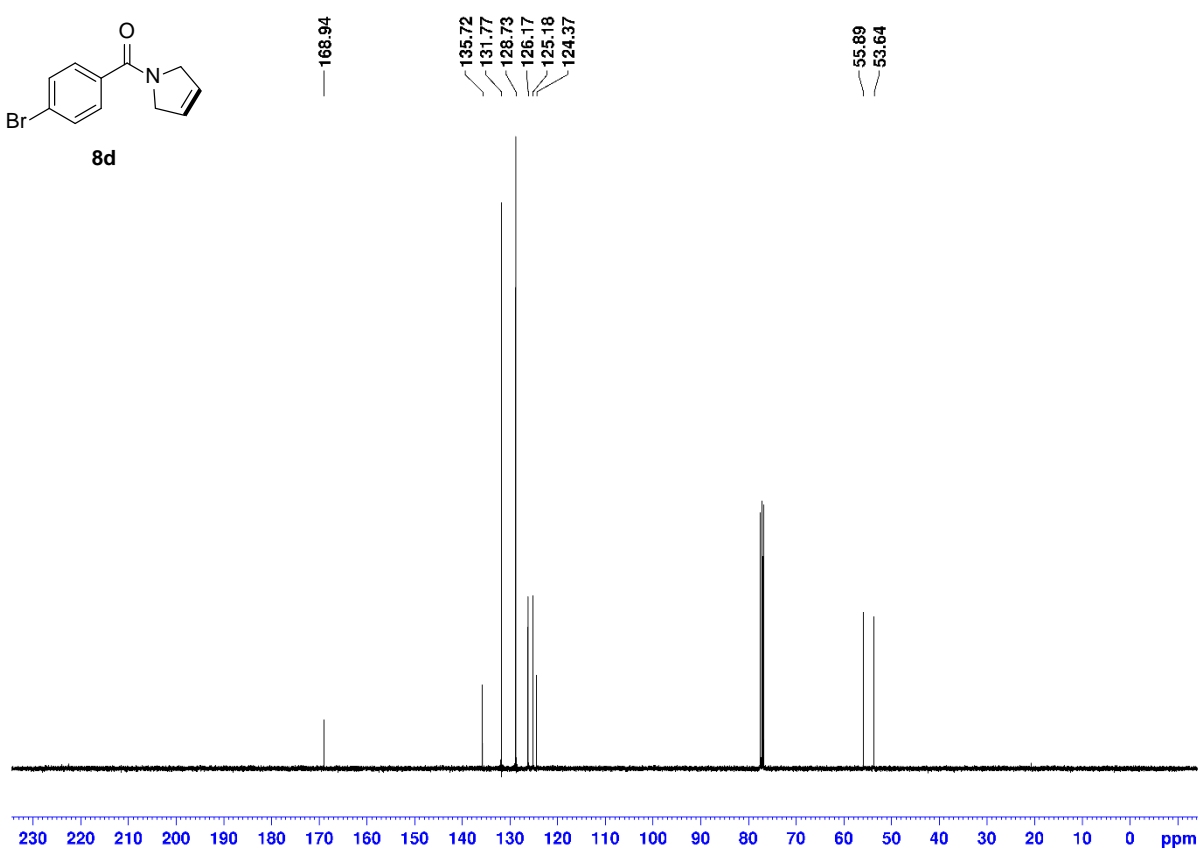

$^1\text{H}$  NMR (400 MHz),  $\text{CDCl}_3$

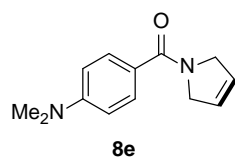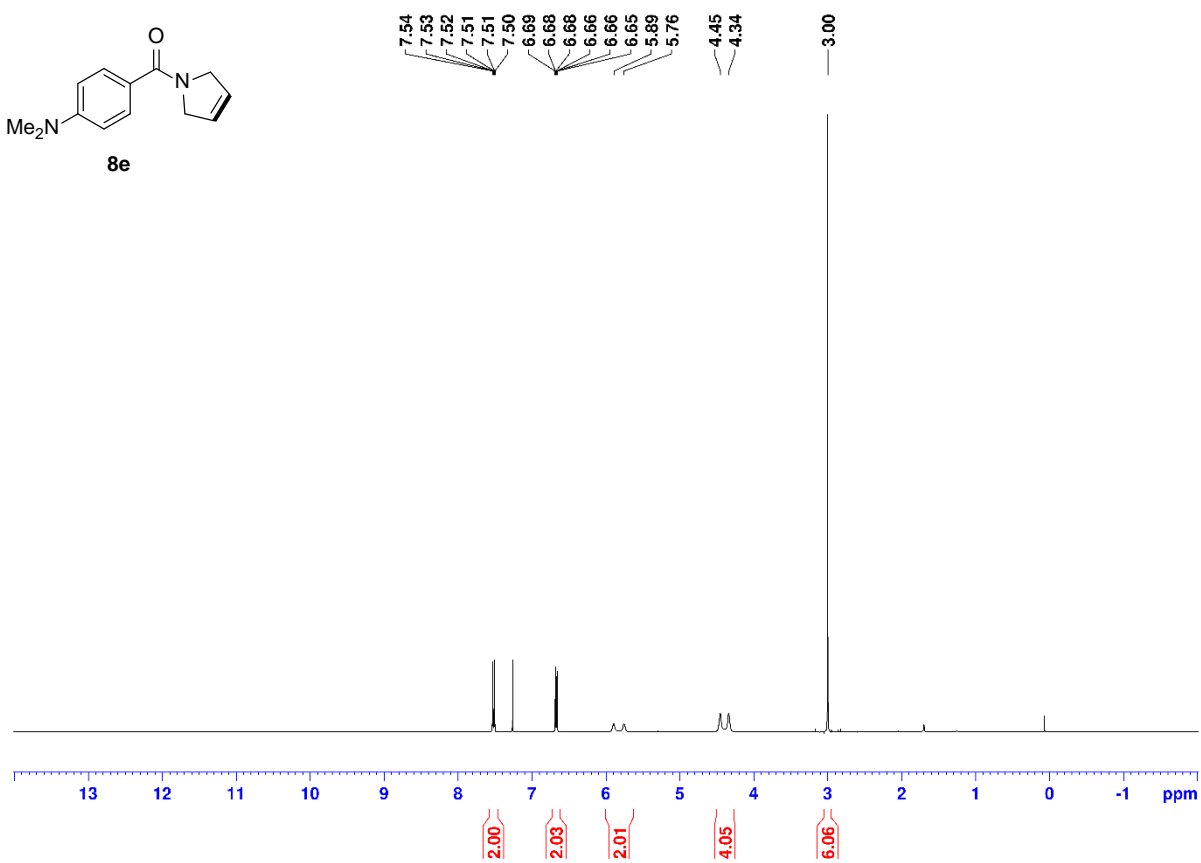

$^{13}\text{C}$  NMR (101 MHz),  $\text{CDCl}_3$

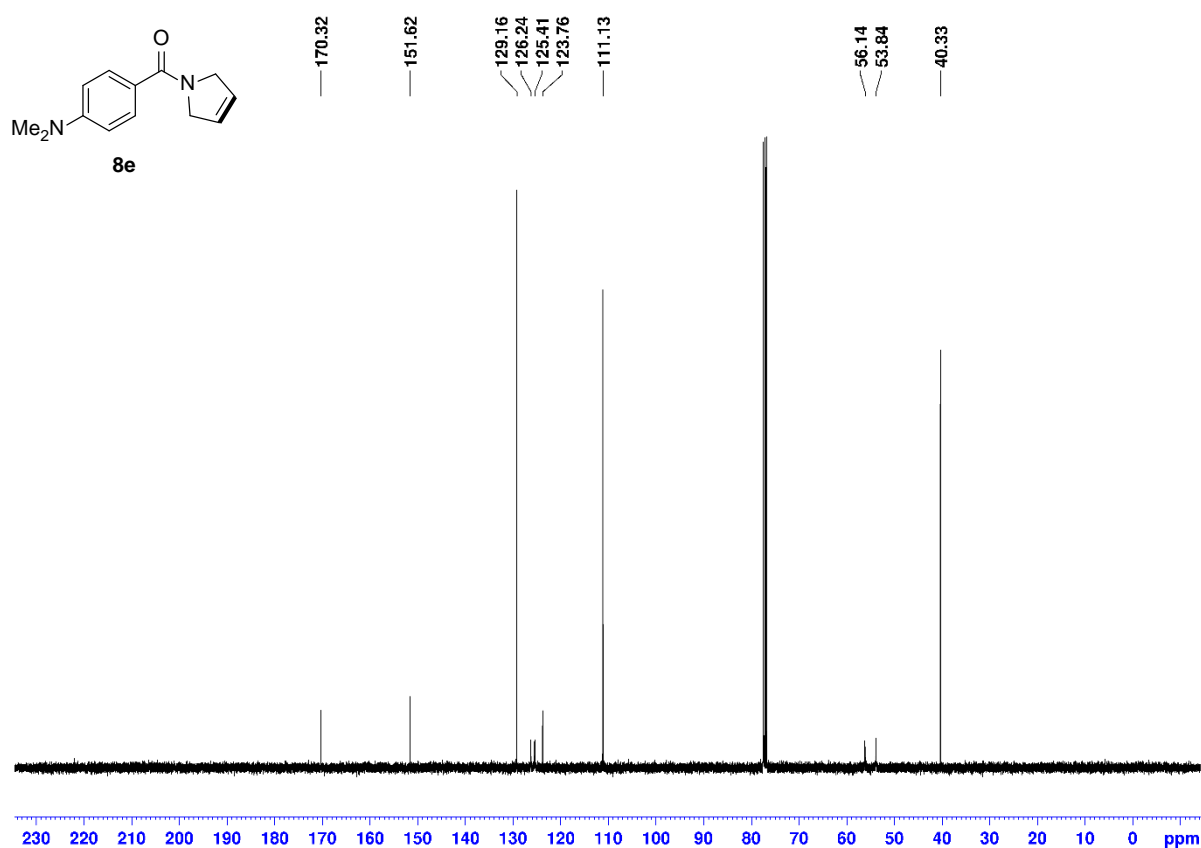

$^1\text{H}$  NMR (400 MHz),  $\text{CDCl}_3$

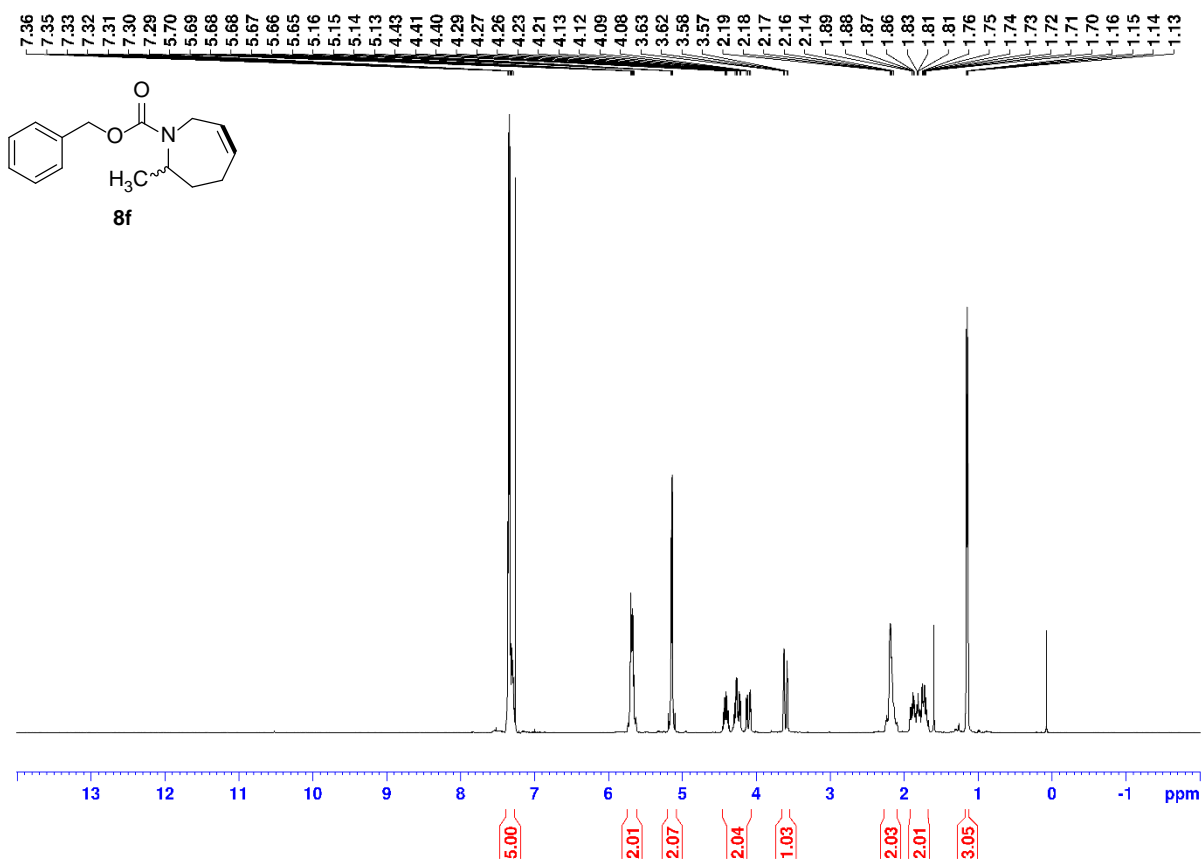

$^{13}\text{C}$  NMR (101 MHz),  $\text{CDCl}_3$

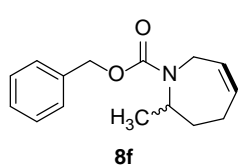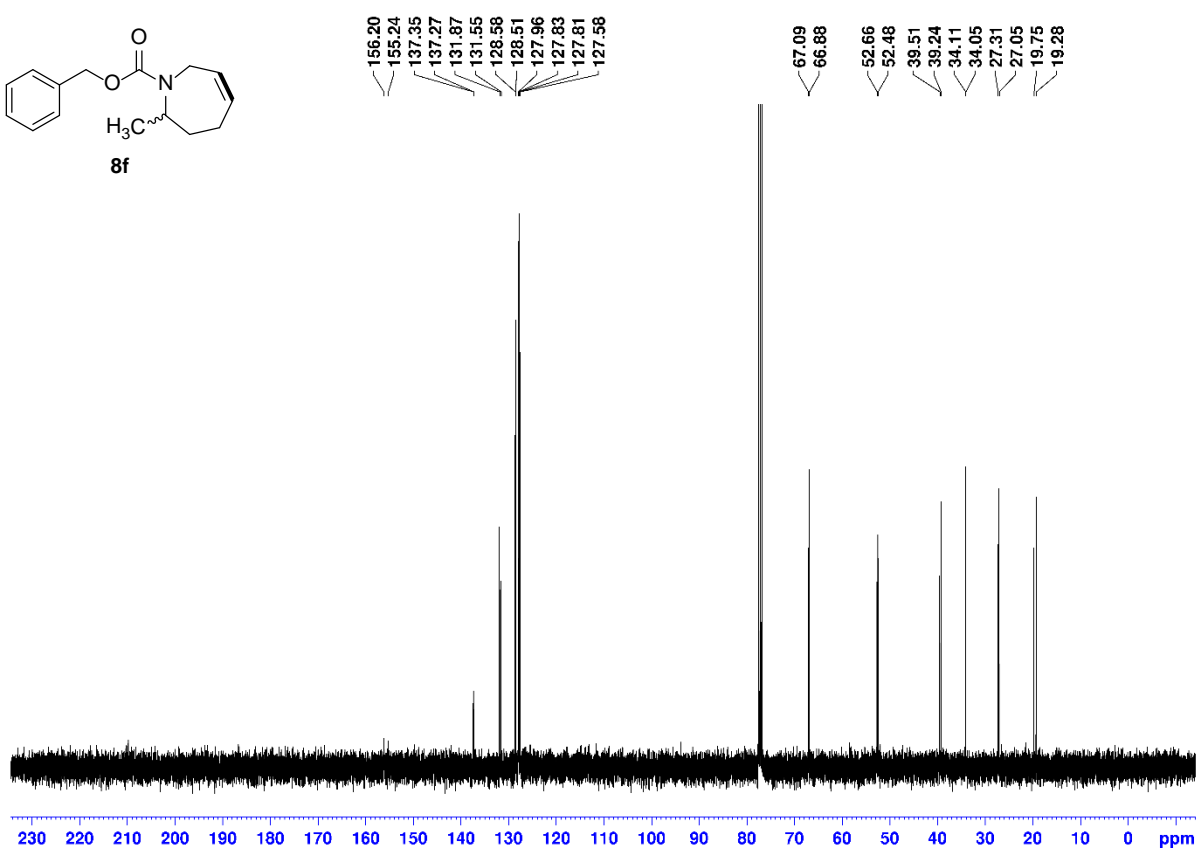

$^1\text{H}$  NMR (400 MHz),  $\text{CDCl}_3$

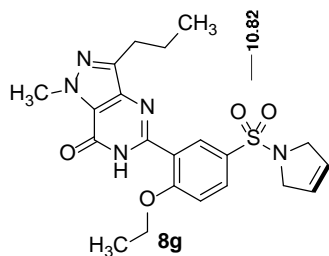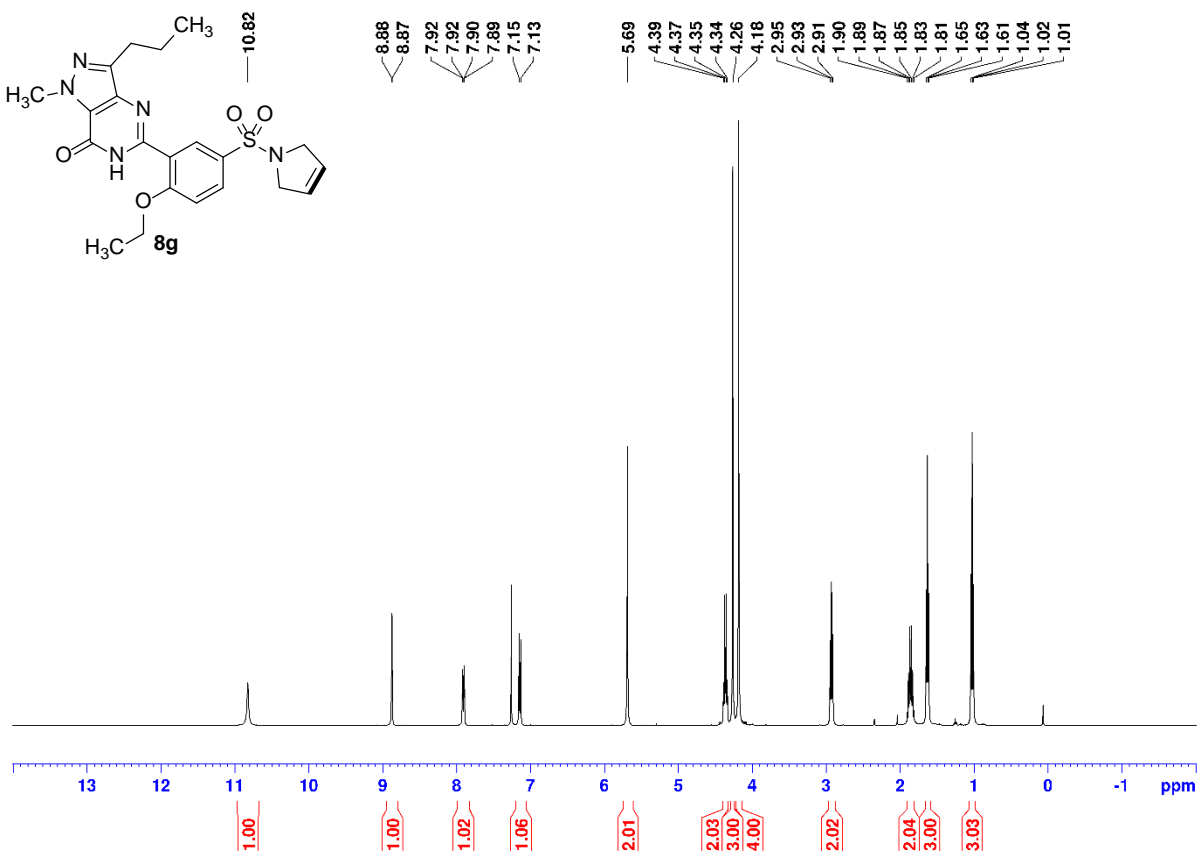

$^{13}\text{C}$  NMR (101 MHz),  $\text{CDCl}_3$

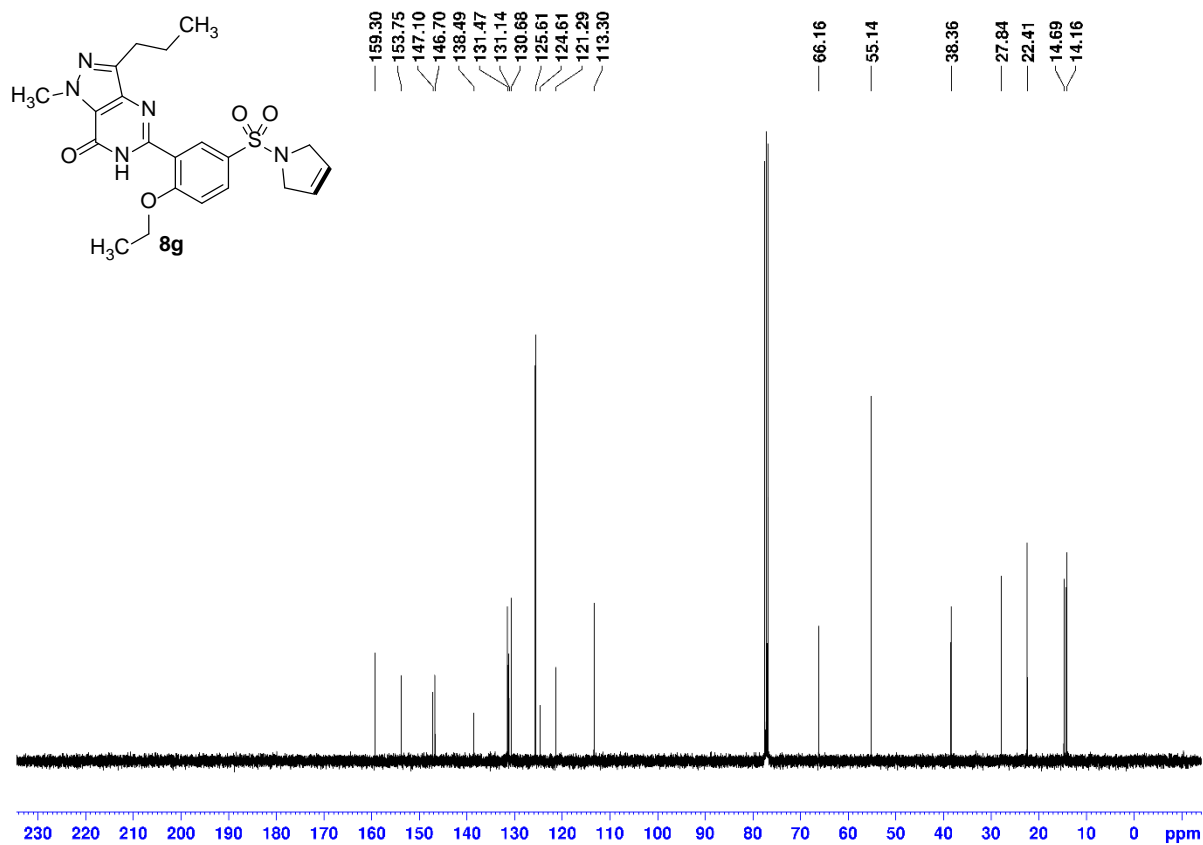

## 6. References

1. Małecki, P.; Gajda, K.; Ablialimov, O.; Malińska, M.; Gajda, R.; Woźniak, K.; Kajetanowicz, A.; Grela, K., *Organometallics* **2017**, *36*, 2153-2166.
2. BouzBouz, S.; Boulard, L.; Cossy, J., *Org. Lett.* **2007**, *9*, 3765-3768.
3. So, C. M.; Kume, S.; Hayashi, T., *J. Am. Chem. Soc.* **2013**, *135*, 10990-10993.
4. César, V.; Zhang, Y.; Kośnik, W.; Zieliński, A.; Rajkiewicz, A. A.; Ruamps, M.; Bastin, S.; Lugan, N.; Lavigne, G.; Grela, K., *Chem. Eur. J.* **2017**, *23*, 1950-1955.
5. Szczepaniak, G.; Urbaniak, K.; Wierzbička, C.; Kosiński, K.; Skowerski, K.; Grela, K., *ChemSusChem* **2015**, *8*, 4139-4148.
6. Rajkiewicz, A. A.; Skowerski, K.; Trzaskowski, B.; Kajetanowicz, A.; Grela, K., *ACS Omega* **2019**, *4*, 1831-1837.
7. Yamashita, D. S.; Marquis, R. W.; Xie, R.; Nidamathy, S. D.; Oh, H.-J.; Jeong, J. U.; Erhard, K. F.; Ward, K. W.; Roethke, T. J.; Smith, B. R.; Cheng, H. Y.; Geng, X.; Lin, F.; Offen, P. H.; Wang, B.; Nevins, N.; Head, M. S.; Haltiwanger, R. C.; Narducci Sarjeant, A. A.; Liable-Sands, L. M.; Zhao, B.; Smith, W. W.; Janson, C. A.; Gao, E.; Tomaszek, T.; McQueney, M.; James, I. E.; Gress, C. J.; Zembryki, D. L.; Lark, M. W.; Veber, D. F., *J. Med. Chem.* **2006**, *49*, 1597-1612.
8. Monsigny, L.; Piątkowski, J.; Trzybiński, D.; Woźniak, K.; Nienałtowski, T.; Kajetanowicz, A.; Grela, K., *Adv. Synth. Catal.* **2021**, *363*, 4590-4604.
9. Szczepaniak, G.; Ruszczyńska, A.; Kosiński, K.; Bulska, E.; Grela, K., *Green Chem.* **2018**, *20*, 1280-1289.
10. Chołuj, A.; Krzesiński, P.; Ruszczyńska, A.; Bulska, E.; Kajetanowicz, A.; Grela, K., *Organometallics* **2019**, *38*, 3397-3405.
